# Supplementary material
Source: Copernicus journal article supplement (doi:10.5194/egusphere-2026-1921)
Supplement: Supplementary file 1 [file egusphere-2026-1921-supplement.pdf]

# Supplementary Information for “GENOA v3: A Flexible Tool for Reduction and Exploration of Explicit Chemical Mechanisms”

Zhizhao Wang<sup>1,2</sup>, William P. L. Carter<sup>1</sup>, Julia Lee-Taylor<sup>2</sup>, John Orlando<sup>2</sup>, Qing Ye<sup>2</sup>, Richard Valorso<sup>3</sup>, Marie Camredon<sup>3</sup>, Bernard Aumont<sup>3</sup>, and Kelley Barsanti<sup>2</sup>

<sup>1</sup>College of Engineering Center for Environmental Research and Technology (CE-CERT), University of California, Riverside, CA 92521, USA

<sup>2</sup>Atmospheric Chemistry Observations & Modeling Lab (ACOM), NSF National Center for Atmospheric Research, Boulder, CO 80301, USA

<sup>3</sup>Univ Paris Est Creteil and Université Paris Cité, CNRS, LISA, F-94010 Créteil, France

**Correspondence:** Zhizhao Wang (zhizhaow@ucr.edu) and Kelley Barsanti (barsanti@ucar.edu)

## Contents

|                                                                         |           |
|-------------------------------------------------------------------------|-----------|
| <b>S1 Evaluation scenarios</b>                                          | <b>2</b>  |
| S1.1 General simulation setup and input profiles . . . . .              | 2         |
| S1.2 Time series of key oxidants and radicals . . . . .                 | 4         |
| <b>S2 Additional TBR results</b>                                        | <b>11</b> |
| S2.1 Sensitivity analyses for TBR strategies . . . . .                  | 11        |
| S2.2 Summary of size reduction and evaluation metrics . . . . .         | 16        |
| S2.3 Additional NMB distributions for evaluation metrics . . . . .      | 28        |
| <b>S3 Additional SBR results</b>                                        | <b>32</b> |
| S3.1 Additional stage settings and U8A3d reduction trajectory . . . . . | 32        |
| S3.1.1 Elementary-like treatment . . . . .                              | 32        |
| S3.1.2 U8A3d reduction trajectory . . . . .                             | 33        |
| S3.2 NMB distribution and time variation preservation . . . . .         | 34        |
| S3.2.1 Scenario-dependent chemical behavior (U8 example) . . . . .      | 36        |
| S3.3 Reaction pathway visualization for SBR mechanisms . . . . .        | 40        |
| S3.4 Reduction mechanism details . . . . .                              | 47        |
| S3.4.1 Species mapping for surrogates from lumping . . . . .            | 47        |
| S3.5 Carbon propagation and conservation . . . . .                      | 52        |

## S1 Evaluation scenarios

### S1.1 General simulation setup and input profiles

In addition to the scenario setups described in Sect. 4.2, solar positions for scenarios with dynamic photolysis are computed assuming a latitude of  $45^\circ$  and a longitude of  $0^\circ$ , with the simulation date set to 1 January 2015 (00:00 local time). Photolysis rates are prescribed using the `solarlight.phot` lookup table distributed with the GECKO-A box model Zenodo release (Aumont et al., 2025).

For all non-diurnal scenarios, initial concentration profiles are summarized in Table S1. For the diurnal scenario, hourly concentration profiles are prescribed, as listed in Table S2.

**Table S1.** Initial gas-phase species concentrations (molecules  $\text{cm}^{-3}$ ) specified for non-diurnal scenarios.

| Species                          | name <sup>a</sup> | urban <sup>b</sup>    | remote                | continental           | poll-cont             | remote-cont           | simplified <sup>c</sup> |
|----------------------------------|-------------------|-----------------------|-----------------------|-----------------------|-----------------------|-----------------------|-------------------------|
| O <sub>3</sub>                   | GO3               | $1 \times 10^{12}$      |
| NO                               | GNO               | $1.42 \times 10^{11}$ | $4.82 \times 10^7$    | $2.59 \times 10^9$    | $1.05 \times 10^{10}$ | $1.17 \times 10^8$    | $1.42 \times 10^{11}$   |
| NO <sub>2</sub>                  | GNO2              | $3.58 \times 10^{11}$ | $2.02 \times 10^8$    | $9.91 \times 10^9$    | $3.95 \times 10^{10}$ | $5.08 \times 10^8$    | $3.58 \times 10^{11}$   |
| HCHO                             | GCH2O             | $9.32 \times 10^2$    | $1.05 \times 10^3$    | $1.14 \times 10^3$    | $8.76 \times 10^2$    | $1.14 \times 10^3$    | –                       |
| CO                               | GCO               | $1.11 \times 10^5$    | $1.33 \times 10^5$    | $1.47 \times 10^5$    | $1.01 \times 10^5$    | $1.48 \times 10^5$    | –                       |
| CO <sub>2</sub>                  | GCO2              | $1.51 \times 10^5$    | $1.26 \times 10^5$    | $1.10 \times 10^5$    | $1.63 \times 10^5$    | $1.09 \times 10^5$    | –                       |
| H <sub>2</sub>                   | GH2               | $8.61 \times 10^4$    | $9.21 \times 10^4$    | $9.59 \times 10^4$    | $8.35 \times 10^4$    | $9.61 \times 10^4$    | –                       |
| H <sub>2</sub> O                 | GH2O              | $5.33 \times 10^{17}$ | –                       |
| H <sub>2</sub> O <sub>2</sub>    | GH2O2             | $2.22 \times 10^9$    | $8.29 \times 10^{11}$ | $1.81 \times 10^{11}$ | $1.56 \times 10^{11}$ | $6.65 \times 10^{11}$ | –                       |
| HONO                             | GHNO2             | $3.54 \times 10^9$    | $8.84 \times 10^5$    | $3.67 \times 10^7$    | $3.03 \times 10^8$    | $1.66 \times 10^6$    | –                       |
| HNO <sub>3</sub>                 | GHNO3             | $9.04 \times 10^{11}$ | $3.78 \times 10^8$    | $1.43 \times 10^{10}$ | $1.15 \times 10^{11}$ | $7.38 \times 10^8$    | –                       |
| HNO <sub>4</sub>                 | GHNO4             | $3.41 \times 10^8$    | $3.45 \times 10^6$    | $7.50 \times 10^7$    | $3.29 \times 10^8$    | $7.36 \times 10^6$    | –                       |
| OH                               | GHO               | $5.11 \times 10^6$    | $3.73 \times 10^6$    | $2.87 \times 10^6$    | $5.92 \times 10^6$    | $2.88 \times 10^6$    | –                       |
| HO <sub>2</sub>                  | GHO2              | $8.41 \times 10^7$    | $1.51 \times 10^9$    | $6.68 \times 10^8$    | $7.35 \times 10^8$    | $1.28 \times 10^9$    | –                       |
| CH <sub>3</sub> ONO <sub>2</sub> | GN01001           | $1.04 \times 10^5$    | $1.07 \times 10^5$    | $1.08 \times 10^5$    | $1.02 \times 10^5$    | $1.08 \times 10^5$    | –                       |
| N <sub>2</sub> O <sub>5</sub>    | GN2O5             | $3.49 \times 10^7$    | $2.10 \times 10^2$    | $3.78 \times 10^5$    | $3.58 \times 10^6$    | $1.30 \times 10^3$    | –                       |
| NO <sub>3</sub>                  | GNO3              | $3.12 \times 10^6$    | $3.33 \times 10^4$    | $1.22 \times 10^6$    | $2.90 \times 10^6$    | $8.22 \times 10^4$    | –                       |
| O <sub>2</sub>                   | GO2               | $4.87 \times 10^{18}$ | –                       |
| O( <sup>3</sup> P)               | GO3P              | $4.68 \times 10^4$    | $6.18 \times 10^3$    | $7.29 \times 10^3$    | $1.06 \times 10^4$    | $6.22 \times 10^3$    | –                       |

<sup>a</sup> Species name as used in GECKO-A mechanisms. For O<sub>3</sub> with fixed profiles, the initial concentration equals the fixed value. For NO<sub>x</sub> (NO + NO<sub>2</sub>), the total concentration is fixed, and the NO/NO<sub>2</sub> ratio is set by the initial concentrations.

<sup>b</sup> Same values are applied to the urban-nophot and urban-highphot scenarios.

<sup>c</sup> Same values are applied to the simpl-nophot and simpl-highphot scenarios.

**Table S2.** Hourly profiles (0–23 hour) of species concentrations (molecules  $\text{cm}^{-3}$ ) and environmental parameters specified for the diurnal scenario. The diurnal constraints are derived from the 2013 Southern Oxidant and Aerosol Study (SOAS) field campaign compiled into a 24 h diurnal cycle at 1 h resolution and distributed with the F0AM box model framework. The corresponding data are provided in the F0AM example file `ExampleSetup_DielCycle.m`, archived in the F0AM Zenodo release (Wolfe and Haskins, 2023). Units are converted as needed to ensure consistency with the GECKO-A box model setup. Primary VOC (PVOC) concentrations adopt the corresponding  $\alpha$ -pinene diurnal profile.

| Hour | OH                 | NO                 | NO <sub>2</sub>       | O <sub>3</sub>        | PVOC                  | PRES <sup>a</sup>     | RH (%) | SZA (°) | T (K)  |
|------|--------------------|--------------------|-----------------------|-----------------------|-----------------------|-----------------------|--------|---------|--------|
| 0    | $1.71 \times 10^5$ | $1.13 \times 10^8$ | $1.63 \times 10^{10}$ | $5.21 \times 10^{11}$ | $1.16 \times 10^{10}$ | $2.44 \times 10^{19}$ | 85.2   | 90.0    | 296.91 |
| 1    | $1.78 \times 10^5$ | $1.67 \times 10^8$ | $1.92 \times 10^{10}$ | $4.60 \times 10^{11}$ | $1.29 \times 10^{10}$ | $2.45 \times 10^{19}$ | 88.7   | 90.0    | 296.18 |
| 2    | $1.40 \times 10^5$ | $1.16 \times 10^8$ | $2.13 \times 10^{10}$ | $4.29 \times 10^{11}$ | $1.30 \times 10^{10}$ | $2.45 \times 10^{19}$ | 90.8   | 90.0    | 295.61 |
| 3    | $9.21 \times 10^3$ | $6.95 \times 10^7$ | $2.08 \times 10^{10}$ | $4.22 \times 10^{11}$ | $1.53 \times 10^{10}$ | $2.46 \times 10^{19}$ | 91.9   | 90.0    | 295.20 |
| 4    | $8.42 \times 10^4$ | $2.52 \times 10^8$ | $3.10 \times 10^{10}$ | $4.04 \times 10^{11}$ | $1.49 \times 10^{10}$ | $2.46 \times 10^{19}$ | 92.1   | 90.0    | 294.91 |
| 5    | $1.70 \times 10^5$ | $4.63 \times 10^8$ | $2.50 \times 10^{10}$ | $3.27 \times 10^{11}$ | $1.47 \times 10^{10}$ | $2.46 \times 10^{19}$ | 94.8   | 90.0    | 294.32 |
| 6    | $1.10 \times 10^4$ | $1.46 \times 10^9$ | $2.57 \times 10^{10}$ | $3.05 \times 10^{11}$ | $1.37 \times 10^{10}$ | $2.47 \times 10^{19}$ | 95.7   | 87.1    | 294.08 |
| 7    | $2.36 \times 10^5$ | $6.89 \times 10^9$ | $2.35 \times 10^{10}$ | $2.79 \times 10^{11}$ | $1.60 \times 10^{10}$ | $2.47 \times 10^{19}$ | 94.8   | 76.2    | 294.50 |
| 8    | $4.34 \times 10^5$ | $8.23 \times 10^9$ | $2.24 \times 10^{10}$ | $3.82 \times 10^{11}$ | $9.37 \times 10^9$    | $2.45 \times 10^{19}$ | 89.8   | 63.6    | 296.18 |
| 9    | $7.80 \times 10^5$ | $5.63 \times 10^9$ | $1.76 \times 10^{10}$ | $5.36 \times 10^{11}$ | $7.76 \times 10^9$    | $2.44 \times 10^{19}$ | 83.2   | 51.2    | 297.88 |
| 10   | $1.08 \times 10^6$ | $3.46 \times 10^9$ | $1.38 \times 10^{10}$ | $6.39 \times 10^{11}$ | $5.38 \times 10^9$    | $2.43 \times 10^{19}$ | 79.6   | 39.1    | 298.84 |
| 11   | $1.17 \times 10^6$ | $1.89 \times 10^9$ | $9.57 \times 10^9$    | $7.35 \times 10^{11}$ | $4.68 \times 10^9$    | $2.42 \times 10^{19}$ | 74.2   | 26.2    | 299.76 |
| 12   | $1.53 \times 10^6$ | $1.22 \times 10^9$ | $6.91 \times 10^9$    | $8.34 \times 10^{11}$ | $3.72 \times 10^9$    | $2.42 \times 10^{19}$ | 69.4   | 14.8    | 300.68 |
| 13   | $1.64 \times 10^6$ | $1.00 \times 10^9$ | $5.85 \times 10^9$    | $8.65 \times 10^{11}$ | $3.73 \times 10^9$    | $2.41 \times 10^{19}$ | 65.5   | 9.8     | 301.30 |
| 14   | $1.49 \times 10^6$ | $9.64 \times 10^8$ | $4.92 \times 10^9$    | $9.03 \times 10^{11}$ | $3.53 \times 10^9$    | $2.40 \times 10^{19}$ | 61.2   | 17.9    | 302.05 |
| 15   | $1.47 \times 10^6$ | $8.93 \times 10^8$ | $5.34 \times 10^9$    | $9.56 \times 10^{11}$ | $3.17 \times 10^9$    | $2.40 \times 10^{19}$ | 58.7   | 29.8    | 302.64 |
| 16   | $1.24 \times 10^6$ | $9.01 \times 10^8$ | $5.57 \times 10^9$    | $9.58 \times 10^{11}$ | $3.60 \times 10^9$    | $2.40 \times 10^{19}$ | 59.1   | 41.8    | 302.61 |
| 17   | $9.92 \times 10^5$ | $1.02 \times 10^9$ | $7.14 \times 10^9$    | $9.72 \times 10^{11}$ | $3.72 \times 10^9$    | $2.39 \times 10^{19}$ | 57.6   | 54.9    | 302.76 |
| 18   | $5.41 \times 10^5$ | $6.82 \times 10^8$ | $8.16 \times 10^9$    | $9.93 \times 10^{11}$ | $3.79 \times 10^9$    | $2.40 \times 10^{19}$ | 59.5   | 67.2    | 302.41 |
| 19   | $3.11 \times 10^5$ | $3.33 \times 10^8$ | $8.51 \times 10^9$    | $9.18 \times 10^{11}$ | $5.18 \times 10^9$    | $2.40 \times 10^{19}$ | 62.2   | 78.7    | 301.73 |
| 20   | $2.46 \times 10^5$ | $5.72 \times 10^7$ | $1.17 \times 10^{10}$ | $8.68 \times 10^{11}$ | $5.94 \times 10^9$    | $2.41 \times 10^{19}$ | 66.6   | 89.6    | 300.75 |
| 21   | $2.45 \times 10^5$ | 0                  | $1.40 \times 10^{10}$ | $7.60 \times 10^{11}$ | $6.47 \times 10^9$    | $2.42 \times 10^{19}$ | 72.0   | 90.0    | 299.65 |
| 22   | $1.52 \times 10^5$ | $1.31 \times 10^8$ | $1.32 \times 10^{10}$ | $6.25 \times 10^{11}$ | $1.79 \times 10^{10}$ | $2.43 \times 10^{19}$ | 78.6   | 90.0    | 298.52 |
| 23   | $2.17 \times 10^5$ | $8.63 \times 10^7$ | $1.14 \times 10^{10}$ | $5.68 \times 10^{11}$ | $8.06 \times 10^9$    | $2.43 \times 10^{19}$ | 80.2   | 90.0    | 298.02 |

<sup>a</sup> Pressure (PRES) is expressed as air number density (molecules  $\text{cm}^{-3}$ ). Hourly input settings for PRES, RH, SZA, and T are currently available only in the GENOA-coupled version of the GECKO-A box model.

## S1.2 Time series of key oxidants and radicals

Figures S1–S6 present the time series of key oxidant and radical concentrations ( $O_3$ ,  $NO_x$ ,  $HO_x$ ,  $RO_2$ ,  $NO_3$ ) simulated using the reference mechanisms for each VOC class (Cs, Us, MTs) under 11 evaluation scenarios. For readability, results are split into two scenario groups (“g1” with six scenarios: urban, remote, continental, poll-cont, remote-cont, diurnal; “g2” with five scenarios: simplified, simpl-nophot, simpl-highphot, urban-nophot, urban-highphot). In each panel, the blue line indicates the mean time series, and the gray shaded area denotes the simulated minimum-to-maximum range across all VOC in the corresponding group.

Mean (min-max range) across 12 Cs Ref mechanisms

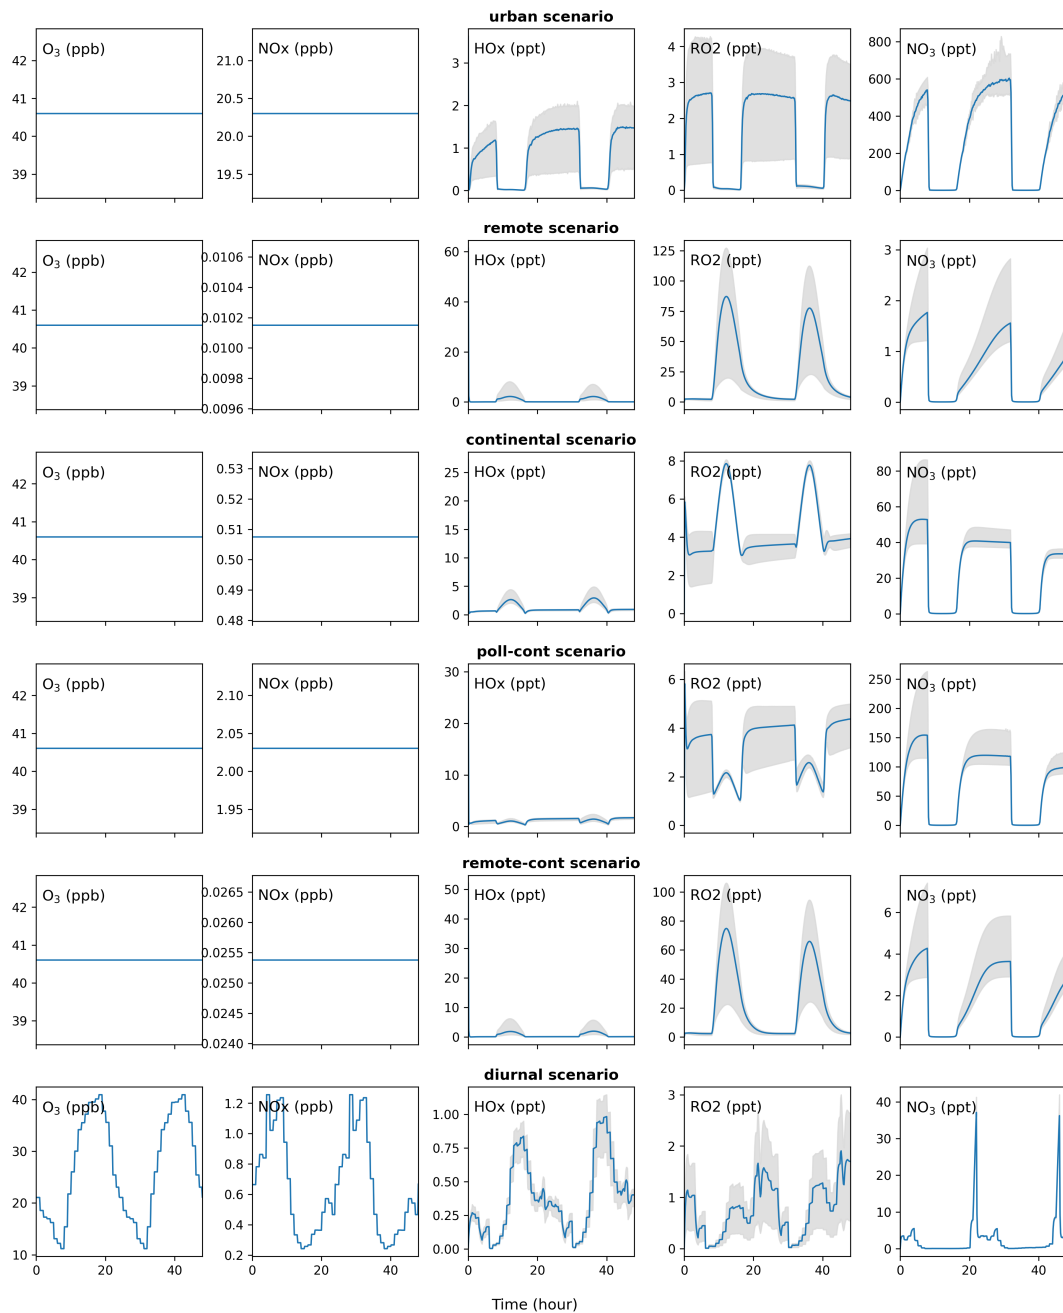

**Figure S1.** Time series of key oxidant and radical concentrations simulated using the reference Cs mechanisms (C5–C16) under scenario group g1.

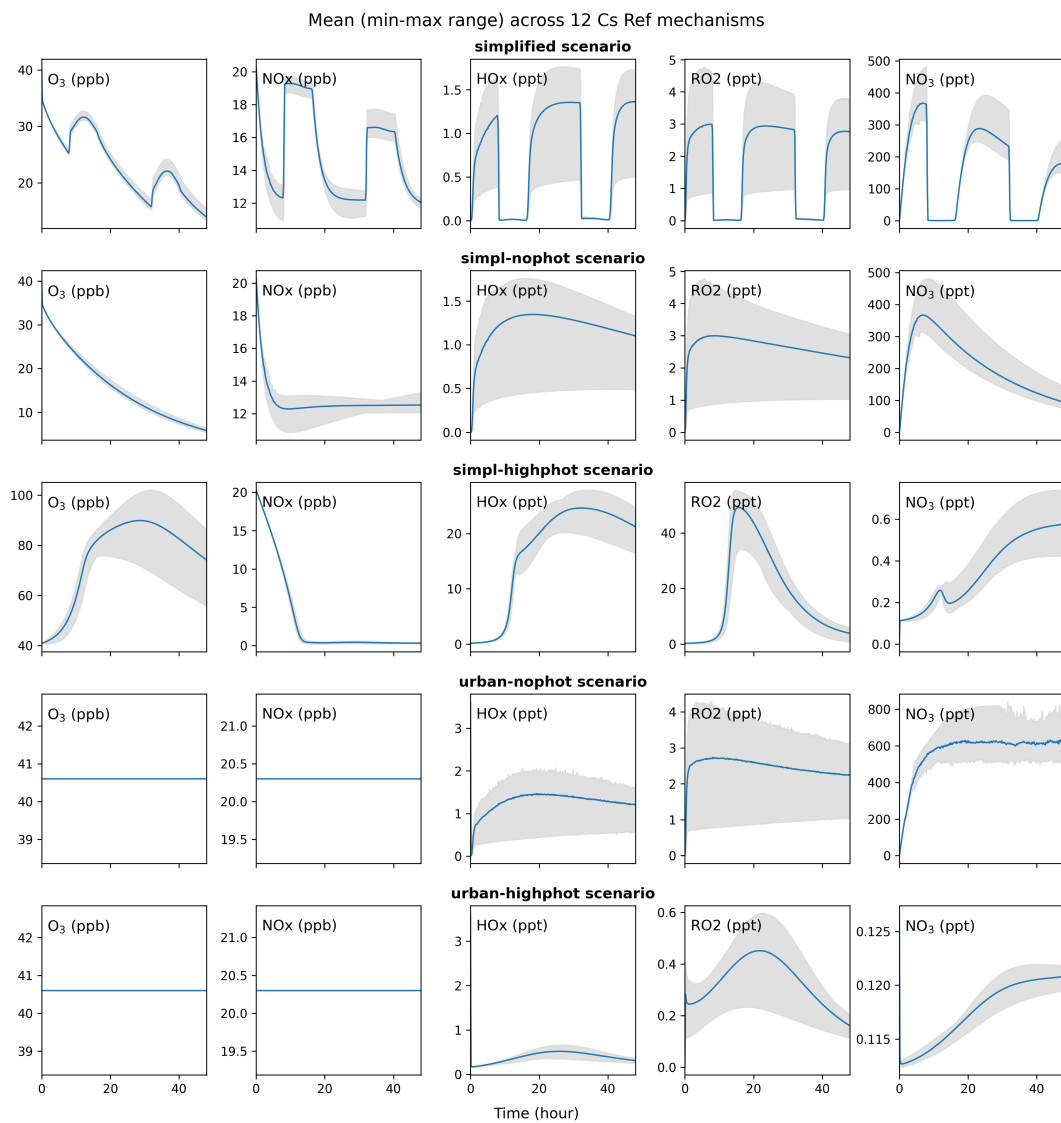

**Figure S2.** Time series of key oxidant and radical concentrations simulated using the reference Cs mechanisms (C5–C16) under scenario group g2.

Mean (min-max range) across 12 Us Ref mechanisms

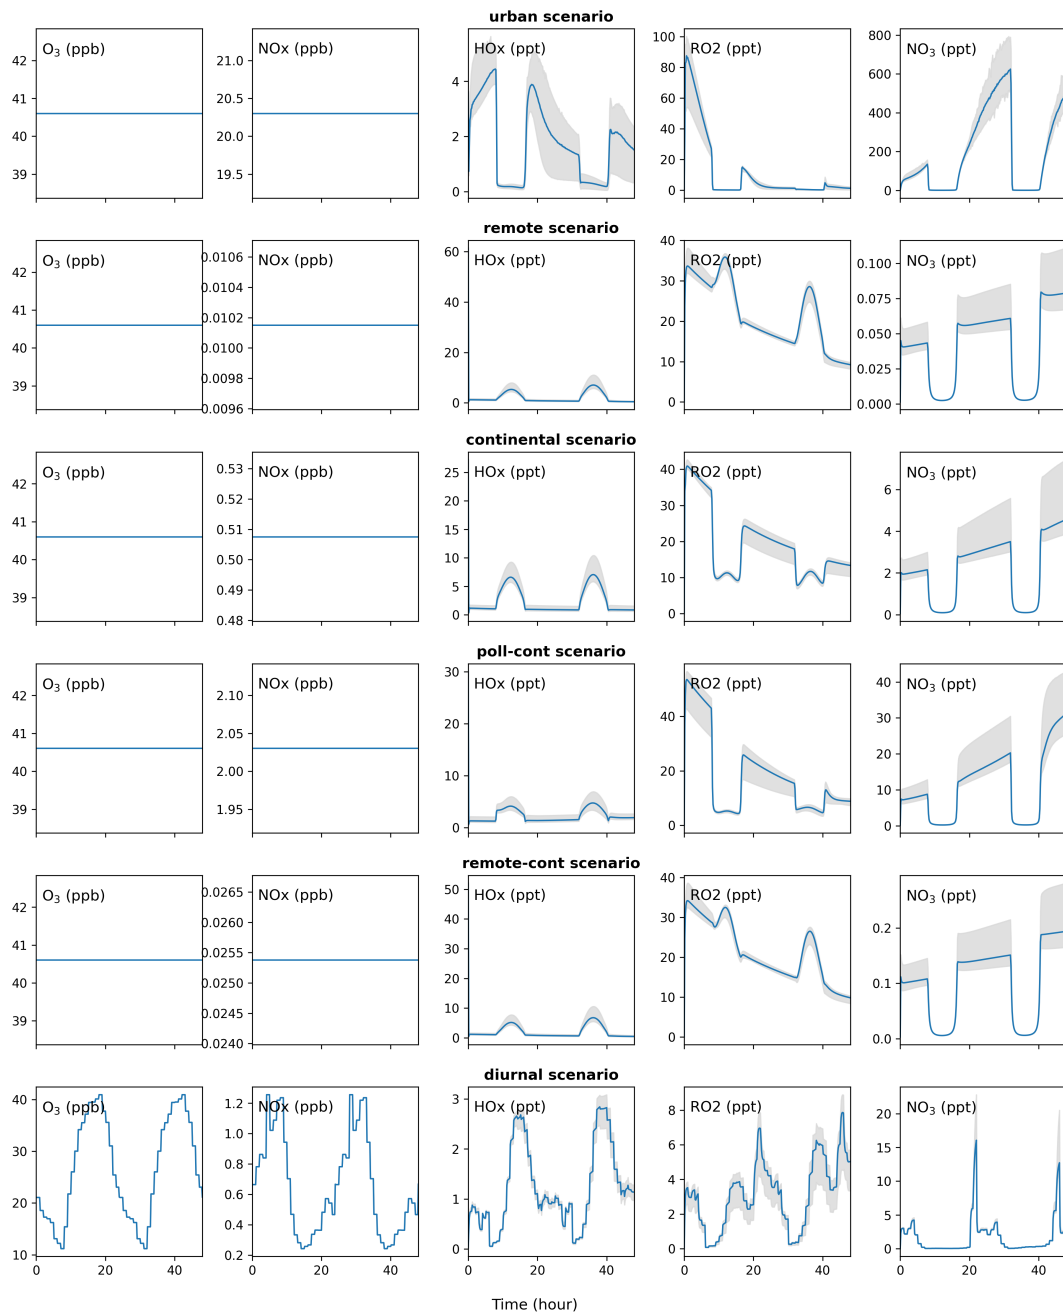

**Figure S3.** Time series of key oxidant and radical concentrations simulated using the reference Us mechanisms (U5–U16) under scenario group g1.

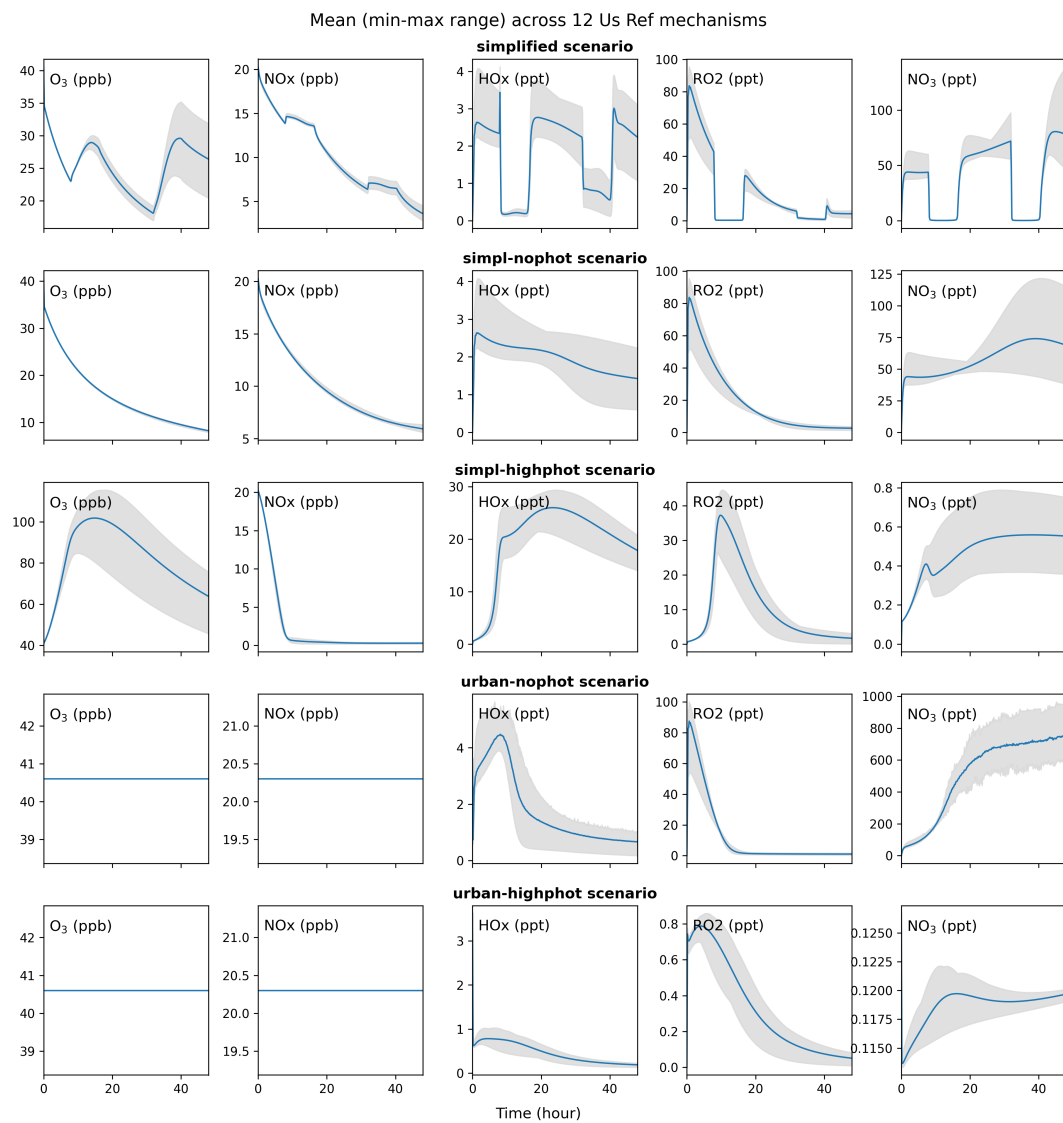

**Figure S4.** Time series of key oxidant and radical concentrations simulated using the reference Us mechanisms (U5–U16) under scenario group g2.

Mean (min-max range) across 5 MTs Ref mechanisms

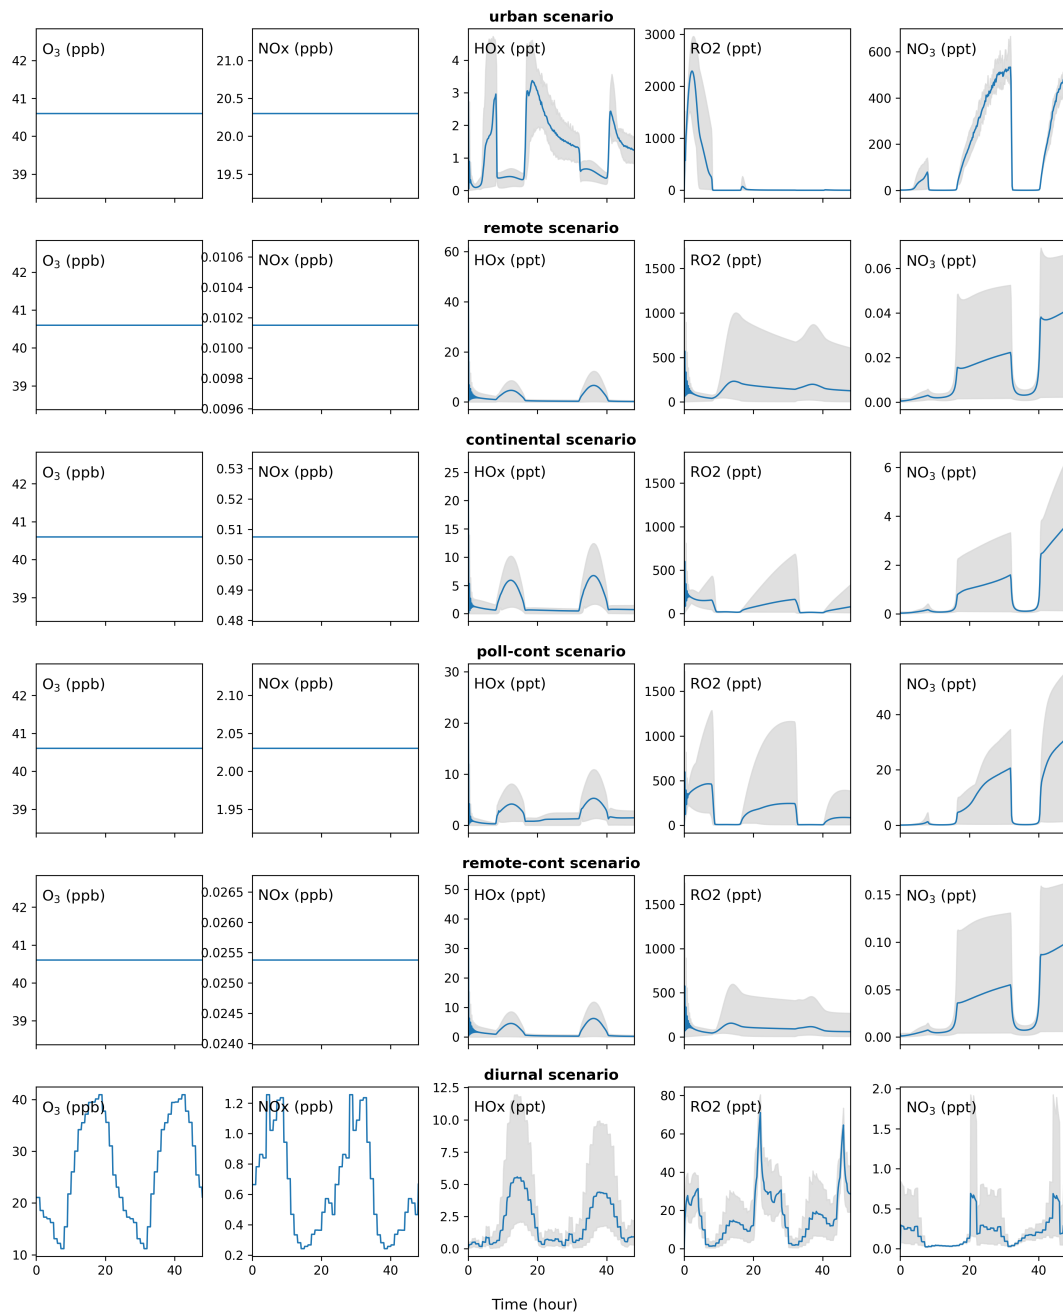

**Figure S5.** Time series of key oxidant and radical concentrations simulated using the reference MTs mechanisms ( $\alpha$ -pinene,  $\beta$ -pinene, limonene, camphene, and carene) under scenario group g1.

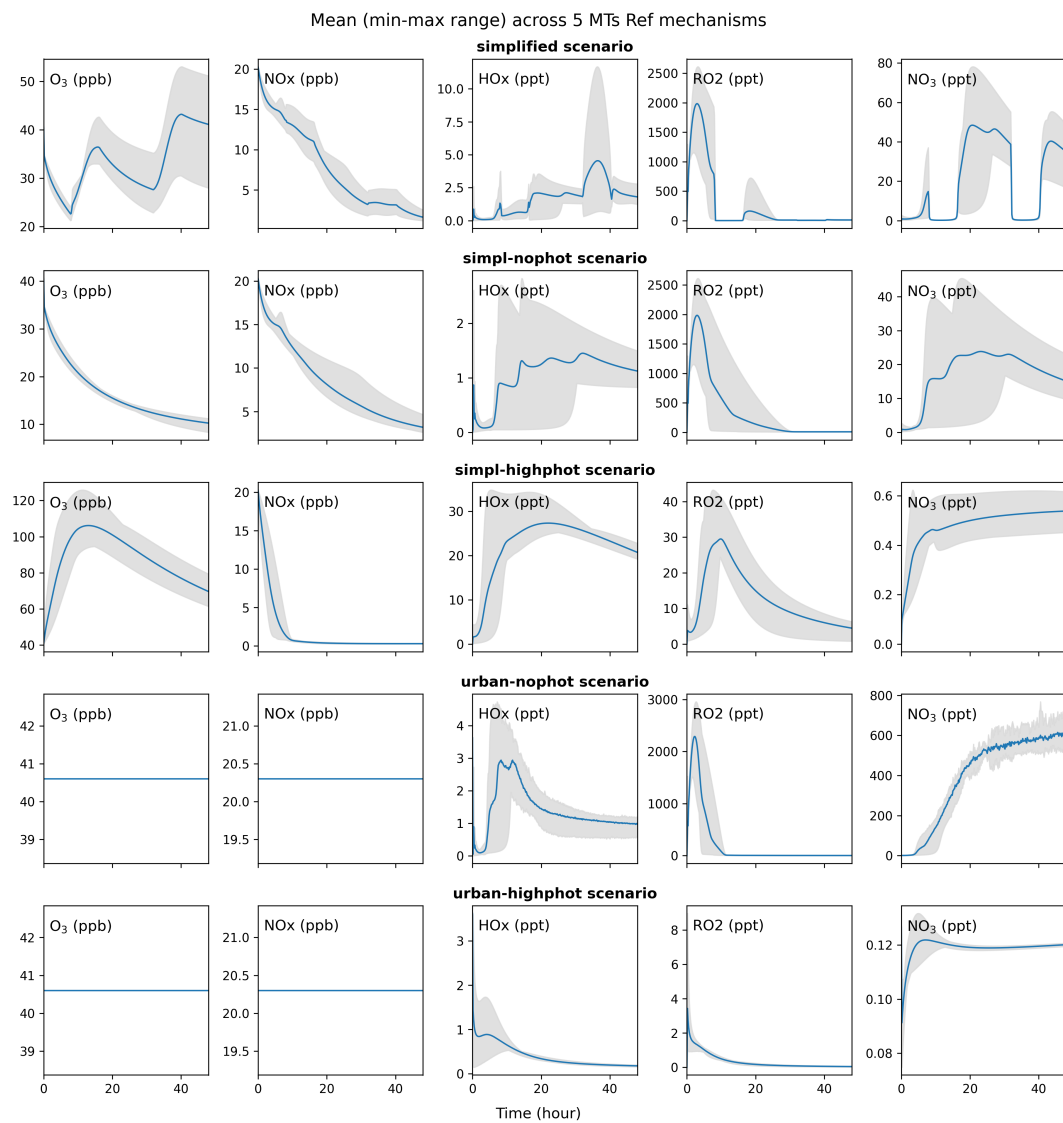

**Figure S6.** Time series of key oxidant and radical concentrations simulated using the reference MTs mechanisms ( $\alpha$ -pinene,  $\beta$ -pinene, limonene, camphene, and carene) under scenario group g2.

## S2 Additional TBR results

### S2.1 Sensitivity analyses for TBR strategies

As described in Sect. 4.3, sensitivity analyses are performed for individual TBR strategies to identify suitable threshold ranges. Mechanism size reduction and reduction accuracy, quantified using reduction errors averaged across all simulation scenarios, are presented in Figs. S7–S15. In addition to tSOA and OH shown in the main paper, two additional evaluation targets are included here: IOH, the loss tracer for OH, and NO<sub>3</sub>, representing nighttime chemistry. In all figures, marker shapes denote threshold values, and lines connect results from the same mechanism. For clarity, only one representative mechanism from each VOC class (U8, C12, and LIM) is shown.

The NVOC reclassification strategy is excluded from this sensitivity analysis because it does not affect GECKO-A simulations, in which non-volatile species are not treated explicitly or distinguished from other SVOCs. This strategy would become relevant only if NVOC species were handled differently in the chemical solver.

For the fast-degrading species jumping strategy, threshold scans over a wide lifetime range ( $\tau^{\text{fast}} = 10^{-4}$ – $10^5$  s) result in nearly identical size reduction and only minor variations in reduction error (Fig. S13). Under the evaluated scenarios, most species that allow jumping already have lifetimes shorter than  $10^{-4}$  s. As a result, enlarging the threshold range adds very few additional species classified as fast-degrading, leading to nearly identical reduction outcomes and overlapping markers across thresholds. The upper bound of  $10^5$  s is intentionally chosen to extend well beyond what may normally be considered fast-degrading, in order to examine how size reduction and reduction error change across a wide range of thresholds. When selecting the threshold, 1 s is chosen as a representative value within the tested range (Table 4). Larger values are not adopted as they would include species whose lifetimes depend strongly on environmental conditions.

For the yield-to-depth ratio removal strategy, threshold values from  $10^{-4}$  to 10 % are explored (Fig. S14). The smallest threshold ( $10^{-4}$ ) leads to no reduction and is not shown. The largest threshold (10 %) results in excessive removal (size reduction  $\sim 93\%$ ) and large errors (40–60 %), and is therefore omitted for clarity. This is consistent with the GECKO-A generation procedure, where relative yield cutoffs are already applied (Sects. 3.2.1 and 4.1). As a result, many low-yield branches have already been removed.

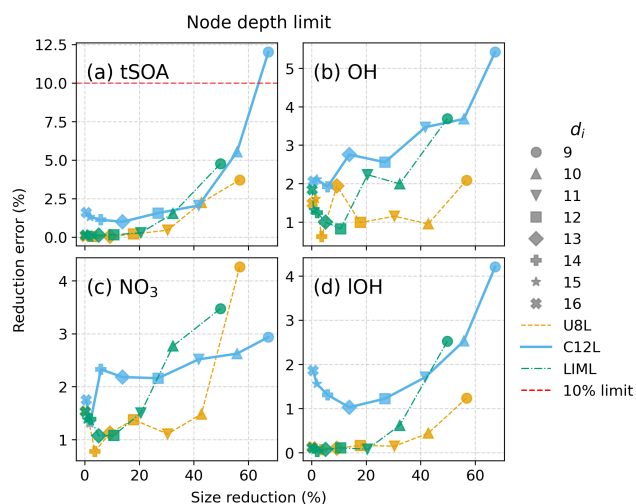

**Figure S7.** Sensitivity of mechanism size reduction and reduction error to threshold variation for the node depth limit ( $d_i$ ), evaluated using tSOA, OH,  $\text{NO}_3$ , and IOH across the U8, C12, and LIM mechanisms.

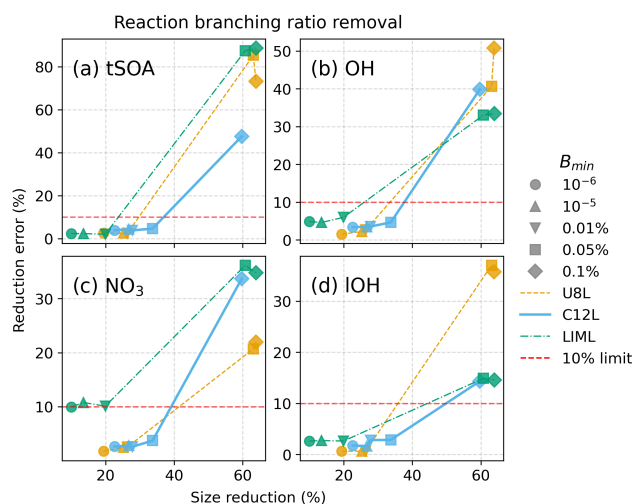

**Figure S8.** Sensitivity of mechanism size reduction and reduction error to threshold variation for the reaction branching ratio removal ( $B_{\min}$ ), evaluated using tSOA, OH,  $\text{NO}_3$ , and IOH across the U8, C12, and LIM mechanisms.

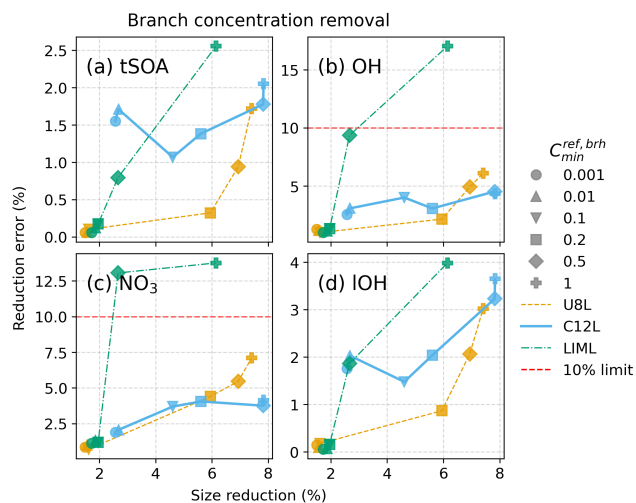

**Figure S9.** Sensitivity of mechanism size reduction and reduction error to threshold variation for the branch concentration removal ( $C_{\min}^{\text{ref,brh}}$  in ppt), evaluated using tSOA, OH,  $\text{NO}_3$ , and IOH across the U8, C12, and LIM mechanisms.

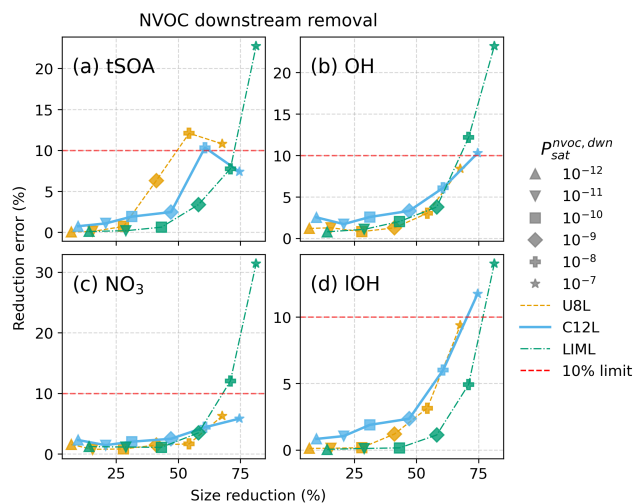

**Figure S10.** Sensitivity of mechanism size reduction and reduction error to threshold variation for the NVOC downstream removal ( $P_{\text{sat}}^{\text{nvoc,dwn}}$  in atm), evaluated using tSOA, OH,  $\text{NO}_3$ , and IOH across the U8, C12, and LIM mechanisms.

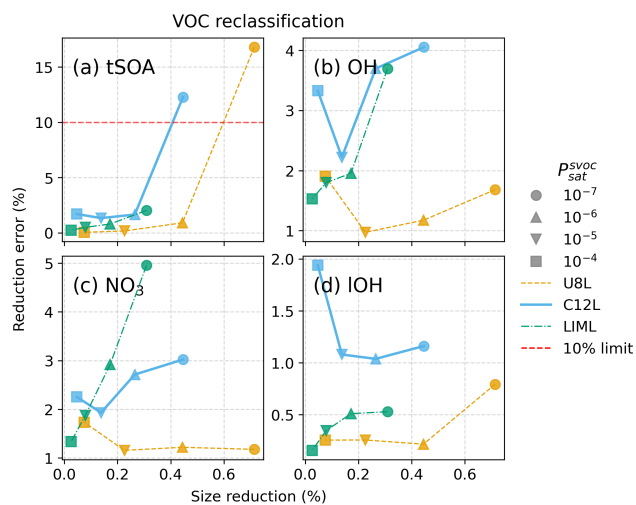

**Figure S11.** Sensitivity of mechanism size reduction and reduction error to threshold variation for the VOC reclassification ( $P_{\text{sat}}^{\text{svoc}}$  in atm), evaluated using tSOA, OH,  $\text{NO}_3$ , and IOH across the U8, C12, and LIM mechanisms.

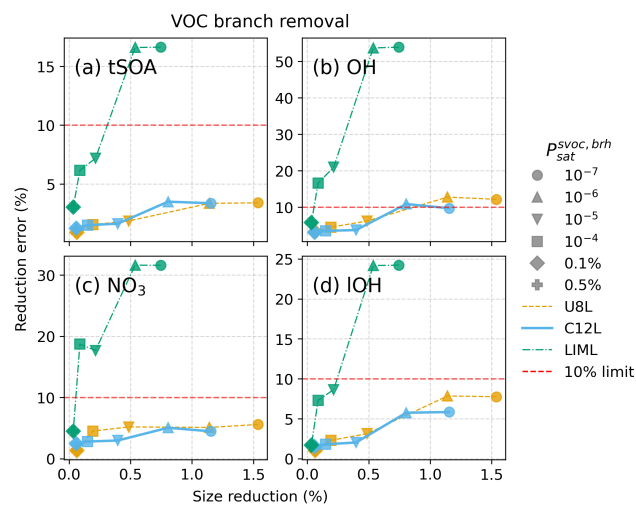

**Figure S12.** Sensitivity of mechanism size reduction and reduction error to threshold variation for the VOC branch removal ( $P_{\text{sat}}^{\text{svoc,brh}}$  in atm), evaluated using tSOA, OH,  $\text{NO}_3$ , and IOH across the U8, C12, and LIM mechanisms.

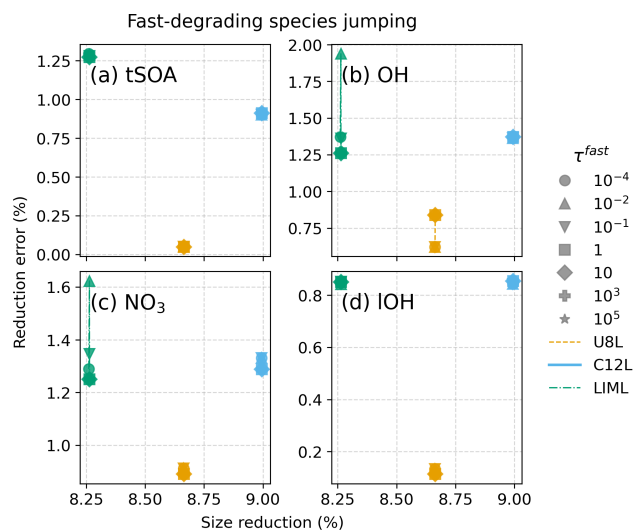

**Figure S13.** Sensitivity of mechanism size reduction and reduction error to threshold variation for the fast-degrading species jumping ( $\tau^{\text{fast}}$  in s), evaluated using tSOA, OH,  $\text{NO}_3$ , and IOH across the U8, C12, and LIM mechanisms.

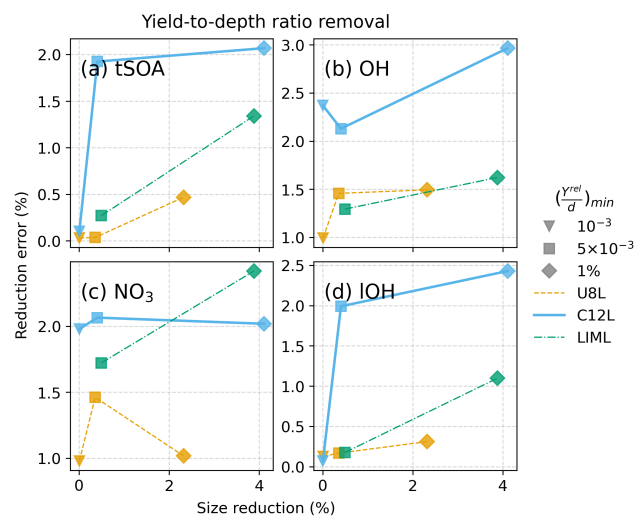

**Figure S14.** Sensitivity of mechanism size reduction and reduction error to threshold variation for the yield-to-depth ratio removal ( $(\frac{Y^{\text{rel}}}{d})_{\text{min}}$ ), evaluated using tSOA, OH,  $\text{NO}_3$ , and IOH across the U8, C12, and LIM mechanisms. For LIM, the threshold ( $\frac{Y^{\text{rel}}}{d})_{\text{min}}$  leads to no reduction.

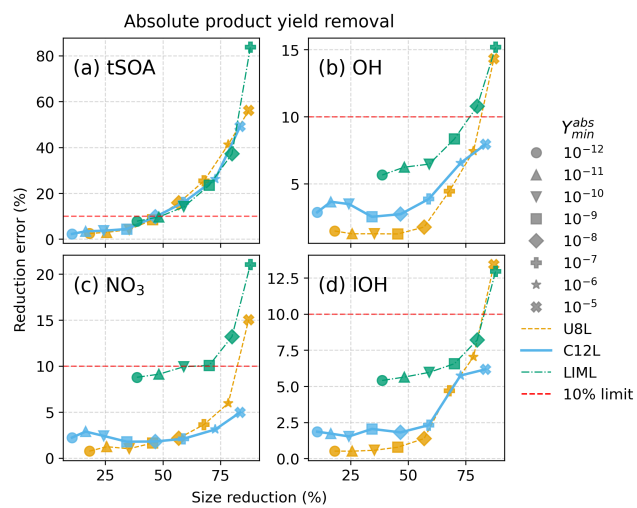

**Figure S15.** Sensitivity of mechanism size reduction and reduction error to threshold variation for the absolute product yield removal, evaluated using tSOA, OH,  $\text{NO}_3$ , and IOH across the U8, C12, and LIM mechanisms.

Figure S16 further examines tracer–species response consistency using TBR sensitivity tests. Correlations of reduction errors across reduced mechanisms are used as a preliminary indicator of tracer representativeness. Strong correlations are found for OH and HO<sub>2</sub>, while correlations for NO<sub>x</sub>, NO<sub>3</sub>, and O<sub>3</sub> are weaker and more variable across VOC classes.

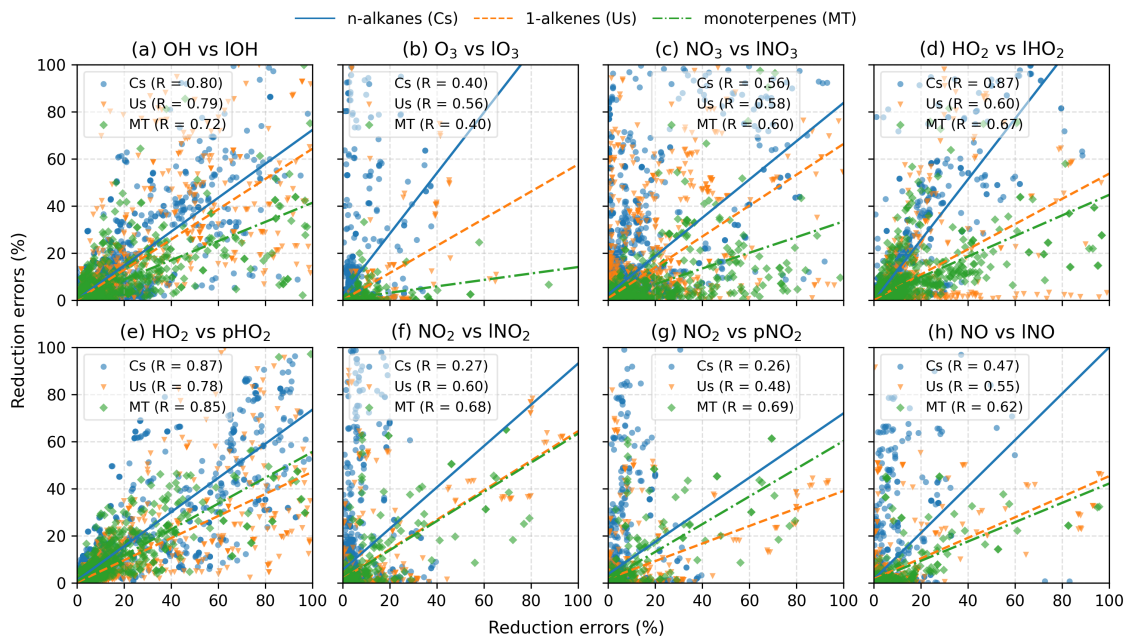

**Figure S16.** Correlation between reduction errors of tracer species and their corresponding explicit species (Sect. 4.4.1) across all reduced mechanisms and scenarios included in the TBR sensitivity tests (Sect. 4.3). Results are shown by VOC class, with correlation coefficients (R) indicated in each panel. Results for the pNO tracer are omitted due to concentrations that are too low ( $\approx 0$ ) for reliable error estimation.

## S2.2 Summary of size reduction and evaluation metrics

Detailed results of the TBR performance evaluation for the T6 and T10 strategy sets are presented. The achieved size reductions, together with the original mechanism sizes prior to TBR, are summarized in Table S3.

Tables S4–S5 report simulated values, reduction errors, and NMB for selected SOA and gas-phase metrics. These results focus on mean values across all PVOCs within each VOC class for individual scenarios (Table S4), as well as mean values across all scenarios for individual PVOCs (Table S5). For metrics that vary only in a subset of scenarios, deviations are computed using that subset. For example, mixing ratios of  $O_3$  and  $NO_x$  are evaluated using three scenarios (simplified, simpl-nophot, and simpl-highphot), whereas PVOC loss ( $\Delta PVOC$ ) is evaluated using ten scenarios, excluding the diurnal scenario in which the PVOC profile is prescribed hourly.

**Table S3.** Mechanism sizes before and after TBR. “ $N^m$ ”, “ $N^{sp}$ ”, and “ $N^{cd}$ ” are the numbers of reactions, species, and condensable species, and “ $\Delta$ ” (%) denotes the reduction relative to the corresponding references.

| PVOC                         | Reference mechanism |          |          | TBR mechanism with T6 |                  |                  | TBR mechanism with T10 |                  |                  |
|------------------------------|---------------------|----------|----------|-----------------------|------------------|------------------|------------------------|------------------|------------------|
|                              | $N^m$               | $N^{sp}$ | $N^{cd}$ | $N^m(\Delta)$         | $N^{sp}(\Delta)$ | $N^{cd}(\Delta)$ | $N^m(\Delta)$          | $N^{sp}(\Delta)$ | $N^{cd}(\Delta)$ |
| n-alkane mechanisms (Cs)     |                     |          |          |                       |                  |                  |                        |                  |                  |
| C5                           | 18 128              | 2 939    | 1 097    | 13 747 (24)           | 1 753 (40)       | 675 (38)         | 774 (96)               | 143 (95)         | 35 (97)          |
| C6                           | 34 841              | 5 543    | 1 797    | 26 012 (25)           | 3 135 (43)       | 1 124 (37)       | 8 931 (74)             | 1 578 (72)       | 461 (74)         |
| C7                           | 52 184              | 8 421    | 2 541    | 37 463 (28)           | 4 460 (47)       | 1 576 (38)       | 16 455 (68)            | 2 792 (67)       | 830 (67)         |
| C8                           | 65 766              | 10 617   | 3 088    | 45 362 (31)           | 5 308 (50)       | 1 819 (41)       | 20 551 (69)            | 3 348 (68)       | 976 (68)         |
| C9                           | 93 568              | 15 045   | 4 002    | 62 961 (33)           | 7 270 (52)       | 2 351 (41)       | 28 410 (70)            | 4 724 (69)       | 1 412 (65)       |
| C10                          | 127 464             | 20 336   | 5 038    | 79 111 (38)           | 9 172 (55)       | 2 902 (42)       | 34 740 (73)            | 5 975 (71)       | 1 783 (65)       |
| C11                          | 174 168             | 27 628   | 6 414    | 104 350 (40)          | 11 897 (57)      | 3 659 (43)       | 44 460 (74)            | 7 723 (72)       | 2 341 (64)       |
| C12                          | 219 743             | 34 865   | 7 775    | 124 327 (43)          | 14 208 (59)      | 4 380 (44)       | 51 078 (77)            | 9 006 (74)       | 2 779 (64)       |
| C13                          | 259 394             | 41385    | 8 762    | 129 010 (50)          | 15 116 (63)      | 4 878 (44)       | 51 242 (80)            | 9 626 (77)       | 3 041 (65)       |
| C14                          | 284 427             | 45 779   | 9 597    | 147 608 (48)          | 17 210 (62)      | 5 477 (43)       | 56 467 (80)            | 10 783 (76)      | 3 344 (65)       |
| C15                          | 330 077             | 53 087   | 10 427   | 154 247 (53)          | 18 229 (66)      | 5 877 (44)       | 53 900 (84)            | 10 740 (80)      | 3 373 (68)       |
| C16                          | 331 121             | 54 074   | 10 739   | 170 204 (49)          | 19 910 (63)      | 6 195 (42)       | 53 066 (84)            | 10 906 (80)      | 3 367 (69)       |
| 1-alkene mechanisms (Us)     |                     |          |          |                       |                  |                  |                        |                  |                  |
| U5                           | 27 634              | 4 571    | 1 586    | 22 045 (20)           | 2 903 (36)       | 1 216 (23)       | 5 492 (80)             | 1 015 (78)       | 388 (76)         |
| U6                           | 59 906              | 9 912    | 3 062    | 44 085 (26)           | 5 663 (43)       | 2 177 (29)       | 16 853 (72)            | 2 948 (70)       | 1 058 (65)       |
| U7                           | 103 852             | 16 806   | 4 601    | 68 945 (34)           | 8 652 (49)       | 3 183 (31)       | 30 442 (71)            | 5 199 (69)       | 1 756 (62)       |
| U8                           | 166 821             | 27 221   | 6 836    | 102 271 (39)          | 12 700 (53)      | 4 423 (35)       | 46 112 (72)            | 7 729 (72)       | 2 548 (63)       |
| U9                           | 241 632             | 39 073   | 9 122    | 136 763 (43)          | 16 703 (57)      | 5 677 (38)       | 59 820 (75)            | 10 037 (74)      | 3 271 (64)       |
| U10                          | 334 311             | 54 066   | 11 898   | 178 535 (47)          | 21 749 (60)      | 7 231 (39)       | 73 455 (78)            | 12 409 (77)      | 3 965 (67)       |
| U11                          | 418 116             | 67 674   | 13 994   | 216 360 (48)          | 26 226 (61)      | 8 556 (39)       | 85 401 (80)            | 14 719 (78)      | 4 611 (67)       |
| U12                          | 492 809             | 79 824   | 15 753   | 234 329 (52)          | 28 369 (64)      | 9 270 (41)       | 88 461 (82)            | 15 312 (81)      | 4 821 (69)       |
| U13                          | 556 551             | 90 808   | 17 395   | 260 543 (53)          | 31 568 (65)      | 10 255 (41)      | 94 345 (83)            | 16 430 (82)      | 5 048 (71)       |
| U14                          | 595 837             | 98 055   | 18 316   | 261 810 (56)          | 31 979 (67)      | 10 437 (43)      | 88 731 (85)            | 15 686 (84)      | 4 871 (73)       |
| U15                          | 618 232             | 102 744  | 19 129   | 260 208 (58)          | 31 776 (69)      | 10 308 (46)      | 71 416 (88)            | 13 262 (87)      | 4 023 (79)       |
| U16                          | 649 901             | 108 583  | 19 649   | 270 059 (58)          | 32 927 (70)      | 10 548 (46)      | 43 028 (93)            | 8 433 (92)       | 2 659 (86)       |
| monoterpene mechanisms (MTs) |                     |          |          |                       |                  |                  |                        |                  |                  |
| API                          | 993 317             | 160 696  | 40 985   | 403 882 (59)          | 51 655 (68)      | 18 847 (54)      | 116 530 (88)           | 17 720 (89)      | 5 727 (86)       |
| BPI                          | 791 937             | 125 226  | 30 408   | 285 660 (64)          | 36 292 (71)      | 13 280 (56)      | 108 186 (86)           | 17 963 (86)      | 5 811 (81)       |
| LIM                          | 762 747             | 125 314  | 29 071   | 391 072 (49)          | 51 924 (59)      | 18 398 (37)      | 107 658 (86)           | 15 667 (87)      | 5 468 (81)       |
| CRN                          | 657 399             | 105 052  | 27 657   | 283 221 (57)          | 35 577 (66)      | 12 878 (53)      | 86 572 (87)            | 13 136 (87)      | 4 271 (85)       |
| CMP                          | 656 220             | 103 821  | 26 062   | 238 973 (64)          | 29 552 (72)      | 11 021 (58)      | 84 040 (87)            | 13 128 (87)      | 4 309 (83)       |

Table S4: Metrics for SOA and gas-phase quantities in TBR-reduced mechanisms, summarized by VOC class (Cs, Us, MTs) across scenarios (“sc.”). Scenario labels: “U” (urban), “R” (remote), “C” (continental), “P” (poll-cont), “RC” (remote-cont), “S” (simplified), “U0” (urban-nophot), “UH” (urban-highphot), “S0” (simpl-nophot), “SH” (simpl-highphot), and “D” (diurnal). Group label “T” denotes totals across VOC classes. Values are omitted for scenarios with fixed evaluated quantities. Mean values are reported for all quantities, including the evaluated metric (“mean”), reduction error (“rdc”), and normalized mean bias (“NMB”). For errors and bias, values are shown for both T6 and T10 mechanisms, separated by “/”.

| Item  | sc. | Cs   |         |            | Us   |          |            | MTs  |          |            | total |         |            |
|-------|-----|------|---------|------------|------|----------|------------|------|----------|------------|-------|---------|------------|
|       |     | mean | rdc     | NMB        | mean | rdc      | NMB        | mean | rdc      | NMB        | mean  | rdc     | NMB        |
| tSOA  | U   | 3.1  | 7/20    | -4.6/-16   | 47   | 0.6/16   | -0.3/-9    | 27   | 2.6/9    | -2.2/-6    | 26    | 3.4/15  | -2.4/-10   |
| tSOA  | R   | 2.9  | 0.8/6   | -0.4/-5    | 10   | 0.2/1.5  | -0.06/-1.2 | 13   | 1.7/15   | -1.5/-13   | 9     | 0.9/8   | -0.6/-7    |
| tSOA  | C   | 2.4  | 1.3/5   | -0.8/-4.6  | 11   | 0.2/9    | -0.01/-6   | 14   | 1.9/8    | -1.8/-7    | 9     | 1.1/8   | -0.9/-6    |
| tSOA  | P   | 3.3  | 1.6/8   | -1.1/-7    | 19   | 0.2/14   | -0.04/-8   | 18   | 2.9/9    | -2.6/-8    | 13    | 1.6/10  | -1.2/-7    |
| tSOA  | RC  | 2.7  | 0.8/4.7 | -0.4/-4    | 10   | 0.2/1.9  | -0.07/-1.5 | 13   | 1.6/11   | -1.4/-10   | 9     | 0.9/6   | -0.6/-5    |
| tSOA  | S   | 2.2  | 6/15    | -3/-12     | 40   | 0.2/16   | -0.04/-8   | 22   | 3/9      | -2.5/-7    | 21    | 3.2/13  | -1.8/-9    |
| tSOA  | U0  | 4.5  | 10/31   | -4.7/-22   | 49   | 0.8/16   | -0.2/-8    | 31   | 2.4/8    | -2.1/-4.3  | 28    | 4.5/18  | -2.3/-11   |
| tSOA  | UH  | 29   | 0.7/11  | 0.05/-9    | 30   | 1.3/10   | -0.2/-8    | 18   | 4.1/13   | -0.6/-11   | 26    | 2/11    | -0.2/-9    |
| tSOA  | S0  | 2.8  | 6/17    | -3.1/-13   | 45   | 0.2/15   | 0.02/-8    | 23   | 2.2/13   | -0.5/-7    | 24    | 2.7/15  | -1.2/-9    |
| tSOA  | SH  | 42   | 1.7/14  | 1.1/-11    | 47   | 3/19     | 1.7/-14    | 34   | 6/21     | -2.9/-17   | 41    | 3.7/18  | -0.04/-14  |
| tSOA  | D   | 0.4  | 2.4/10  | -1.6/-8    | 1.8  | 0.3/15   | -0.2/-9    | 6    | 1.5/8    | -1.5/-7    | 2.6   | 1.4/11  | -1.1/-8    |
| tSOA  | T   | 9    | 3.5/13  | -1.7/-10   | 28   | 0.7/12   | 0.04/-7    | 20   | 2.7/11   | -1.8/-9    | 19    | 2.1/12  | -0.9/-9    |
| OM:OC | U   | 1.7  | 1.6/1.5 | 1.2/0.9    | 2.1  | 0.06/0.6 | -0.01/0.03 | 2.6  | 0.3/1.1  | -0.2/-0.5  | 2.1   | 0.7/1   | 0.3/0.1    |
| OM:OC | R   | 1.6  | 2.4/2.5 | 1.2/1.1    | 1.8  | 0.08/0.7 | 0.04/-0.5  | 1.8  | 0.06/1.1 | -0.02/-0.9 | 1.7   | 0.9/1.4 | 0.4/-0.10  |
| OM:OC | C   | 1.7  | 0.7/0.8 | 0.4/0.5    | 2    | 0.06/0.8 | 0.03/-0.5  | 2.1  | 0.1/0.6  | 0.03/-0.3  | 1.9   | 0.3/0.7 | 0.2/-0.1   |
| OM:OC | P   | 1.8  | 0.6/0.7 | 0.4/0.5    | 2.1  | 0.04/0.5 | 0.01/0.1   | 2.3  | 0.3/0.9  | -0.2/-0.6  | 2     | 0.3/0.7 | 0.07/-0.02 |
| OM:OC | RC  | 1.6  | 2/2     | 1/0.9      | 1.8  | 0.08/0.8 | 0.04/-0.5  | 1.9  | 0.08/0.8 | -0.01/-0.6 | 1.7   | 0.7/1.2 | 0.3/-0.07  |
| OM:OC | S   | 1.6  | 1.6/1.5 | 1.2/0.8    | 2.1  | 0.05/0.6 | -0.00/0.2  | 2.4  | 0.6/1.3  | -0.4/-0.8  | 2.1   | 0.7/1.1 | 0.3/0.09   |
| OM:OC | U0  | 1.7  | 1.6/1.8 | 0.9/0.04   | 2.1  | 0.06/0.5 | 0.01/-0.2  | 2.7  | 0.4/1.2  | -0.05/-0.4 | 2.2   | 0.7/1.1 | 0.3/-0.2   |
| OM:OC | UH  | 2.1  | 0.2/0.8 | -0.01/-0.4 | 2.4  | 0.3/2.5  | -0.2/-1.9  | 2.7  | 0.8/3    | -0.6/-2.7  | 2.4   | 0.4/2.1 | -0.3/-1.6  |
| OM:OC | S0  | 1.6  | 1.5/1.7 | 0.9/0.6    | 2.1  | 0.03/0.3 | 0.02/0.2   | 2.3  | 0.1/2    | 0.01/-0.7  | 2     | 0.5/1.3 | 0.3/-0.01  |
| OM:OC | SH  | 2.2  | 1.7/3   | -0.9/-1.7  | 2.7  | 1.8/2.8  | -1.3/-1.8  | 2.9  | 2.5/2.8  | -1.9/-2.4  | 2.6   | 2/2.9   | -1.4/-2    |
| OM:OC | D   | 1.9  | 0.5/0.6 | 0.3/0.2    | 2.1  | 0.09/0.8 | 0.06/-0.4  | 2.3  | 0.3/0.6  | 0.2/-0.2   | 2.1   | 0.3/0.7 | 0.2/-0.1   |
| OM:OC | T   | 1.8  | 1.3/1.5 | 0.6/0.3    | 2.1  | 0.2/1    | -0.1/-0.5  | 2.4  | 0.5/1.4  | -0.3/-0.9  | 2     | 0.7/1.3 | 0.1/-0.3   |
| O:C   | U   | 0.4  | 5/4.9   | 3.1/1.9    | 0.6  | 0.1/1.1  | -0.01/0.02 | 1    | 0.6/2.2  | -0.3/-1.1  | 0.6   | 2/2.7   | 0.9/0.3    |
| O:C   | R   | 0.3  | 14/14   | 7/6        | 0.4  | 0.3/1.6  | 0.2/-1     | 0.5  | 0.2/3.1  | -0.03/-2.5 | 0.4   | 4.8/6   | 2.3/0.9    |

| Item | sc. | Cs      |         |            | Us      |          |            | MTs     |         |            | total   |         |           |
|------|-----|---------|---------|------------|---------|----------|------------|---------|---------|------------|---------|---------|-----------|
|      |     | mean    | rdc     | NMB        | mean    | rdc      | NMB        | mean    | rdc     | NMB        | mean    | rdc     | NMB       |
| O:C  | C   | 0.4     | 3.5/3.6 | 1.9/1.8    | 0.5     | 0.2/1.2  | 0.1/-0.5   | 0.7     | 0.2/1.3 | 0.03/-0.8  | 0.5     | 1.3/2   | 0.7/0.1   |
| O:C  | P   | 0.4     | 2.2/2.2 | 1.3/1.1    | 0.6     | 0.1/1    | 0.03/0.2   | 0.8     | 0.6/1.8 | -0.4/-1.4  | 0.6     | 1/1.7   | 0.3/-0.04 |
| O:C  | RC  | 0.3     | 11/12   | 6/5        | 0.4     | 0.3/1.6  | 0.2/-1     | 0.5     | 0.2/2.1 | -0.03/-1.7 | 0.4     | 4/5     | 1.9/0.9   |
| O:C  | S   | 0.3     | 6/6     | 3.8/2.5    | 0.6     | 0.1/1    | 0.01/0.3   | 0.8     | 1/2.7   | -0.7/-1.7  | 0.6     | 2.4/3.2 | 1/0.4     |
| O:C  | U0  | 0.4     | 5/6     | 2.8/-0.02  | 0.6     | 0.1/1.1  | 0.02/-0.3  | 1       | 0.6/2.1 | -0.1/-0.8  | 0.7     | 2/3     | 0.9/-0.4  |
| O:C  | UH  | 0.6     | 0.5/1.9 | -0.07/-1.1 | 0.8     | 0.6/4.5  | -0.4/-3.5  | 1       | 1.3/4.9 | -1/-4.4    | 0.8     | 0.8/3.7 | -0.5/-3   |
| O:C  | S0  | 0.3     | 6/6     | 3.3/1.5    | 0.6     | 0.10/0.7 | 0.05/0.4   | 0.8     | 0.2/3.6 | -0.01/-1.5 | 0.6     | 2/3.6   | 1.1/0.1   |
| O:C  | SH  | 0.7     | 3.4/7   | -2/-4.2    | 1       | 3.2/6    | -2.3/-4.2  | 1.2     | 4/5     | -3.1/-4.3  | 0.9     | 3.6/6   | -2.5/-4.3 |
| O:C  | D   | 0.5     | 1.8/2   | 0.8/0.5    | 0.6     | 0.3/1.6  | 0.2/-0.6   | 0.8     | 0.5/1.2 | 0.4/-0.7   | 0.6     | 0.9/1.6 | 0.5/-0.3  |
| O:C  | T   | 0.4     | 5/6     | 2.5/1.4    | 0.6     | 0.5/1.9  | -0.2/-0.9  | 0.8     | 0.8/2.7 | -0.5/-1.9  | 0.6     | 2.4/3.5 | 0.7/-0.3  |
| N:C  | U   | 0.04    | 10/11   | 6/7        | 0.1     | 0.1/1.1  | -0.02/-0.4 | 0.2     | 0.8/2.1 | -0.4/0.02  | 0.1     | 3.5/4.8 | 1.7/2.1   |
| N:C  | R   | 3.0e-03 | 1.6/4.2 | 0.4/3.4    | 3.1e-03 | 0.3/14   | 0.06/-4.9  | 2.8e-03 | 2.1/8   | -0.6/6     | 2.9e-03 | 1.4/9   | -0.06/1.4 |
| N:C  | C   | 0.04    | 1.4/2.3 | 0.9/1.8    | 0.07    | 0.2/6    | 0.09/-2.9  | 0.06    | 0.9/2.9 | 0.4/1.8    | 0.06    | 0.8/3.7 | 0.5/0.2   |
| N:C  | P   | 0.06    | 2/3.3   | 1.1/2.6    | 0.1     | 0.1/1.5  | 0.04/-0.07 | 0.1     | 0.8/2.8 | -0.3/-0.6  | 0.09    | 1/2.5   | 0.3/0.6   |
| N:C  | RC  | 7.6e-03 | 1.6/3.6 | 0.7/3.1    | 7.4e-03 | 0.3/13   | 0.06/-5    | 7.0e-03 | 1.8/4.9 | -0.3/3.9   | 7.3e-03 | 1.2/7   | 0.1/0.7   |
| N:C  | S   | 0.02    | 9/8     | 5/4.2      | 0.1     | 0.2/1.1  | -0.01/0.2  | 0.1     | 1.1/2.9 | -0.7/-0.2  | 0.09    | 3.6/4.2 | 1.5/1.4   |
| N:C  | U0  | 0.02    | 19/26   | 7/-1       | 0.1     | 0.1/2.2  | 0.03/-1.4  | 0.2     | 0.7/2.9 | 0.1/0.6    | 0.1     | 7/10    | 2.2/-0.6  |
| N:C  | UH  | 0.1     | 0.6/2.2 | -0.08/0.2  | 0.2     | 0.7/4.3  | -0.5/-3.4  | 0.2     | 2/7     | -1.7/-6    | 0.2     | 1.1/4.3 | -0.7/-3.1 |
| N:C  | S0  | 8.1e-03 | 30/41   | 11/0.6     | 0.1     | 0.08/0.9 | 0.04/-0.7  | 0.1     | 0.4/6   | 0.2/-0.3   | 0.08    | 10/16   | 3.8/-0.1  |
| N:C  | SH  | 0.1     | 4.6/4.9 | -2.5/-2.4  | 0.2     | 5/6      | -3.7/-1.1  | 0.2     | 5/5     | -3.7/-2    | 0.2     | 4.9/5   | -3.3/-1.8 |
| N:C  | D   | 0.10    | 1.7/2.6 | 0.6/1.7    | 0.1     | 0.4/3.6  | 0.2/-0.6   | 0.1     | 1.7/2.1 | 1.4/1.3    | 0.1     | 1.3/2.8 | 0.7/0.8   |
| N:C  | T   | 0.05    | 7/10    | 2.7/1.9    | 0.10    | 0.7/4.8  | -0.3/-1.8  | 0.1     | 1.6/4.2 | -0.5/0.4   | 0.09    | 3.3/7   | 0.7/-0.05 |
| -OOH | U   | 0.03    | 10/15   | 8/12       | 0.08    | 0.2/4.8  | 0.03/5     | 0.07    | 2/5     | -1.2/0.06  | 0.06    | 4.2/8   | 2.3/6     |
| -OOH | R   | 0.1     | 18/19   | 9/10       | 0.1     | 0.5/0.7  | 0.3/-0.1   | 0.1     | 0.7/4.3 | -0.5/1.6   | 0.1     | 6/8     | 3/3.7     |
| -OOH | C   | 0.06    | 7/8     | 4.4/4.8    | 0.10    | 0.4/3.3  | 0.2/3.4    | 0.09    | 1.9/3.7 | -1.4/-0.07 | 0.08    | 3.2/5   | 1/2.7     |
| -OOH | P   | 0.04    | 4.8/6   | 3.1/3.8    | 0.08    | 0.3/4.1  | 0.05/4.5   | 0.07    | 2.5/6   | -2/-1      | 0.06    | 2.6/5   | 0.4/2.4   |
| -OOH | RC  | 0.10    | 16/16   | 8/8        | 0.1     | 0.5/0.8  | 0.3/0.07   | 0.1     | 0.9/3   | -0.7/0.8   | 0.1     | 6/7     | 2.6/3.1   |
| -OOH | S   | 0.05    | 10/13   | 7/10       | 0.07    | 0.2/4.7  | 0.07/5     | 0.07    | 1.7/6   | -1.1/-1.8  | 0.06    | 4/8     | 2.1/4.5   |
| -OOH | U0  | 0.04    | 12/21   | 9/15       | 0.08    | 0.3/5    | 0.05/6     | 0.07    | 3.1/5   | -2.1/-0.6  | 0.06    | 5/10    | 2.4/7     |
| -OOH | UH  | 5.7e-05 | 1.3/4.4 | -0.2/-0.5  | 1.6e-03 | 3.9/9    | 3.1/7      | 9.9e-03 | 7/17    | 1.4/-6     | 3.8e-03 | 4.1/10  | 1.5/0.2   |
| -OOH | S0  | 0.06    | 10/12   | 7/9        | 0.08    | 0.2/5    | 0.06/6     | 0.08    | 1.8/3.9 | -1.3/0.5   | 0.07    | 3.8/7   | 1.8/5     |
| -OOH | SH  | 0.05    | 2.3/3.8 | 0.5/-2     | 0.07    | 3.6/15   | 1.9/-10    | 0.06    | 10/27   | -4/-17     | 0.06    | 5/15    | -0.5/-10  |

| Item             | sc. | Cs      |         |            | Us      |          |            | MTs     |         |           | total   |         |            |
|------------------|-----|---------|---------|------------|---------|----------|------------|---------|---------|-----------|---------|---------|------------|
|                  |     | mean    | rdc     | NMB        | mean    | rdc      | NMB        | mean    | rdc     | NMB       | mean    | rdc     | NMB        |
| -OOH             | D   | 0.02    | 5/6     | 3.2/3.5    | 0.06    | 0.7/3.9  | 0.1/1.4    | 0.07    | 7/11    | -5/-8     | 0.05    | 4.2/7   | -0.6/-1.1  |
| -OOH             | T   | 0.05    | 9/11    | 5/7        | 0.08    | 1/5      | 0.6/2.5    | 0.07    | 3.5/8   | -1.6/-2.8 | 0.07    | 4.4/8   | 2/3.1      |
| -ONO2            | U   | 0.03    | 12/14   | 8/10       | 0.1     | 0.1/0.8  | 0.02/-0.5  | 0.09    | 1/3     | -0.2/2.1  | 0.08    | 4.4/6   | 2.7/3.8    |
| -ONO2            | R   | 2.5e-03 | 1.8/4.3 | 0.5/3.5    | 2.4e-03 | 0.4/13   | 0.1/-7     | 1.5e-03 | 5/10    | -3.3/4.7  | 2.1e-03 | 2.5/9   | -0.9/0.6   |
| -ONO2            | C   | 0.04    | 1.8/2.5 | 1.1/1.9    | 0.06    | 0.3/7    | 0.2/-3.6   | 0.04    | 1.3/5   | 0.3/4.2   | 0.04    | 1.1/5   | 0.5/0.8    |
| -ONO2            | P   | 0.05    | 2.5/3.7 | 1.5/2.8    | 0.09    | 0.2/2.2  | 0.1/-0.5   | 0.07    | 1/3.7   | 0.2/2     | 0.07    | 1.2/3.2 | 0.6/1.4    |
| -ONO2            | RC  | 6.4e-03 | 1.9/3.9 | 0.8/3.3    | 5.8e-03 | 0.4/13   | 0.1/-6     | 4.0e-03 | 4.5/7   | -2.4/3.6  | 5.4e-03 | 2.3/8   | -0.5/0.2   |
| -ONO2            | S   | 0.02    | 11/9    | 7/4.5      | 0.1     | 0.1/0.9  | 0.03/-0.02 | 0.10    | 0.6/3.3 | 0.06/2.5  | 0.07    | 4/4.6   | 2.3/2.3    |
| -ONO2            | U0  | 2.9e-03 | 31/41   | 31/38      | 0.1     | 0.1/2.2  | 0.06/-1.4  | 0.08    | 1.3/6   | 0.8/4.7   | 0.06    | 11/16   | 11/14      |
| -ONO2            | UH  | 0.1     | 0.6/2.1 | 0.1/1      | 0.2     | 0.7/2.8  | -0.3/-2.1  | 0.2     | 1.4/6   | -1.1/-6   | 0.1     | 0.9/3.6 | -0.4/-2.2  |
| -ONO2            | S0  | 8.2e-04 | 58/59   | 45/48      | 0.1     | 0.10/1.3 | 0.05/-1    | 0.08    | 0.7/4.4 | 0.3/2.8   | 0.06    | 19/21   | 15/16      |
| -ONO2            | SH  | 0.1     | 2.7/3.3 | -1.3/-0.7  | 0.1     | 4/5      | -2.6/0.7   | 0.1     | 2.2/6   | -0.6/1.5  | 0.1     | 2.9/4.6 | -1.5/0.5   |
| -ONO2            | D   | 0.09    | 2.1/3.2 | 0.9/2.1    | 0.09    | 0.4/5    | 0.3/-1.2   | 0.09    | 1.8/2.2 | 1.4/1     | 0.09    | 1.4/3.5 | 0.9/0.7    |
| -ONO2            | T   | 0.04    | 11/13   | 9/10       | 0.09    | 0.6/4.8  | -0.2/-2    | 0.08    | 1.9/5   | -0.4/2.1  | 0.07    | 4.8/8   | 3/3.3      |
| OHR              | U   | 3.1     | 0.4/3.2 | -0.1/-2    | 3.5     | 3.1/9    | -1.3/-4    | 3.8     | 15/24   | -6/-8     | 3.4     | 6/12    | -2.4/-4.5  |
| OHR              | R   | 3       | 0.2/0.8 | 0.2/-0.3   | 8       | 0.2/0.9  | 0.08/-0.5  | 8       | 0.9/4.9 | -0.7/-3.1 | 7       | 0.4/2.2 | -0.1/-1.3  |
| OHR              | C   | 3       | 0.3/4.6 | 0.1/-2.7   | 8       | 0.3/1.5  | -0.01/-0.8 | 8       | 1.3/4.3 | -0.8/-2.8 | 6       | 0.6/3.5 | -0.2/-2.1  |
| OHR              | P   | 3.1     | 0.4/6   | -0.04/-3.5 | 7       | 0.7/3.3  | -0.2/-1.6  | 6       | 2.2/4.6 | -1/-2.6   | 5       | 1.1/4.5 | -0.4/-2.6  |
| OHR              | RC  | 3       | 0.2/1.2 | 0.2/-0.6   | 9       | 0.2/1    | 0.05/-0.5  | 8       | 0.9/4.2 | -0.7/-2.8 | 7       | 0.4/2.1 | -0.1/-1.3  |
| OHR              | S   | 3       | 0.3/2.7 | 0.09/-1.6  | 4.7     | 1.4/6    | -0.6/-2.7  | 5       | 5/10    | -2.5/-3.5 | 4.3     | 2.4/6   | -1/-2.6    |
| OHR              | U0  | 3       | 0.6/3.4 | -0.3/-2.2  | 2.7     | 2.3/6    | -1/-3.2    | 3       | 14/23   | -6/-8     | 2.9     | 6/11    | -2.4/-4.5  |
| OHR              | UH  | 2.6     | 1.3/12  | -0.4/-8    | 2.8     | 2/16     | -0.3/-4.9  | 2       | 7/17    | 0.02/-2.6 | 2.5     | 3.4/15  | -0.2/-5    |
| OHR              | S0  | 3       | 0.3/2.6 | 0.00/-1.7  | 3.9     | 0.8/4.4  | -0.4/-2.1  | 5       | 10/15   | -2.8/-2.7 | 4.1     | 3.6/7   | -1.1/-2.2  |
| OHR              | SH  | 1.4     | 9/30    | -0.6/-7    | 1.4     | 30/66    | -0.7/-3.2  | 1.2     | 13/97   | 1.2/-2.5  | 1.3     | 17/64   | -0.03/-4.2 |
| OHR              | D   | 0.2     | 0.4/6   | -0.3/-3.9  | 0.8     | 0.6/3.2  | -0.5/-2.4  | 2.4     | 2.7/5   | -2.1/-4.1 | 1.1     | 1.3/4.8 | -1/-3.5    |
| OHR              | T   | 2.6     | 1.2/7   | -0.1/-3    | 4.7     | 3.8/11   | -0.4/-2.4  | 4.9     | 7/19    | -1.9/-3.8 | 3.9     | 3.2/10  | -0.6/-2.9  |
| O <sub>3</sub> R | U   | 2.7e-10 | 5/49    | -1.1/6     | 3.0e-07 | 2.4/17   | -0.3/-0.8  | 4.3e-07 | 9/69    | 0.08/2.4  | 2.4e-07 | 5/45    | -0.4/2.4   |
| O <sub>3</sub> R | R   | 1.4e-10 | 0.8/28  | 0.5/-15    | 9.2e-07 | 0.3/0.9  | 0.2/-0.2   | 9.6e-07 | 0.4/5   | 0.00/-0.3 | 6.3e-07 | 0.5/11  | 0.2/-5     |
| O <sub>3</sub> R | C   | 1.0e-10 | 0.4/39  | -0.05/-4.7 | 8.7e-07 | 0.3/1.2  | 0.2/-0.2   | 8.9e-07 | 3/5     | 0.2/-0.09 | 5.8e-07 | 1.3/15  | 0.1/-1.7   |
| O <sub>3</sub> R | P   | 1.8e-10 | 0.6/43  | -0.3/1.1   | 6.6e-07 | 0.5/1.9  | 0.2/-0.2   | 7.6e-07 | 5/20    | 0.5/0.6   | 4.8e-07 | 2.1/22  | 0.1/0.5    |
| O <sub>3</sub> R | RC  | 1.1e-10 | 0.7/27  | 0.4/-15    | 9.3e-07 | 0.3/0.9  | 0.2/-0.2   | 9.6e-07 | 0.5/4.9 | 0.01/-0.3 | 6.3e-07 | 0.5/11  | 0.2/-5     |
| O <sub>3</sub> R | S   | 2.0e-10 | 4/47    | 0.7/11     | 4.9e-07 | 1/4.3    | -0.03/-0.8 | 6.0e-07 | 10/35   | 0.6/3.5   | 3.6e-07 | 5/29    | 0.4/4.5    |
| O <sub>3</sub> R | U0  | -       | -       | -          | 2.5e-07 | 1.2/24   | -0.2/-0.8  | 4.3e-07 | 2.3/19  | 0.05/2.5  | 3.4e-07 | 1.8/21  | -0.10/0.8  |

| Item               | sc. | Cs      |         |            | Us      |          |            | MTs     |          |           | total   |         |           |
|--------------------|-----|---------|---------|------------|---------|----------|------------|---------|----------|-----------|---------|---------|-----------|
|                    |     | mean    | rdc     | NMB        | mean    | rdc      | NMB        | mean    | rdc      | NMB       | mean    | rdc     | NMB       |
| O <sub>3</sub> R   | UH  | 5.1e-09 | 1.7/46  | 0.9/4.1    | 1.5e-07 | 7/27     | 1/2        | 3.3e-07 | 18/30    | 6/8       | 1.6e-07 | 9/34    | 2.6/4.7   |
| O <sub>3</sub> R   | SO  | -       | -       | -          | 4.4e-07 | 1.8/8    | -0.2/-1.3  | 6.0e-07 | 1.4/50   | 0.2/6     | 5.2e-07 | 1.6/29  | -0.02/2.4 |
| O <sub>3</sub> R   | SH  | 1.1e-09 | 17/65   | 2/-1.7     | 1.3e-07 | 45/82    | 0.6/1.5    | 2.8e-07 | 89/136   | 4.4/6     | 1.4e-07 | 50/94   | 2.4/1.9   |
| O <sub>3</sub> R   | D   | 4.8e-11 | 1.4/45  | -1/6       | 9.2e-08 | 0.01/0.3 | -0.01/-0.3 | 7.7e-07 | 0.03/0.2 | -0.02/0.1 | 2.9e-07 | 0.5/15  | -0.4/2    |
| O <sub>3</sub> R   | T   | 8.1e-10 | 3.5/43  | 0.2/-1     | 4.7e-07 | 5/15     | 0.2/-0.1   | 6.4e-07 | 13/34    | 1.1/2.6   | 3.3e-07 | 6/29    | 0.4/0.08  |
| NO <sub>3</sub> R  | U   | 2.2e-04 | 1.1/14  | -0.5/-9    | 1.9e-03 | 4.2/19   | -1.1/-4.9  | 0.06    | 11/17    | 0.2/8     | 0.02    | 5/17    | -0.5/-2.1 |
| NO <sub>3</sub> R  | R   | 1.5e-03 | 0.1/17  | 0.09/20    | 6.0e-03 | 0.4/2.9  | -0.09/-1.6 | 0.1     | 1/10     | 0.2/1.4   | 0.05    | 0.5/10  | 0.07/7    |
| NO <sub>3</sub> R  | C   | 3.7e-04 | 0.3/13  | -0.07/-8   | 5.3e-03 | 0.6/3.8  | -0.2/-1.9  | 0.1     | 2.3/7    | 0.3/-0.5  | 0.04    | 1/8     | 0.00/-3.4 |
| NO <sub>3</sub> R  | P   | 3.4e-04 | 0.6/18  | -0.3/-11   | 4.4e-03 | 1/8      | -0.3/-3.5  | 0.1     | 2.3/9    | 0.7/1.3   | 0.04    | 1.3/12  | 0.00/-4.4 |
| NO <sub>3</sub> R  | RC  | 1.3e-03 | 0.1/11  | 0.08/6     | 6.0e-03 | 0.4/2.5  | -0.1/-1.4  | 0.1     | 0.8/7    | 0.2/-0.09 | 0.05    | 0.5/7   | 0.05/1.5  |
| NO <sub>3</sub> R  | S   | 2.1e-04 | 0.9/12  | 0.2/-8     | 2.9e-03 | 2/14     | -0.6/-4.8  | 0.08    | 4.7/18   | 0.8/8     | 0.03    | 2.5/15  | 0.1/-1.4  |
| NO <sub>3</sub> R  | U0  | 2.5e-04 | 1.2/16  | -0.7/-10   | 1.5e-03 | 4.3/17   | -0.6/-3.4  | 0.06    | 11/22    | 0.2/8     | 0.02    | 5/18    | -0.4/-1.7 |
| NO <sub>3</sub> R  | UH  | 9.4e-04 | 5/43    | -3.4/-26   | 2.4e-03 | 7/47     | -3/-24     | 0.04    | 15/31    | 4.9/5     | 0.01    | 9/40    | -0.5/-15  |
| NO <sub>3</sub> R  | SO  | 2.6e-04 | 0.7/12  | 0.1/-8     | 2.5e-03 | 1.6/8    | -0.4/-2.8  | 0.08    | 4/34     | 0.7/17    | 0.03    | 2.1/18  | 0.2/2     |
| NO <sub>3</sub> R  | SH  | 1.3e-03 | 9/35    | 1.3/-5     | 1.6e-03 | 16/57    | 0.6/-15    | 0.03    | 8/73     | 4.4/4.1   | 0.01    | 11/55   | 2.1/-5    |
| NO <sub>3</sub> R  | D   | 6.0e-05 | 0.5/15  | -0.5/-10   | 6.4e-04 | 1.5/11   | -1.1/-9    | 0.06    | 0.1/0.7  | 0.02/-0.5 | 0.02    | 0.7/9   | -0.5/-7   |
| NO <sub>3</sub> R  | T   | 6.2e-04 | 1.8/19  | -0.3/-6    | 3.2e-03 | 3.5/17   | -0.6/-7    | 0.08    | 5/21     | 1.1/4.7   | 0.02    | 3.1/19  | -0.2/-4.5 |
| OHR-r              | U   | 0.8     | 3.1/16  | -1.2/-10   | 1.8     | 2.8/8    | -1.7/-5    | 2.5     | 14/16    | -6/-7     | 1.7     | 7/14    | -2.9/-7   |
| OHR-r              | R   | 0.6     | 0.2/2.1 | 0.08/-1.9  | 3.8     | 0.3/1.3  | -0.04/-1   | 4.3     | 1.1/12   | -0.9/-9   | 2.9     | 0.5/5   | -0.3/-4.1 |
| OHR-r              | C   | 0.5     | 0.4/11  | -0.3/-8    | 3.8     | 0.4/2.1  | -0.2/-1.6  | 4.1     | 1.3/4.3  | -1.1/-3.2 | 2.8     | 0.7/6   | -0.5/-4.2 |
| OHR-r              | P   | 0.8     | 0.7/14  | -0.5/-9    | 3.4     | 0.9/3.8  | -0.5/-2.8  | 3.5     | 2/7      | -1.4/-3.5 | 2.5     | 1.2/8   | -0.8/-5   |
| OHR-r              | RC  | 0.5     | 0.3/3.3 | 0.1/-2.8   | 3.8     | 0.3/1.3  | -0.09/-1   | 4.4     | 0.9/6    | -0.8/-4.7 | 2.9     | 0.5/3.5 | -0.3/-2.8 |
| OHR-r              | S   | 0.6     | 2.8/16  | 0.4/-10    | 2.2     | 1.4/6    | -1/-4      | 3.5     | 4.3/12   | -1.9/-3.8 | 2.1     | 2.8/11  | -0.8/-6   |
| OHR-r              | U0  | 1.1     | 2.7/14  | -0.7/-7    | 1.4     | 2.4/6    | -1.5/-4.6  | 2       | 15/17    | -8/-10    | 1.5     | 7/12    | -3.4/-7   |
| OHR-r              | UH  | 1.8     | 1.2/17  | -0.4/-10   | 1.8     | 1.3/13   | 0.1/-4.4   | 1.1     | 9/11     | 1/2.5     | 1.6     | 3.7/13  | 0.3/-4    |
| OHR-r              | SO  | 0.8     | 1.6/14  | 0.2/-9     | 1.7     | 0.8/4.7  | -0.6/-3    | 3.9     | 10/16    | -2.9/-4.6 | 2.1     | 4/12    | -1.1/-5   |
| OHR-r              | SH  | 0.8     | 10/27   | -0.7/-9    | 0.8     | 30/65    | -1.2/-4.8  | 0.6     | 17/85    | 1/-2      | 0.7     | 19/59   | -0.3/-5   |
| OHR-r              | D   | 0.05    | 1.1/16  | -0.8/-11   | 0.3     | 1.1/5    | -0.9/-4.6  | 1.4     | 2.6/4.7  | -2.3/-4.2 | 0.6     | 1.6/9   | -1.3/-7   |
| OHR-r              | T   | 0.8     | 2.2/14  | -0.3/-8    | 2.3     | 3.8/11   | -0.7/-3.4  | 2.8     | 7/17     | -2.1/-4.5 | 1.7     | 3.7/13  | -0.8/-5   |
| O <sub>3</sub> R-r | U   | 2.7e-10 | 5/49    | -1.1/6     | 3.9e-09 | 1/22     | -0.5/-9    | 4.8e-08 | 9/69     | 3.6/-9    | 1.7e-08 | 5/46    | 0.7/-4.3  |
| O <sub>3</sub> R-r | R   | 1.4e-10 | 0.8/28  | 0.5/-15    | 2.7e-08 | 0.2/9    | 0.01/-4.9  | 1.5e-07 | 1.3/25   | -0.7/-15  | 5.9e-08 | 0.8/20  | -0.06/-12 |
| O <sub>3</sub> R-r | C   | 1.0e-10 | 0.4/39  | -0.05/-4.7 | 2.3e-08 | 0.3/14   | -0.05/-7   | 1.3e-07 | 2/6      | -0.2/-3.2 | 5.2e-08 | 0.9/20  | -0.1/-5   |
| O <sub>3</sub> R-r | P   | 1.8e-10 | 0.6/43  | -0.3/1.1   | 1.7e-08 | 0.4/19   | -0.03/-9   | 1.0e-07 | 4.9/21   | 1.2/-2.1  | 4.0e-08 | 2/27    | 0.3/-3.4  |

| Item                | sc. | Cs      |         |            | Us      |          |           | MTs     |         |           | total   |         |           |
|---------------------|-----|---------|---------|------------|---------|----------|-----------|---------|---------|-----------|---------|---------|-----------|
|                     |     | mean    | rdc     | NMB        | mean    | rdc      | NMB       | mean    | rdc     | NMB       | mean    | rdc     | NMB       |
| O <sub>3</sub> R-r  | RC  | 1.1e-10 | 0.7/27  | 0.4/-15    | 2.6e-08 | 0.2/9    | -0.02/-5  | 1.5e-07 | 1/11    | -0.5/-7   | 5.9e-08 | 0.6/16  | -0.03/-9  |
| O <sub>3</sub> R-r  | S   | 2.0e-10 | 4/47    | 0.7/11     | 7.6e-09 | 0.6/19   | -0.2/-9   | 8.6e-08 | 10/32   | 4.3/1.4   | 3.1e-08 | 4.7/33  | 1.6/1.1   |
| O <sub>3</sub> R-r  | U0  | -       | -       | -          | 1.9e-09 | 1.2/24   | -0.3/-8   | 8.2e-08 | 3.9/29  | -1.4/-7   | 4.2e-08 | 2.5/26  | -0.9/-7   |
| O <sub>3</sub> R-r  | UH  | 5.1e-09 | 1.7/46  | 0.9/4.1    | 1.7e-08 | 7/39     | 3.1/-9    | 3.5e-08 | 18/32   | 15/26     | 1.9e-08 | 9/39    | 6/7       |
| O <sub>3</sub> R-r  | S0  | -       | -       | -          | 3.0e-09 | 0.4/8    | -0.1/-2.2 | 1.6e-07 | 1.6/33  | -1.5/-6   | 7.9e-08 | 1/21    | -0.8/-3.9 |
| O <sub>3</sub> R-r  | SH  | 1.1e-09 | 17/65   | 2/-1.7     | 7.0e-09 | 45/82    | 1.2/-12   | 2.5e-08 | 89/136  | 15/25     | 1.1e-08 | 50/94   | 6/3.9     |
| O <sub>3</sub> R-r  | D   | 4.8e-11 | 1.4/45  | -1/6       | 3.2e-09 | 0.2/18   | -0.2/-11  | 1.0e-07 | 0.5/3.3 | -0.1/-1.2 | 3.6e-08 | 0.7/22  | -0.5/-2   |
| O <sub>3</sub> R-r  | T   | 8.1e-10 | 3.5/43  | 0.2/-1     | 1.2e-08 | 5/24     | 0.3/-8    | 9.6e-08 | 14/37   | 3.6/0.7   | 2.3e-08 | 6/33    | 0.8/-3.8  |
| NO <sub>3</sub> R-r | U   | 1.7e-04 | 1.5/19  | -0.8/-12   | 1.2e-03 | 4.2/20   | -1.4/-7   | 0.02    | 10/25   | 0.3/20    | 5.7e-03 | 5/21    | -0.6/0.4  |
| NO <sub>3</sub> R-r | R   | 1.5e-03 | 0.1/18  | 0.09/21    | 3.8e-03 | 0.5/3.4  | -0.3/-2.4 | 0.02    | 2.5/22  | 1.2/10    | 8.8e-03 | 1/14    | 0.4/9     |
| NO <sub>3</sub> R-r | C   | 3.2e-04 | 0.3/13  | -0.1/-8    | 3.3e-03 | 0.7/4.5  | -0.4/-3   | 0.02    | 2.4/9   | 1.2/-0.3  | 6.2e-03 | 1.1/9   | 0.2/-3.8  |
| NO <sub>3</sub> R-r | P   | 2.9e-04 | 0.7/20  | -0.4/-12   | 2.8e-03 | 1.1/9    | -0.6/-5   | 0.02    | 3.4/14  | 2.2/7     | 6.6e-03 | 1.7/14  | 0.4/-3.2  |
| NO <sub>3</sub> R-r | RC  | 1.3e-03 | 0.1/11  | 0.08/6     | 3.8e-03 | 0.5/2.9  | -0.3/-2   | 0.02    | 2.5/17  | 1.4/5     | 7.6e-03 | 1/10    | 0.4/3.1   |
| NO <sub>3</sub> R-r | S   | 1.6e-04 | 1.2/17  | 0.3/-10    | 1.8e-03 | 2.1/16   | -1/-7     | 0.02    | 4.6/28  | 1.3/24    | 7.9e-03 | 2.6/20  | 0.2/2.3   |
| NO <sub>3</sub> R-r | U0  | 2.1e-04 | 1.3/19  | -0.8/-12   | 8.8e-04 | 4.4/17   | -0.8/-4.8 | 0.02    | 11/26   | 0.4/23    | 5.4e-03 | 6/21    | -0.4/2    |
| NO <sub>3</sub> R-r | UH  | 9.1e-04 | 5/44    | -3.5/-27   | 2.1e-03 | 7/49     | -3.7/-30  | 3.6e-03 | 14/34   | 0.00/-3.1 | 2.2e-03 | 9/42    | -2.4/-20  |
| NO <sub>3</sub> R-r | S0  | 2.1e-04 | 0.9/15  | 0.2/-10    | 1.5e-03 | 1.7/8    | -0.5/-3.7 | 0.03    | 4.4/48  | 1.5/39    | 9.3e-03 | 2.3/24  | 0.4/9     |
| NO <sub>3</sub> R-r | SH  | 1.1e-03 | 9/35    | 0.7/-4.1   | 1.2e-03 | 17/57    | -0.05/-19 | 2.5e-03 | 13/67   | 4.8/-9    | 1.6e-03 | 13/53   | 1.8/-11   |
| NO <sub>3</sub> R-r | D   | 5.8e-05 | 0.6/15  | -0.5/-10   | 4.2e-04 | 2/16     | -1.7/-13  | 7.9e-03 | 1.1/7   | 0.2/-4.3  | 2.8e-03 | 1.2/12  | -0.6/-9   |
| NO <sub>3</sub> R-r | T   | 5.6e-04 | 2/21    | -0.4/-7    | 2.1e-03 | 3.8/18   | -1/-9     | 0.01    | 6/27    | 1.3/10    | 3.6e-03 | 3.5/21  | -0.4/-4.8 |
| NO <sub>x</sub>     | S   | 15      | 2/2.9   | -0.7/0.7   | 10      | 0.4/1.7  | 0.2/0.4   | 8       | 5/13    | 1.6/5     | 11      | 2.5/6   | 0.4/2.2   |
| NO <sub>x</sub>     | S0  | 13      | 2.2/4.1 | -0.6/1.7   | 10      | 0.3/0.7  | 0.1/-0.3  | 8       | 1.5/14  | 0.6/8     | 10      | 1.3/6   | 0.04/3.2  |
| NO <sub>x</sub>     | SH  | 3.3     | 14/17   | -1/1.7     | 2.2     | 16/17    | -2.2/0.5  | 1.7     | 20/27   | 1.3/4.6   | 2.4     | 17/20   | -0.6/2.3  |
| NO <sub>x</sub>     | T   | 10      | 6/8     | -0.8/1.4   | 7       | 6/6      | -0.6/0.2  | 6       | 9/18    | 1.2/6     | 8       | 6/9     | -0.4/1.7  |
| O <sub>3</sub>      | S   | 23      | 0.9/1.3 | 0.2/-0.3   | 25      | 0.7/2.6  | -0.4/-1.4 | 33      | 6/10    | -3.9/-6   | 27      | 2.5/4.7 | -1.3/-2.7 |
| O <sub>3</sub>      | S0  | 16      | 1.9/3.5 | 0.5/-0.4   | 16      | 0.09/0.6 | -0.03/0.2 | 16      | 0.3/7   | -0.1/-3   | 16      | 0.8/3.6 | 0.09/-1.1 |
| O <sub>3</sub>      | SH  | 75      | 4.9/14  | -3.1/-10   | 83      | 8/13     | -4.9/-9   | 88      | 11/23   | -8/-16    | 82      | 8/17    | -5/-12    |
| O <sub>3</sub>      | T   | 38      | 2.6/6   | -0.8/-3.6  | 41      | 2.8/5    | -1.8/-3.5 | 46      | 6/13    | -4.1/-8   | 41      | 3.2/7   | -1.8/-4.4 |
| HO <sub>2</sub>     | U   | 8.1e-04 | 2.5/10  | -0.9/-5    | 1.7e-03 | 8/22     | -3.3/-7   | 1.3e-03 | 40/58   | -24/-34   | 1.3e-03 | 17/30   | -9/-16    |
| HO <sub>2</sub>     | R   | 7.9e-04 | 0.1/9   | -0.07/-2.9 | 2.2e-03 | 0.5/1.5  | -0.3/0.8  | 2.0e-03 | 7/24    | -3.6/-7   | 1.7e-03 | 2.5/11  | -1.3/-3.1 |
| HO <sub>2</sub>     | C   | 1.2e-03 | 0.4/3.1 | -0.2/-0.2  | 2.4e-03 | 0.8/2    | -0.4/-0.3 | 2.1e-03 | 9/15    | -6/-11    | 1.9e-03 | 3.4/7   | -2.3/-3.9 |
| HO <sub>2</sub>     | P   | 1.3e-03 | 1/11    | -0.6/-5    | 2.3e-03 | 2.3/6    | -1.4/-3.1 | 2.1e-03 | 19/29   | -13/-20   | 1.9e-03 | 7/15    | -5/-10    |
| HO <sub>2</sub>     | RC  | 7.2e-04 | 0.1/6   | -0.06/-0.7 | 2.1e-03 | 0.4/1.7  | -0.2/0.8  | 1.9e-03 | 7/18    | -4/-8     | 1.6e-03 | 2.7/9   | -1.4/-2.5 |

| Item            | sc. | Cs      |         |            | Us      |         |           | MTs     |       |         | total   |       |          |
|-----------------|-----|---------|---------|------------|---------|---------|-----------|---------|-------|---------|---------|-------|----------|
|                 |     | mean    | rdc     | NMB        | mean    | rdc     | NMB       | mean    | rdc   | NMB     | mean    | rdc   | NMB      |
| HO <sub>2</sub> | S   | 7.4e-04 | 1.4/8   | 0.03/-4.3  | 1.8e-03 | 3.6/11  | -2/-4.1   | 1.7e-03 | 28/41 | -22/-31 | 1.4e-03 | 11/20 | -8/-13   |
| HO <sub>2</sub> | U0  | 1.3e-03 | 2.8/13  | -1.4/-7    | 1.8e-03 | 6/18    | -1.7/-4.1 | 1.4e-03 | 40/68 | -24/-35 | 1.5e-03 | 16/33 | -9/-16   |
| HO <sub>2</sub> | UH  | 2.9e-04 | 3.2/26  | -2/-15     | 3.5e-04 | 7/35    | -4.4/-18  | 2.9e-04 | 25/62 | -18/-36 | 3.1e-04 | 12/41 | -8/-23   |
| HO <sub>2</sub> | S0  | 1.2e-03 | 1.1/8   | -0.00/-4.9 | 2.0e-03 | 0.8/4.4 | -0.2/0.7  | 1.1e-03 | 18/45 | -14/-28 | 1.4e-03 | 7/19  | -4.7/-11 |
| HO <sub>2</sub> | SH  | 0.02    | 3.4/32  | -2.9/-19   | 0.02    | 6/21    | -4.9/-15  | 0.02    | 15/37 | -9/-27  | 0.02    | 8/30  | -6/-20   |
| HO <sub>2</sub> | D   | 3.5e-04 | 0.4/3.5 | -0.3/-2.6  | 1.2e-03 | 1.4/6   | -1.1/-4.3 | 1.9e-03 | 14/22 | -11/-17 | 1.2e-03 | 5/10  | -4.3/-8  |
| HO <sub>2</sub> | T   | 2.2e-03 | 1.5/12  | -0.8/-6    | 3.3e-03 | 3.4/12  | -1.8/-4.8 | 3.3e-03 | 20/38 | -14/-23 | 2.8e-03 | 6/16  | -3.4/-9  |

Table S5: Metrics for SOA and gas-phase quantities in TBR-reduced mechanisms, reported for individual PVOCs. The same metrics and reporting format as in Table S4 are used.

| PVOC | Evaluation target |         |            |              |         |            |            |         |            |
|------|-------------------|---------|------------|--------------|---------|------------|------------|---------|------------|
|      | mean              | rdc     | NMB        | mean         | rdc     | NMB        | mean       | rdc     | NMB        |
|      | <b>tSOA</b>       |         |            | <b>OM:OC</b> |         |            | <b>O:C</b> |         |            |
| C7L  | 0.3               | 9/53    | -6/-39     | 2.3          | 2.4/3   | 1.4/1.5    | 0.8        | 5/6     | 3/2.8      |
| C8L  | 0.8               | 9/15    | -6/-12     | 2.1          | 1.8/1.8 | 1/0.3      | 0.6        | 4.4/4.2 | 2.6/0.8    |
| C9L  | 1.7               | 5/10    | -3.1/-9    | 2            | 1.3/1.5 | 0.7/-0.07  | 0.5        | 3.6/3.9 | 2.1/0.04   |
| C10L | 3.2               | 1.8/19  | 0.05/-15   | 1.8          | 0.3/0.8 | -0.04/-0.2 | 0.5        | 0.6/2.3 | -0.03/-1.4 |
| C11L | 5                 | 0.9/12  | -0.2/-10   | 1.7          | 1.1/1.2 | 0.4/0.2    | 0.4        | 4.2/4.8 | 1.7/0.7    |
| C12L | 8                 | 1/6     | 0.08/-5    | 1.7          | 1.1/1.2 | 0.4/0.2    | 0.3        | 4.8/5   | 1.9/1      |
| C13L | 11                | 1.1/5   | -0.4/-4.7  | 1.6          | 1.2/1.3 | 0.4/0.1    | 0.3        | 6/6     | 2.2/1      |
| C14L | 14                | 1.5/3.3 | 0.4/-2.9   | 1.5          | 1.2/1.3 | 0.5/0.2    | 0.3        | 7/7     | 3/1.7      |
| C15L | 18                | 1.8/2.1 | -0.6/-1.2  | 1.5          | 1.4/1.5 | 0.5/0.3    | 0.2        | 8/9     | 3.4/2.7    |
| C16L | 24                | 2.9/3   | -1.1/-1.6  | 1.4          | 1.4/1.6 | 0.6/0.5    | 0.2        | 11/11   | 5/4.5      |
| U5L  | 1.1               | 1.6/113 | -0.4/-63   | 3.2          | 0.2/5   | 0.1/-1.2   | 1.3        | 0.4/8   | 0.2/-1.1   |
| U6L  | 2.1               | 1.4/8   | 0.4/-5     | 2.8          | 0.3/1.3 | -0.2/-0.8  | 1.1        | 0.3/2.3 | -0.2/-1.7  |
| U7L  | 4.3               | 1.4/6   | 0.4/-4.8   | 2.5          | 0.3/0.9 | -0.2/-0.8  | 0.9        | 0.5/1.9 | -0.3/-1.5  |
| U8L  | 7                 | 0.7/3.5 | 0.01/-3.1  | 2.3          | 0.2/0.6 | -0.1/-0.5  | 0.8        | 0.3/1.3 | -0.2/-1.1  |
| U9L  | 12                | 0.5/2.1 | 0.00/-1.2  | 2.1          | 0.2/0.7 | -0.1/-0.5  | 0.6        | 0.3/1.3 | -0.2/-1    |
| U10L | 19                | 0.4/2.3 | -0.1/-1.8  | 2            | 0.2/0.6 | -0.2/-0.5  | 0.6        | 0.4/1.4 | -0.3/-1    |
| U11L | 29                | 0.3/1.7 | -0.07/-1.4 | 1.9          | 0.2/0.4 | -0.1/-0.3  | 0.5        | 0.4/0.9 | -0.3/-0.7  |
| U12L | 38                | 0.3/1.7 | -0.2/-1.4  | 1.8          | 0.2/0.4 | -0.2/-0.3  | 0.4        | 0.5/0.9 | -0.3/-0.7  |

| PVOC | Evaluation target |         |            |      |         |            |       |         |            |
|------|-------------------|---------|------------|------|---------|------------|-------|---------|------------|
|      | mean              | rdc     | NMB        | mean | rdc     | NMB        | mean  | rdc     | NMB        |
| U13L | 46                | 0.3/1.9 | -0.2/-1.5  | 1.8  | 0.2/0.4 | -0.1/-0.2  | 0.4   | 0.5/0.9 | -0.2/-0.6  |
| U14L | 53                | 0.2/1.5 | 0.09/-1.1  | 1.7  | 0.2/0.3 | -0.10/-0.2 | 0.4   | 0.5/0.9 | -0.2/-0.5  |
| U15L | 60                | 0.4/1.7 | 0.2/-1.3   | 1.7  | 0.3/0.4 | -0.08/-0.2 | 0.3   | 0.8/1.3 | -0.1/-0.6  |
| U16L | 66                | 0.5/1.2 | 0.4/-0.6   | 1.6  | 0.4/0.6 | -0.02/-0.2 | 0.3   | 1.3/2.1 | 0.09/-0.5  |
| APIL | 16                | 1.6/11  | -1.2/-9    | 2.3  | 0.3/0.8 | -0.2/-0.5  | 0.8   | 0.5/1.5 | -0.4/-1    |
| BPIL | 23                | 4.2/7   | -3.3/-3.6  | 2.3  | 0.7/1.2 | -0.4/-0.6  | 0.8   | 1.2/2.2 | -0.7/-1.2  |
| CMPL | 21                | 2.9/11  | -1.6/-8    | 2.5  | 0.7/1.9 | -0.3/-1.2  | 0.9   | 1.1/3.6 | -0.6/-2.4  |
| LIML | 33                | 3.3/9   | -1.3/-8    | 2.4  | 0.3/1.4 | -0.2/-1.1  | 0.9   | 0.5/2.7 | -0.3/-2.1  |
| CRNL | 7                 | 1.8/18  | -1.5/-15   | 2.3  | 0.5/1.6 | -0.3/-1.3  | 0.8   | 0.8/3.6 | -0.4/-2.9  |
|      | N:C               |         |            | -OOH |         |            | -ONO2 |         |            |
| C7L  | 0.1               | 6/11    | 2.2/7      | 0.1  | 14/15   | 12/13      | 0.08  | 12/18   | 11/16      |
| C8L  | 0.09              | 6/6     | 2.5/0.1    | 0.09 | 12/12   | 9/9        | 0.07  | 10/10   | 8/8        |
| C9L  | 0.07              | 5/10    | 2.5/-3.9   | 0.08 | 8/9     | 6/7        | 0.06  | 8/7     | 6/6        |
| C10L | 0.05              | 1.5/7   | -0.3/3.1   | 0.06 | 1.3/14  | 0.4/10     | 0.05  | 1.4/12  | -0.6/6     |
| C11L | 0.04              | 7/10    | 2.5/4.3    | 0.05 | 5/12    | 2.5/8      | 0.04  | 12/15   | 10/14      |
| C12L | 0.04              | 8/10    | 2.9/2      | 0.04 | 6/7     | 2.4/4.7    | 0.03  | 12/13   | 9/11       |
| C13L | 0.03              | 8/10    | 2.8/1.8    | 0.03 | 7/8     | 3.4/2.1    | 0.03  | 12/12   | 9/10       |
| C14L | 0.03              | 8/9     | 3.3/1.3    | 0.02 | 9/10    | 4.3/2      | 0.03  | 12/13   | 8/9        |
| C15L | 0.02              | 10/11   | 3.1/1.2    | 0.02 | 12/12   | 6/3.5      | 0.02  | 15/15   | 10/10      |
| C16L | 0.02              | 14/15   | 5/2.2      | 0.01 | 15/15   | 8/7        | 0.02  | 19/19   | 15/14      |
| U5L  | 0.2               | 0.6/41  | 0.2/-20    | 0.2  | 2.3/38  | 2/34       | 0.2   | 0.6/46  | 0.3/-24    |
| U6L  | 0.2               | 0.8/3.6 | -0.5/0.6   | 0.2  | 1.2/9   | 1/-1.6     | 0.2   | 0.8/3.4 | -0.3/1.1   |
| U7L  | 0.1               | 1/2.2   | -0.5/0.1   | 0.1  | 1/1.6   | 0.7/0.5    | 0.1   | 1/2.2   | -0.4/1     |
| U8L  | 0.1               | 0.6/1.3 | -0.4/-0.3  | 0.10 | 0.6/1.1 | 0.5/0.1    | 0.1   | 0.5/1   | -0.3/0.2   |
| U9L  | 0.1               | 0.6/1.5 | -0.4/-0.8  | 0.08 | 0.8/1.6 | 0.5/-0.4   | 0.09  | 0.5/0.9 | -0.3/-0.6  |
| U10L | 0.09              | 0.7/1.2 | -0.5/-0.7  | 0.06 | 0.5/1   | 0.2/-0.2   | 0.08  | 0.5/0.6 | -0.3/-0.5  |
| U11L | 0.08              | 0.6/0.9 | -0.4/-0.4  | 0.05 | 0.5/0.9 | 0.3/-0.2   | 0.07  | 0.4/0.6 | -0.2/-0.4  |
| U12L | 0.07              | 0.6/1   | -0.4/-0.2  | 0.05 | 0.4/1   | 0.1/-0.4   | 0.06  | 0.4/0.5 | -0.2/-0.3  |
| U13L | 0.06              | 0.6/1   | -0.3/0.04  | 0.04 | 0.6/1.2 | 0.2/-0.5   | 0.05  | 0.4/0.4 | -0.1/-0.2  |
| U14L | 0.05              | 0.6/1   | -0.4/-0.07 | 0.04 | 0.6/1   | 0.3/-0.2   | 0.05  | 0.5/0.7 | -0.2/-0.4  |
| U15L | 0.05              | 0.7/1.2 | -0.3/-0.08 | 0.03 | 0.9/2.3 | 0.3/-0.3   | 0.04  | 0.6/0.7 | -0.1/-0.1  |
| U16L | 0.05              | 1/1.6   | -0.1/-0.04 | 0.03 | 2.4/3.8 | 0.6/-0.3   | 0.04  | 1.1/1.3 | -0.00/-0.2 |
| APIL | 0.1               | 1/4.6   | -0.5/2.7   | 0.09 | 1/2.9   | 0.2/2.5    | 0.05  | 1.1/4.6 | -0.4/2.6   |

| PVOC | Evaluation target |         |             |                  |         |            |                   |         |           |
|------|-------------------|---------|-------------|------------------|---------|------------|-------------------|---------|-----------|
|      | mean              | rdc     | NMB         | mean             | rdc     | NMB        | mean              | rdc     | NMB       |
| BPIL | 0.1               | 2/3.4   | -0.06/-0.3  | 0.04             | 9/12    | -4.4/-8    | 0.08              | 1.7/3.1 | 0.9/0.5   |
| CMPL | 0.1               | 1.9/6   | -0.4/0.4    | 0.04             | 6/14    | -3.6/-8    | 0.1               | 1.3/5   | 0.4/2.3   |
| LIML | 0.1               | 1.8/2.6 | -1.2/-0.9   | 0.09             | 1.4/6   | -0.6/2.2   | 0.07              | 3.9/5   | -3/0.6    |
| CRNL | 0.1               | 1.2/3.9 | -0.4/0.05   | 0.10             | 0.5/7   | 0.3/-3.4   | 0.06              | 1.7/7   | 0.01/4.6  |
|      | OHR               |         |             | O <sub>3</sub> R |         |            | NO <sub>3</sub> R |         |           |
| C5L  | 1                 | 0.5/39  | -0.3/-22    | 5.4e-12          | 3.3/200 | 0.3/-100   | 2.9e-04           | 1.7/97  | -0.5/-57  |
| C6L  | 1.4               | 0.5/18  | -0.2/-10    | 8.6e-11          | 2.8/178 | 0.5/-93    | 3.7e-04           | 1.8/48  | -0.3/-25  |
| C7L  | 1.6               | 0.5/2.8 | -0.2/-1.8   | 1.2e-10          | 3.8/90  | 1.4/177    | 4.5e-04           | 1.8/29  | -0.06/12  |
| C8L  | 1.9               | 0.6/1.1 | -0.2/-0.5   | 2.9e-10          | 2.9/7   | -0.4/-0.04 | 5.3e-04           | 1.6/6   | -0.5/-0.9 |
| C9L  | 2.4               | 0.5/1.2 | -0.1/-0.4   | 7.8e-10          | 3.8/6   | 0.7/1.3    | 6.3e-04           | 1.7/7   | -0.2/-0.8 |
| C10L | 2.7               | 0.8/1.4 | -0.2/-0.5   | 1.2e-09          | 3.3/7   | -0.1/-0.3  | 7.1e-04           | 1.7/7   | -0.3/-1.6 |
| C11L | 2.9               | 0.7/1.1 | -0.2/-0.2   | 1.3e-09          | 2.6/6   | 0.1/1      | 7.3e-04           | 1.4/7   | -0.2/-1.2 |
| C12L | 3                 | 0.8/1   | -0.3/-0.2   | 1.3e-09          | 2.4/4.2 | 0.1/0.5    | 7.4e-04           | 1.6/5   | -0.3/-0.1 |
| C13L | 3.3               | 1.6/1.8 | -0.3/-0.4   | 1.1e-09          | 2.1/3.2 | -0.2/0.04  | 7.5e-04           | 1.7/4.3 | -0.6/-0.4 |
| C14L | 3.5               | 1.2/1.4 | 0.04/-0.01  | 1.2e-09          | 2.3/2.2 | 0.4/0.7    | 7.5e-04           | 1.3/3.6 | 0.08/0.03 |
| C15L | 3.6               | 4.5/6   | 0.2/-0.01   | 1.2e-09          | 9/9     | 0.1/0.7    | 7.4e-04           | 4/6     | -0.7/-0.7 |
| C16L | 3.6               | 2.7/4.1 | 0.3/0.00    | 1.1e-09          | 4.7/5   | -0.3/0.04  | 7.1e-04           | 2/4.3   | -0.3/-0.7 |
| U5L  | 3.9               | 3/42    | -1/-13      | 4.9e-07          | 2.3/55  | 0.02/-1.7  | 2.1e-03           | 4.5/57  | -1.3/-22  |
| U6L  | 4.5               | 3.5/24  | -0.5/-7     | 4.6e-07          | 2.2/42  | 0.1/-1.5   | 2.8e-03           | 3/43    | -0.4/-17  |
| U7L  | 4.9               | 4.2/4.9 | -0.6/-1.3   | 5.0e-07          | 2.7/6   | 0.08/0.08  | 3.1e-03           | 3.7/16  | -0.8/-7   |
| U8L  | 5                 | 2.9/3.6 | -0.5/-0.7   | 4.9e-07          | 2.7/3.5 | 0.07/0.1   | 3.3e-03           | 2.9/11  | -0.7/-4.6 |
| U9L  | 5                 | 2.5/3.3 | -0.4/-0.6   | 4.7e-07          | 3.2/5   | 0.05/0.04  | 3.3e-03           | 2.7/9   | -0.6/-3.9 |
| U10L | 5                 | 3.9/4.3 | -0.7/-0.8   | 5.0e-07          | 4.6/6   | 0.04/0.08  | 3.5e-03           | 3.3/9   | -0.8/-3.4 |
| U11L | 5                 | 3.1/3.8 | -0.5/-0.6   | 4.7e-07          | 4.3/5   | 0.08/0.1   | 3.5e-03           | 2.9/6   | -0.6/-2.4 |
| U12L | 4.9               | 3.9/5   | -0.6/-0.7   | 4.7e-07          | 7/7     | 0.05/0.07  | 3.5e-03           | 3.3/7   | -0.7/-2.5 |
| U13L | 4.8               | 4/6     | -0.7/-0.9   | 4.7e-07          | 7/8     | -0.09/-0.1 | 3.4e-03           | 3.8/8   | -0.9/-2.7 |
| U14L | 4.6               | 3.2/4.9 | -0.01/-0.10 | 4.6e-07          | 3.9/4.3 | 0.3/0.2    | 3.4e-03           | 2.6/7   | -0.2/-2   |
| U15L | 4.4               | 4.2/8   | 0.06/-1     | 4.6e-07          | 14/20   | 0.4/0.6    | 3.3e-03           | 3.2/8   | -0.2/-1.9 |
| U16L | 4.3               | 7/17    | 0.3/-2.4    | 4.6e-07          | 11/20   | 0.7/0.7    | 3.2e-03           | 6/28    | -0.3/-9   |
| APIL | 3.4               | 4.4/7   | -1.9/-3.8   | 7.7e-07          | 14/29   | 0.03/0.3   | 0.06              | 3.4/8   | -0.00/1.6 |
| BPIL | 4.3               | 12/27   | -3.4/-5     | 4.8e-07          | 17/25   | 3.2/5      | 0.07              | 8/22    | 3.7/9     |
| CMPL | 6                 | 6/23    | -0.09/-1.2  | 4.0e-08          | 13/49   | 1.7/5      | 0.08              | 7/36    | 1.5/11    |
| LIML | 7                 | 8/12    | -2.6/-6     | 1.3e-06          | 15/21   | 0.6/0.8    | 0.08              | 8/20    | 0.5/-1.6  |

| PVOC | Evaluation target |         |            |                    |         |            |                     |         |           |
|------|-------------------|---------|------------|--------------------|---------|------------|---------------------|---------|-----------|
|      | mean              | rdc     | NMB        | mean               | rdc     | NMB        | mean                | rdc     | NMB       |
| CRNL | 4.5               | 3.8/26  | -1.5/-2.8  | 5.7e-07            | 3.8/46  | -0.06/1.5  | 0.1                 | 1.2/19  | -0.03/3.4 |
|      | OHR-r             |         |            | O <sub>3</sub> R-r |         |            | NO <sub>3</sub> R-r |         |           |
| C5L  | 0.3               | 1.5/102 | -0.6/-62   | 5.4e-12            | 3.3/200 | 0.3/-100   | 2.6e-04             | 1.8/110 | -0.6/-63  |
| C6L  | 0.4               | 1.4/31  | -0.6/-25   | 8.6e-11            | 2.8/178 | 0.5/-93    | 3.3e-04             | 1.9/51  | -0.5/-27  |
| C7L  | 0.5               | 2.4/6   | 0.4/-4.5   | 1.2e-10            | 3.8/90  | 1.4/177    | 4.1e-04             | 1.9/31  | -0.09/11  |
| C8L  | 0.6               | 1.6/2.8 | -1/-1.6    | 2.9e-10            | 2.9/7   | -0.4/-0.04 | 4.8e-04             | 1.6/7   | -0.7/-1   |
| C9L  | 0.8               | 1.9/2.7 | -0.08/-0.3 | 7.8e-10            | 3.8/6   | 0.7/1.3    | 5.7e-04             | 1.8/7   | -0.3/-0.8 |
| C10L | 0.9               | 1.8/2.8 | -0.3/-1.1  | 1.2e-09            | 3.3/7   | -0.1/-0.3  | 6.4e-04             | 1.8/8   | -0.4/-1.9 |
| C11L | 0.9               | 1.1/2.1 | -0.2/-0.05 | 1.3e-09            | 2.6/6   | 0.1/1      | 6.8e-04             | 1.4/7   | -0.3/-1.3 |
| C12L | 1                 | 1.2/1.7 | -0.2/-0.2  | 1.3e-09            | 2.4/4.2 | 0.1/0.5    | 6.8e-04             | 1.5/5   | -0.4/-0.2 |
| C13L | 1                 | 2.1/2.4 | -0.5/-0.6  | 1.1e-09            | 2.1/3.2 | -0.2/0.04  | 6.9e-04             | 1.9/4.5 | -0.7/-0.4 |
| C14L | 1                 | 2.1/1.7 | 0.3/0.1    | 1.2e-09            | 2.3/2.2 | 0.4/0.7    | 6.9e-04             | 1.4/3.8 | 0.09/0.04 |
| C15L | 0.9               | 6/7     | -0.6/0.00  | 1.2e-09            | 9/9     | 0.1/0.7    | 6.8e-04             | 4.3/6   | -0.8/-0.6 |
| C16L | 0.7               | 3.5/4.3 | -0.6/-0.8  | 1.1e-09            | 4.7/5   | -0.3/0.04  | 6.5e-04             | 2.2/4.5 | -0.4/-0.8 |
| U5L  | 2                 | 2.9/42  | -1.3/-18   | 4.8e-09            | 1.2/89  | 0.3/-36    | 1.4e-03             | 4.9/59  | -2/-30    |
| U6L  | 2.3               | 3.3/22  | -0.7/-9    | 1.2e-08            | 2.2/111 | 0.4/-59    | 1.9e-03             | 3.4/45  | -0.7/-22  |
| U7L  | 2.6               | 4.2/5   | -0.8/-1.5  | 1.4e-08            | 2.5/6   | 0.2/0.8    | 2.1e-03             | 4.2/18  | -1.2/-9   |
| U8L  | 2.7               | 2.8/3.7 | -0.6/-0.8  | 1.5e-08            | 2.6/3.1 | 0.2/0.5    | 2.2e-03             | 3.1/12  | -1/-6     |
| U9L  | 2.8               | 2.4/3.5 | -0.5/-0.5  | 9.4e-09            | 3.2/4.8 | 0.1/0.6    | 2.2e-03             | 2.8/10  | -0.9/-5   |
| U10L | 2.7               | 4/4.7   | -0.9/-1    | 8.5e-09            | 4.4/6   | 0.4/1      | 2.3e-03             | 3.6/9   | -1.1/-4.4 |
| U11L | 2.4               | 3.3/4   | -0.8/-0.8  | 1.5e-08            | 3.9/5   | 0.3/0.7    | 2.3e-03             | 3.2/7   | -0.9/-3.3 |
| U12L | 2.2               | 4.1/6   | -1/-1.1    | 1.6e-08            | 6/7     | 0.2/0.4    | 2.2e-03             | 3.7/8   | -1/-3.4   |
| U13L | 2.1               | 4.1/6   | -1.3/-1.4  | 1.6e-08            | 6/8     | -0.1/0.02  | 2.1e-03             | 4/9     | -1.2/-3.7 |
| U14L | 1.9               | 3.2/4.7 | -0.2/-0.2  | 1.4e-08            | 3.7/4.3 | 0.03/0.2   | 2.0e-03             | 2.8/7   | -0.4/-2.9 |
| U15L | 1.8               | 4.4/8   | -0.4/-1.7  | 1.3e-08            | 14/20   | 0.5/-0.2   | 1.9e-03             | 3.3/9   | -0.5/-2.7 |
| U16L | 1.7               | 7/17    | -0.10/-4.5 | 1.2e-08            | 11/21   | 0.6/-2.6   | 1.8e-03             | 6/29    | -0.7/-12  |
| APIL | 2.7               | 5/7     | -2.3/-3.4  | 2.1e-08            | 14/30   | -0.3/-7    | 7.7e-03             | 3.7/15  | -0.5/3.4  |
| BPIL | 1.9               | 11/22   | -3.9/-7    | 2.5e-10            | 21/30   | 15/19      | 0.01                | 9/30    | 5/11      |
| CMPL | 1.3               | 5/25    | 0.8/-8     | 3.9e-10            | 16/57   | 6/-11      | 0.02                | 8/42    | 1.8/21    |
| LIML | 5                 | 10/14   | -3.1/-6    | 4.0e-07            | 15/22   | 1/6        | 0.03                | 9/21    | 0.7/-3    |
| CRNL | 3.3               | 4.2/19  | -2/0.9     | 2.6e-08            | 4.4/46  | -1.7/-1.1  | 9.6e-03             | 1.4/27  | -0.5/18   |
|      | NO <sub>x</sub>   |         |            | O <sub>3</sub>     |         |            | HO <sub>2</sub>     |         |           |
| C5L  | 10                | 3.2/21  | 0.3/18     | 38                 | 1.3/29  | -0.8/-17   | 2.2e-03             | 2/62    | -1.3/-31  |

| PVOC | Evaluation target |         |           |      |         |           |         |         |           |
|------|-------------------|---------|-----------|------|---------|-----------|---------|---------|-----------|
|      | mean              | rdc     | NMB       | mean | rdc     | NMB       | mean    | rdc     | NMB       |
| C6L  | 10                | 4.6/8   | -0.8/6    | 39   | 2/14    | -1/-10    | 2.2e-03 | 1.6/38  | -1/-20    |
| C7L  | 10                | 7/8     | -1.7/-1.9 | 39   | 3/4.5   | -0.7/-1.2 | 2.3e-03 | 1.5/12  | -0.4/-7   |
| C8L  | 10                | 9/9     | 2.3/1.2   | 40   | 4.1/4.5 | -2.3/-2.8 | 2.3e-03 | 1.2/3.2 | -0.9/-2.1 |
| C9L  | 10                | 7/8     | -1.3/-1.8 | 41   | 2.6/4   | -0.7/-1.4 | 2.4e-03 | 1.4/3.8 | -0.5/-1.7 |
| C10L | 10                | 9/8     | -2.8/-0.6 | 40   | 4/3.1   | -0.3/-2.1 | 2.4e-03 | 1.5/3.7 | -0.7/-2.1 |
| C11L | 10                | 8/7     | -1.9/-1.2 | 39   | 3.1/3   | -0.5/-1.4 | 2.3e-03 | 1.4/3.3 | -0.8/-1.8 |
| C12L | 10                | 7/8     | -0.1/-0.8 | 38   | 2/2.7   | -1.1/-1.5 | 2.2e-03 | 1.5/3.2 | -0.9/-1.8 |
| C13L | 10                | 4.7/5   | -0.2/-0.8 | 38   | 1.6/2.5 | -1/-1.3   | 2.2e-03 | 1.4/3.2 | -0.9/-1.9 |
| C14L | 11                | 8/6     | -3/-1.6   | 36   | 3.7/2.9 | 0.4/-0.6  | 2.1e-03 | 1.4/2.9 | -0.4/-1.5 |
| C15L | 10                | 3/2.9   | -0.5/-0.8 | 35   | 2/2.9   | -0.7/-1.1 | 2.1e-03 | 1.4/3.1 | -0.7/-1.5 |
| C16L | 10                | 4.1/4.7 | 0.6/0.9   | 34   | 1.8/3.1 | -1/-1.7   | 1.9e-03 | 1.4/2.9 | -0.6/-1.5 |
| U5L  | 7                 | 1.5/11  | 0.02/4.8  | 42   | 1.5/16  | -1/-9     | 3.9e-03 | 4.2/44  | -2/-13    |
| U6L  | 7                 | 6/6     | -1/3      | 44   | 3.4/13  | -2.3/-9   | 3.8e-03 | 4.1/27  | -2.1/-12  |
| U7L  | 7                 | 7/7     | -1.1/-0.7 | 45   | 3.7/4   | -2.4/-2.9 | 3.8e-03 | 4.2/7   | -2.3/-2.5 |
| U8L  | 7                 | 7/7     | -1/-1     | 46   | 3.5/3.8 | -2.3/-2.7 | 3.8e-03 | 3.5/4.8 | -2.1/-2.5 |
| U9L  | 7                 | 8/8     | -1/-1.1   | 45   | 3.6/4.1 | -2.3/-2.8 | 3.7e-03 | 3.5/5   | -2.1/-2.7 |
| U10L | 7                 | 8/8     | -0.8/-0.9 | 44   | 3.6/4   | -2.3/-2.7 | 3.5e-03 | 3.6/5   | -2.2/-3   |
| U11L | 7                 | 8/8     | -0.7/-0.8 | 42   | 3.2/3.7 | -2/-2.4   | 3.3e-03 | 3.4/5   | -1.9/-2.8 |
| U12L | 7                 | 7/7     | -0.5/-0.6 | 41   | 2.9/3.5 | -1.8/-2.3 | 3.1e-03 | 3.4/6   | -1.9/-2.8 |
| U13L | 7                 | 6/6     | -0.4/-0.4 | 39   | 2.6/3.2 | -1.6/-2   | 2.9e-03 | 3.5/6   | -1.8/-2.8 |
| U14L | 7                 | 4.9/4.8 | -0.5/-0.4 | 37   | 2/2.6   | -1.2/-1.6 | 2.7e-03 | 2.7/5   | -1.3/-2.3 |
| U15L | 7                 | 3/3.7   | -0.4/0.2  | 36   | 1.7/3.9 | -1/-2.5   | 2.6e-03 | 2.4/11  | -1.2/-6   |
| U16L | 7                 | 1.8/1.2 | -0.4/0.2  | 34   | 1.7/4.3 | -1/-2.8   | 2.5e-03 | 2.3/15  | -0.9/-6   |
| APIL | 5                 | 9/13    | -1.4/1    | 47   | 4.9/8   | -3.5/-6   | 3.3e-03 | 13/17   | -9/-12    |
| BPIL | 6                 | 10/19   | 5/11      | 43   | 9/18    | -7/-11    | 2.9e-03 | 36/53   | -26/-34   |
| CMPL | 7                 | 10/22   | 2.7/7     | 41   | 6/15    | -4.2/-8   | 2.1e-03 | 26/60   | -15/-28   |
| LIML | 5                 | 9/12    | -0.2/0.4  | 51   | 5/7     | -3.9/-5   | 4.8e-03 | 17/22   | -14/-18   |
| CRNL | 6                 | 7/24    | -0.6/10   | 48   | 3.2/19  | -2.3/-12  | 3.4e-03 | 9/38    | -5/-24    |

### S2.3 Additional NMB distributions for evaluation metrics

Additional distributions of mean values and NMB are presented for metrics used to evaluate the preservation of SOA formation and gas-phase reactivity in TBR mechanisms. These figures complement the discussion in Sect. 5 of the main paper and provide extended results across a broader range of metrics and simulation scenarios.

Additional size reduction versus reduction error relationships for tSOA, corresponding to Fig. 7 in the main paper, are shown in Fig. S17 for nine simulation scenarios. These scenarios include continental, polluted continental, remote continental, simplified, urban, and diurnal conditions. As in the main paper, mechanisms C5–C7 and U5 are excluded from the discussion due to their negligible contribution to SOA formation.

In addition to Fig. 8 in the main paper, Fig. S18 presents aerosol elemental ratios and selected functional group distributions for all three VOC classes. Elemental ratios OM:OC and H:C are shown together with functional groups that contribute significantly to aerosol composition, specifically >CO and -OH.

Additional gas-phase evaluation metrics are shown in Fig. S19, including bulk reactivities of reducible species (OHR-r, O<sub>3</sub>R-r, and NO<sub>3</sub>R-r) and concentrations of key oxidants and radicals (NO<sub>x</sub>, O<sub>3</sub>, NO<sub>3</sub>, HO<sub>2</sub>, OH, and RO<sub>2</sub>).

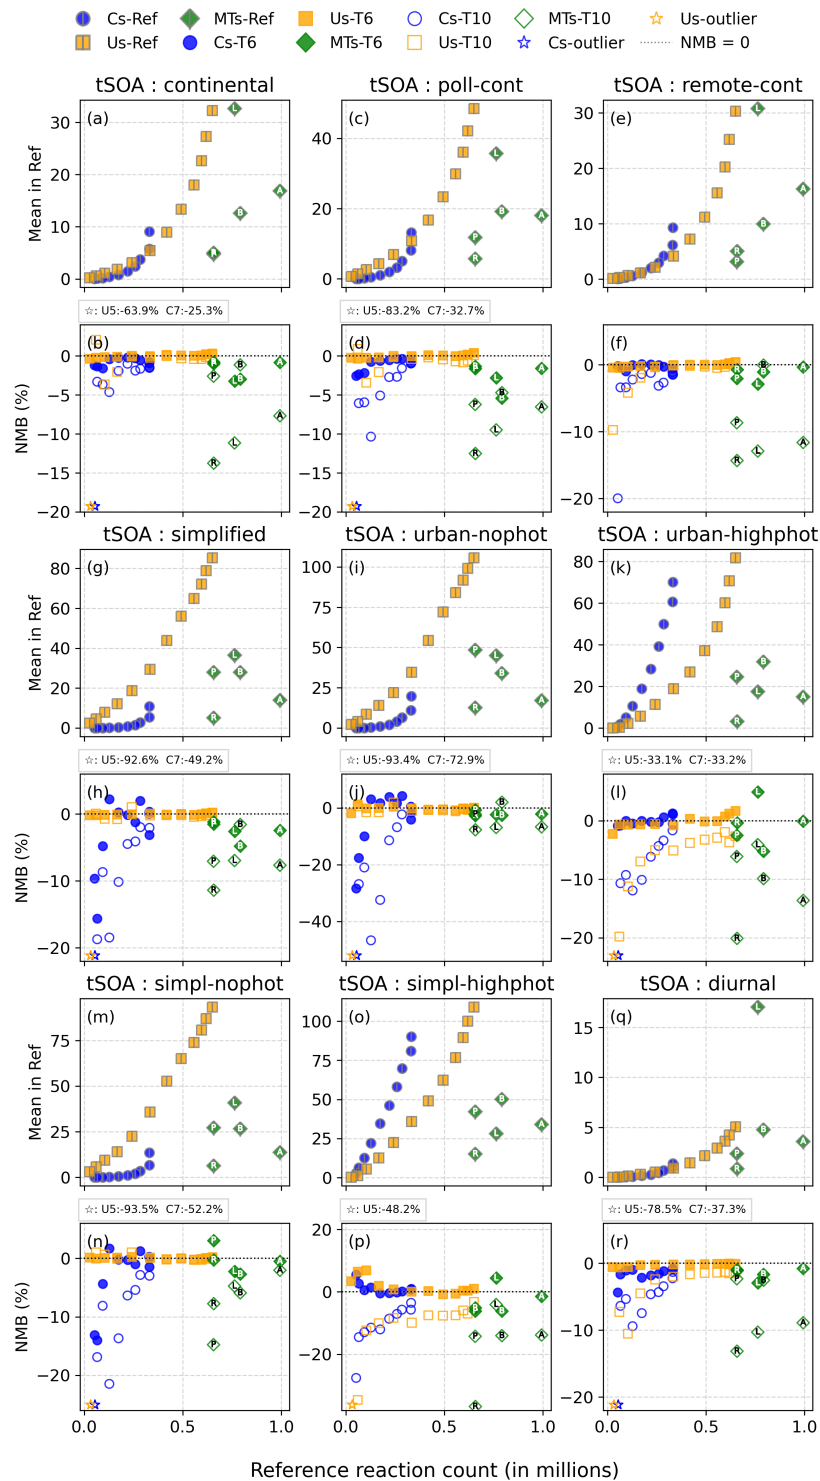

**Figure S17.** TBR-induced deviations in tSOA for additional evaluation scenarios beyond those shown in Fig. 7; symbols and notation are consistent.

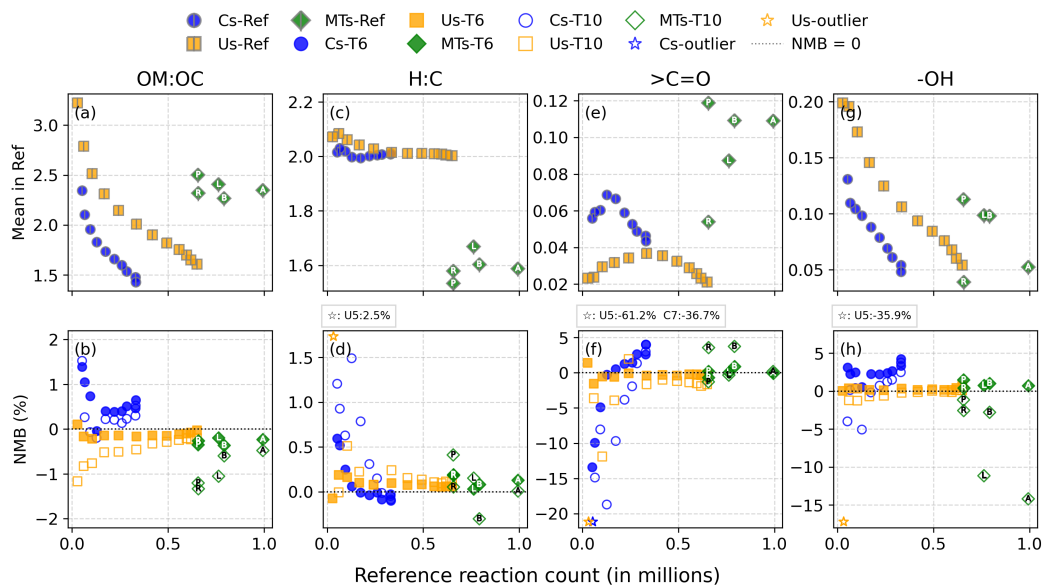

**Figure S18.** TBR-induced deviations in selected elemental SOA ratios and carbon-normalized functional group fractions beyond those shown in Fig. 8, including OM:OC and H:C ratio, ketone (>CO) and alcohol (-OH) functional groups across all VOC classes. Symbols and notation are consistent with Fig. 7.

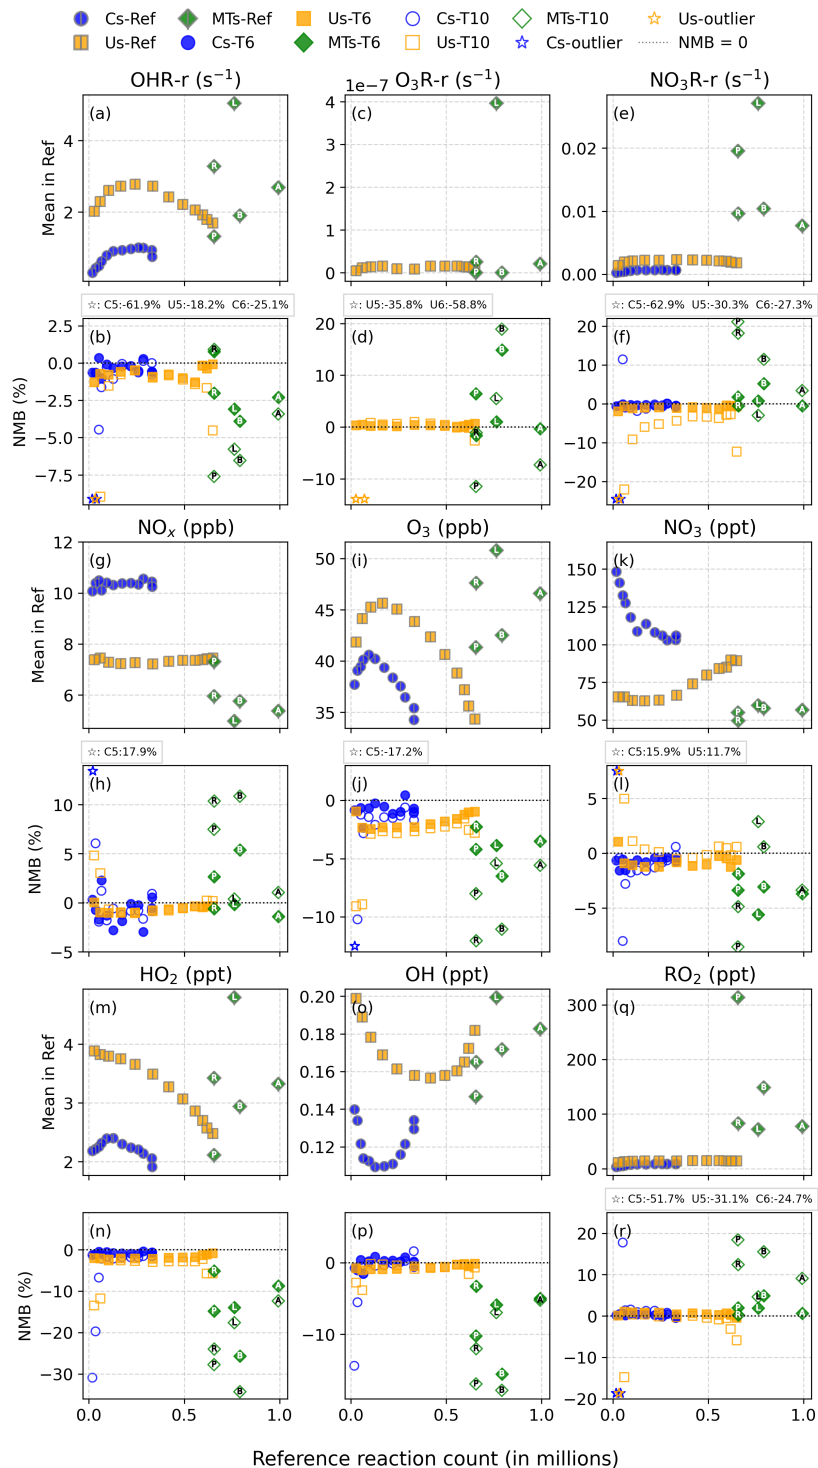

**Figure S19.** TBR-induced deviations in selected elemental SOA ratios and carbon-normalized functional group fractions beyond those shown in Fig. 10, including OHR-r, O<sub>3</sub>R-r, NO<sub>3</sub>R-r, NO<sub>x</sub>, O<sub>3</sub>, NO<sub>3</sub>, HO<sub>2</sub>, OH, and RO<sub>2</sub>. Symbols and notation are consistent with Fig. 7.

## S3 Additional SBR results

### S3.1 Additional stage settings and U8A3d reduction trajectory

As a continuation of Sect. 4.4.2, additional SBR treatments not described in the main paper are summarized here. In early stages (A1 and B1), treatments are configured for efficient reduction of large mechanisms:

- species are grouped and ranked using predefined rules (Sect. 4.2) to identify reduction candidates;
- only base reduction candidates are considered (variant candidate generation is disabled);
- each reduction cycle stops under the current error tolerance when fewer than five valid candidates remain, after which the procedure proceeds to the next tolerance setting or stage, if applicable.

This cutoff of five candidates is an empirical threshold used to avoid restarting SBR cycles under strict error tolerances, where additional cycles are computationally expensive and typically yield only limited or no further reduction.

In later stages (A2, A3, and B2), as the mechanism size decreases, treatments are adjusted to explore additional reduction candidates:

- species grouping is performed per species, and species are ranked using the GENOA v2 method based on removal importance (species inducing larger errors are evaluated later);
- variant candidates are enabled to test combinations of reduction options for each targeted species;
- reduction cycles proceed under each tolerance setting until no valid candidates remain.

#### S3.1.1 Elementary-like treatment

The elementary-like treatment is applied during Stages A3 and B2 to expose additional reduction candidates. It is conceptually opposite to reaction merging. In this treatment, reactions producing multiple reducible products are temporarily separated into reactions with a single reducible product, and reduction is performed on this modified reaction list. This increases the number of reactions but preserves the overall chemical budget and expands the set of candidates for removal. When removal of merged reactions does not satisfy the error tolerance settings, individual product channels enabled by this treatment may be removed if they contribute negligibly to the target quantities.

For example, in reaction R1 with rate constant  $k$ , species VOC-1 reacts with OH to form RO2-1 and RO2-2:

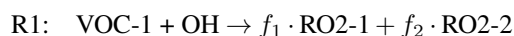

After applying the elementary-like treatment, it is separated into two reactions (R'1 and R'2):

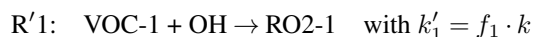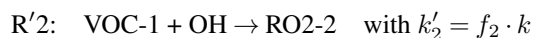

This treatment is applied after all candidates under the same error settings are explored. It allows independent removal of product channels and may introduce additional reductions under the same tolerances. At the end of the cycle, reactions are merged to restore a compact mechanism (deactivating the elementary-like treatment).

### S3.1.2 U8A3d reduction trajectory

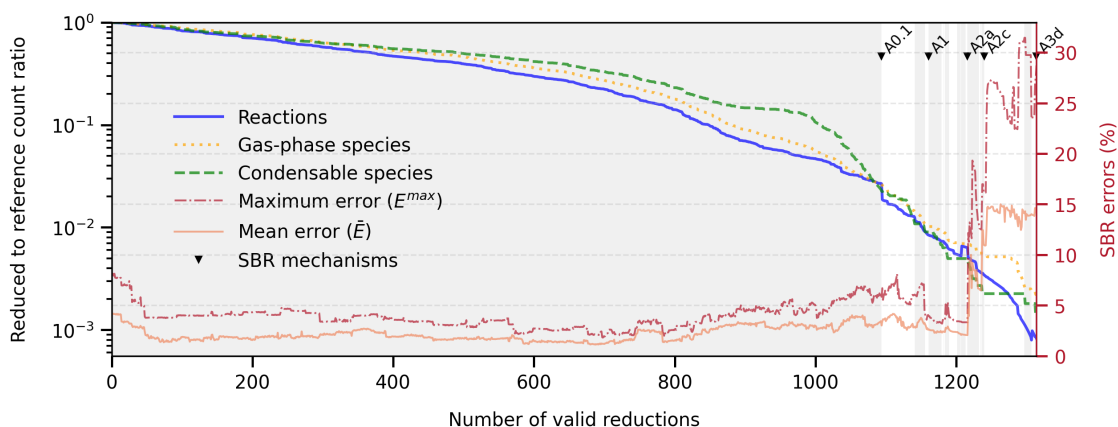

**Figure S20.** Reduction trajectory from U8StP to U8A3d as a function of the number of valid reduction steps. The evolution of the numbers of reactions, gas-phase species, and condensable species is shown together with the corresponding maximum and mean errors across evaluation scenarios. Gray and white intervals denote successive reduction cycles.

Figure S20 is included as an example to illustrate the evolution of mechanism size and errors during SBR for U8 reduction. The trajectory spans from the starting-point mechanism (StP) to the final reduced mechanism A3d. Representative mechanisms from Table 4 generated along this trajectory are marked, including A0.1, A1, A2a, A2c, and A3d.

Most valid reduction steps (1094 out of 1314) occur during the first reduction cycle in Stage A1. During this stage, all mechanism size metrics decrease steadily. Error levels initially decrease slightly relative to StP, then remain stable, followed by a gradual increase toward the end of the cycle under relatively strict error tolerances. This results in smooth and continuous changes in both mechanism size and accuracy, consistent with early-stage reduction, where many candidates are available and their influence on the evaluation targets is limited.

As the reduction proceeds, the number of valid reduction steps decreases as the mechanism becomes smaller and approaches the error tolerances. The cumulative numbers of accepted reductions reach 1161 at the end of Stage A1, and 1216, 1240, and 1314 for mechanisms A2a, A2c, and A3d, respectively. The decrease in condensable species is more pronounced than that of gas-phase species between A2a and A2c, consistent with the application of the elementary-like treatment.

In later stages (A2–A3), reduction continues under relaxed constraints with additional candidate exploration. This leads to faster decreases in relative mechanism size, accompanied by increased variability in errors. Occasional increases in error

occur when more aggressive reductions are accepted under looser tolerance settings, and small structural changes can induce relatively large error variations. These late-stage reductions exhibit clearer trade-offs between mechanism size and error.

### S3.2 NMB distribution and time variation preservation

The U8 reduction is used as an illustrative example in the main paper to demonstrate SBR performance, with preservation of key SOA-related and gas-phase metrics evaluated in Sect. 6.2 and time-variation behavior examined in Sect. 6.3. To extend this analysis and assess the robustness of SBR across different VOC classes, corresponding results for C12 and LIM reductions are presented here. These include NMB distributions of key metrics (Figs. S21–S22) and time series of tSOA and OHR-r (Figs. S23–S24). All figures follow the same format, symbols, and notation as those used for U8 to facilitate direct comparison. In addition, scenario-specific time variations for U8 that are not shown in Fig. 14 are provided in Fig. S25.

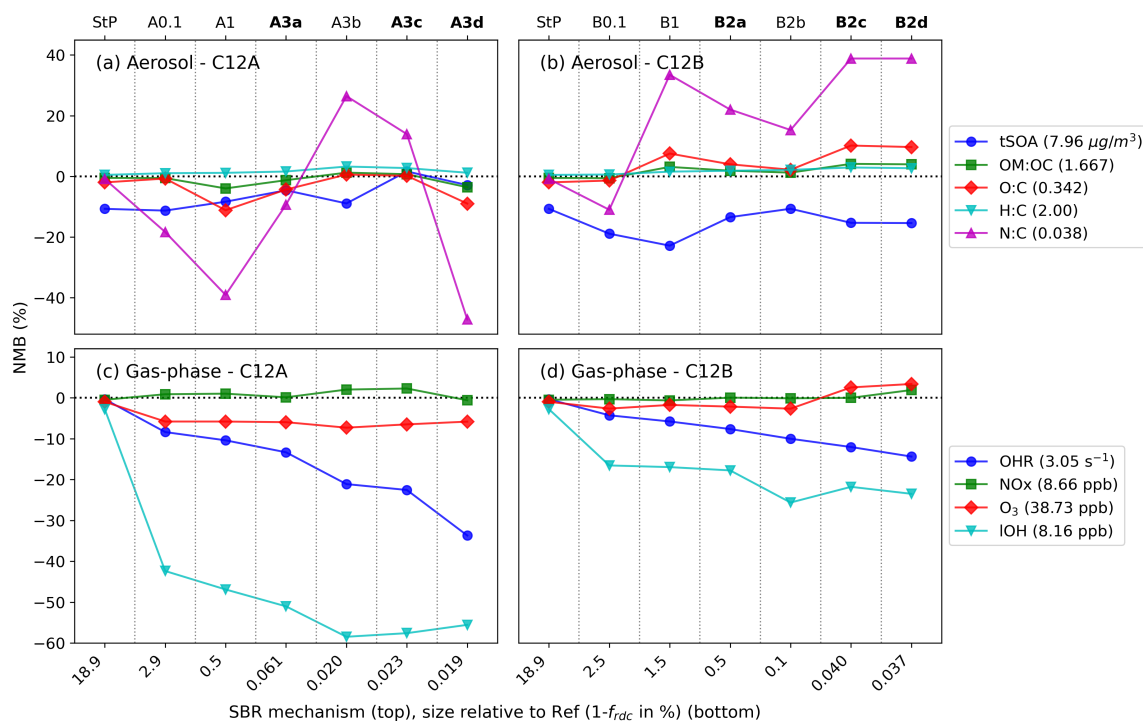

**Figure S21.** NMB distributions of key SOA-related and gas-phase metrics simulated with C12 reduced mechanisms. Symbols and notation are consistent with Fig. 12.

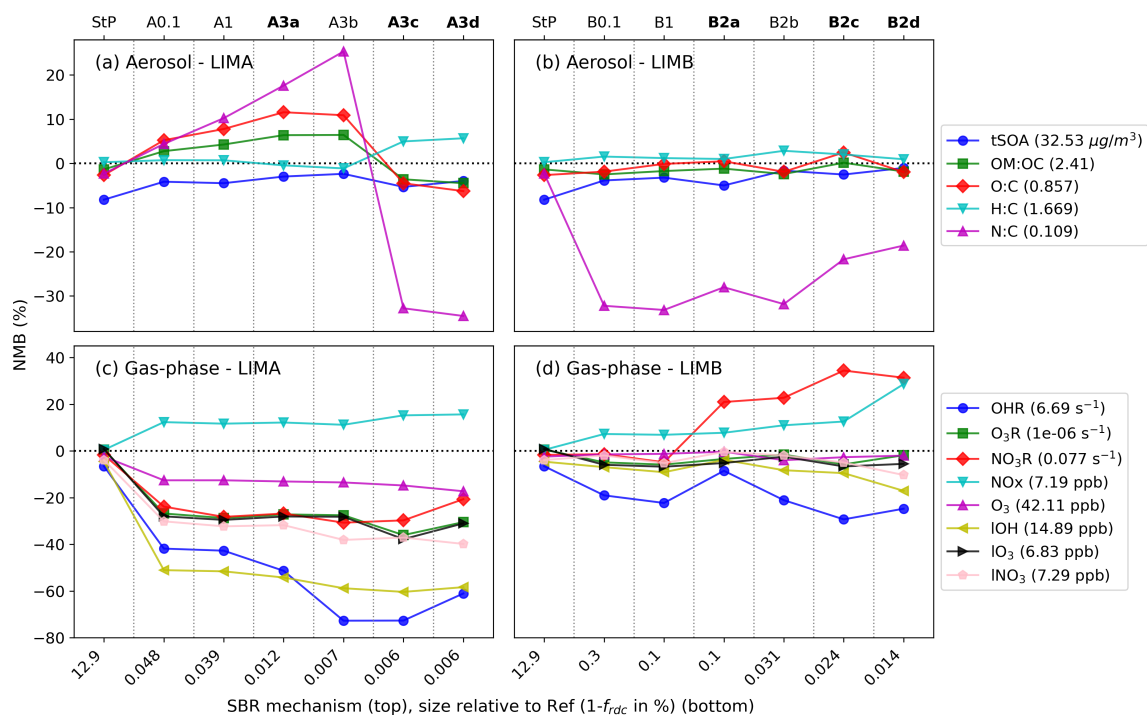

**Figure S22.** NMB distributions of key SOA-related and gas-phase metrics simulated with LIM reduced mechanisms. Symbols and notation are consistent with Fig. 12.

### S3.2.1 Scenario-dependent chemical behavior (U8 example)

The chemistry-driven differences across scenarios of the U8 reduction (Fig. 14) summarized in Sect. 6.3 are expanded here with quantitative detail and process-level interpretation.

In high- $\text{NO}_x$  regimes such as the urban scenario (Fig. 14(c)), elevated and fixed  $\text{NO}_x$  and  $\text{O}_3$  concentrations produce rapid nighttime oxidation, resulting in fast increases in both tSOA and OHR-r. By 8 h, tSOA reaches approximately  $13.5 \mu\text{g m}^{-3}$  and OHR-r reaches about  $3.0 \text{ s}^{-1}$ . In contrast, the remote scenario (Fig. 14(e)), characterized by extremely low  $\text{NO}_x$  (0.01 ppb), exhibits weak nighttime oxidation, with tSOA remaining below  $0.2 \mu\text{g m}^{-3}$  during the same period, while OHR-r increases more gradually to  $2.1 \text{ s}^{-1}$ . Following sunrise, enhanced OH production accelerates daytime oxidation, with  $\text{RO}_2$  chemistry shifting toward  $\text{HO}_2$ -dominated pathways and peroxide formation, leading to increases in tSOA to  $1.2 \mu\text{g m}^{-3}$  and OHR-r to  $4.2 \text{ s}^{-1}$  by 16 h. For scenarios with diurnally varying photolysis, diurnal variability is explicitly reflected in the time series. As simulations are initialized under winter conditions (January 1), daylight periods are short (gray shaded regions), limiting photolysis-driven daytime oxidation and leaving nighttime chemistry dominant for much of the simulation.

Conversely, under fixed photolysis conditions, scenarios such as urban-nophot, urban-highphot, simpl-nophot, and simpl-highphot prescribe constant photolysis settings and rely on specified  $\text{O}_3$  and  $\text{NO}_x$  levels. Under these scenarios, both tSOA and OHR-r evolve smoothly, with generally rapid increases during the initial oxidation period followed by slower temporal changes. For the U8 mechanism under the simpl-nophot scenario shown in Fig. 14(k), tSOA reaches  $16.6 \mu\text{g m}^{-3}$  by the end of the simulation, while OHR-r peaks  $4.0 \text{ s}^{-1}$  at 40 h before decreasing slightly to  $3.4 \text{ s}^{-1}$ , reflecting gradual shifts in dominant reaction pathways during multi-generation oxidation.

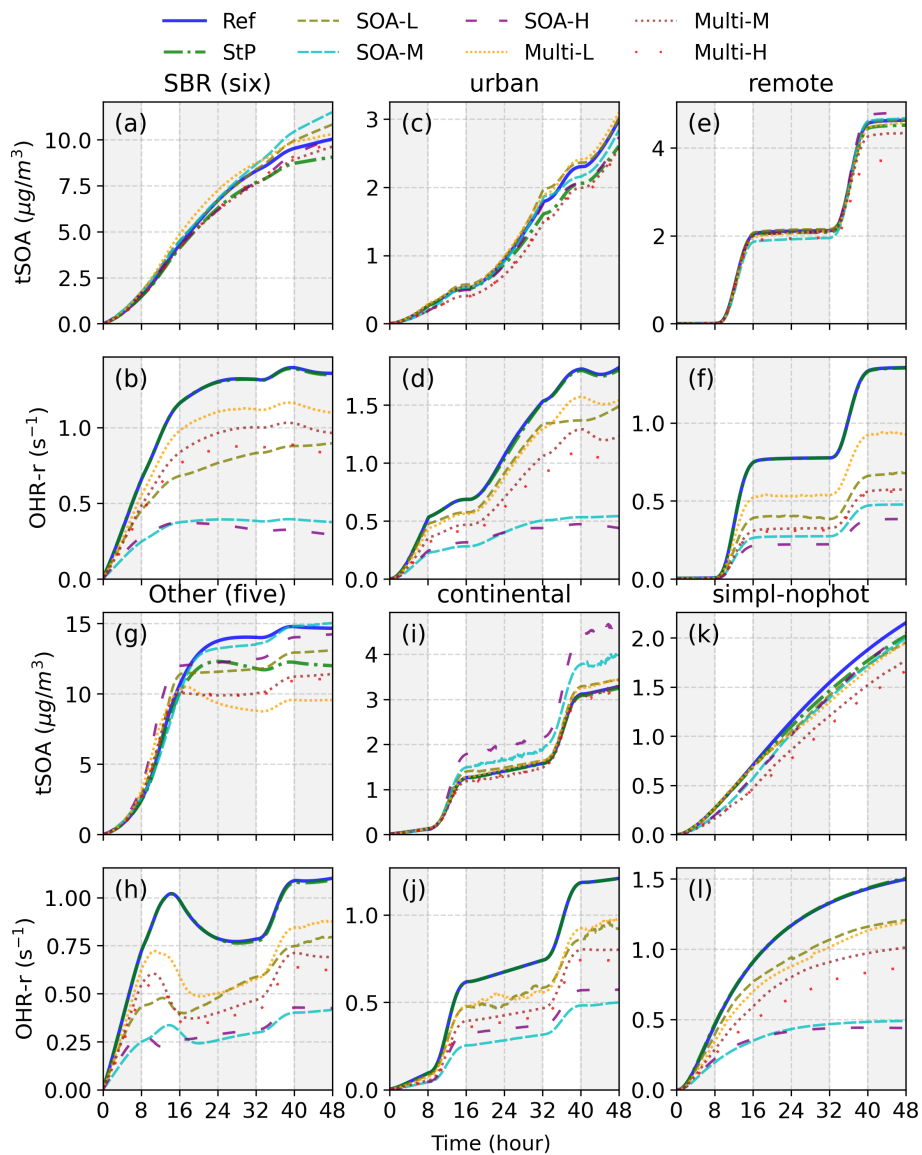

**Figure S23.** Time evolution of tSOA and OHR-r simulated with C12 mechanisms for the same set of scenarios in Fig. 14; Symbols and notation are consistent.

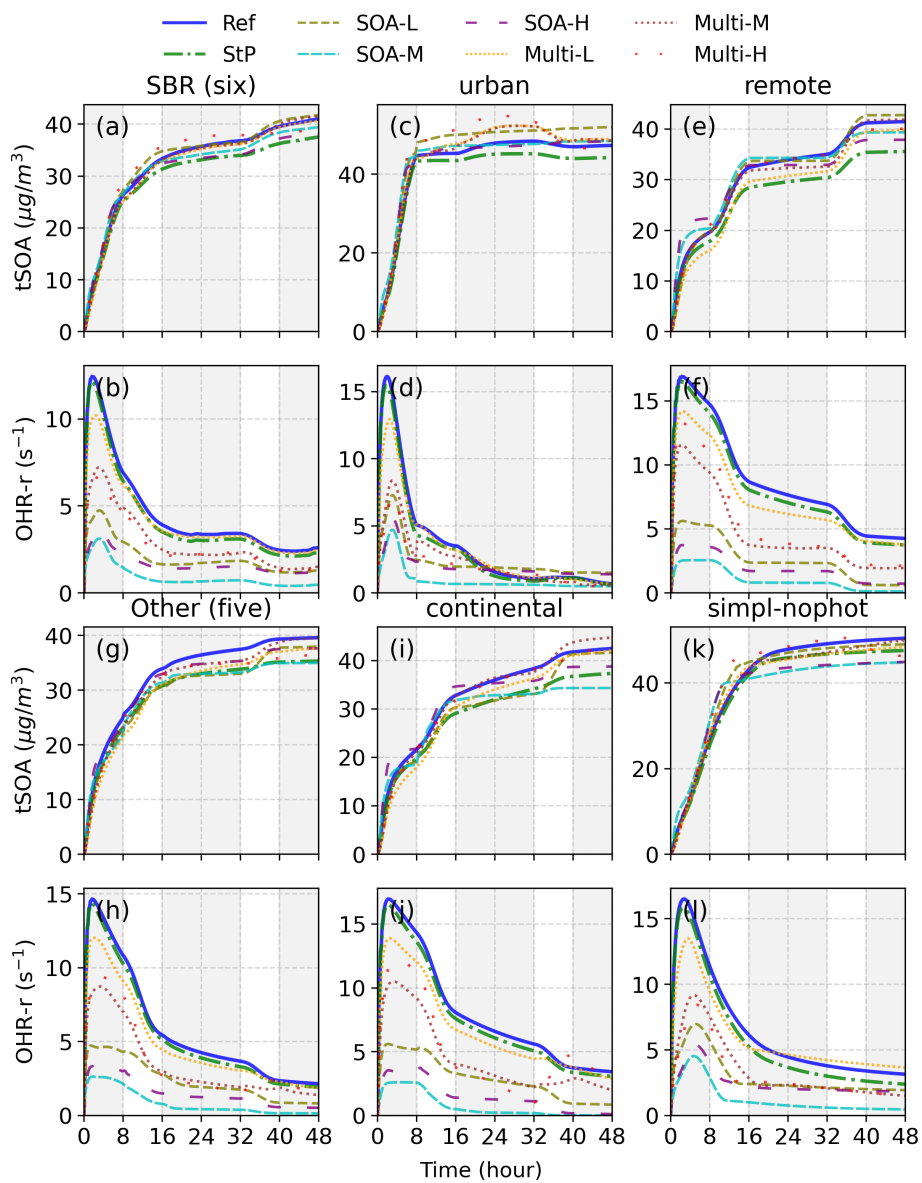

**Figure S24.** Time evolution of tSOA and OHR-r simulated with LIM reduced mechanisms for the same set of scenarios shown in Fig. 14, with symbols and notation consistent.

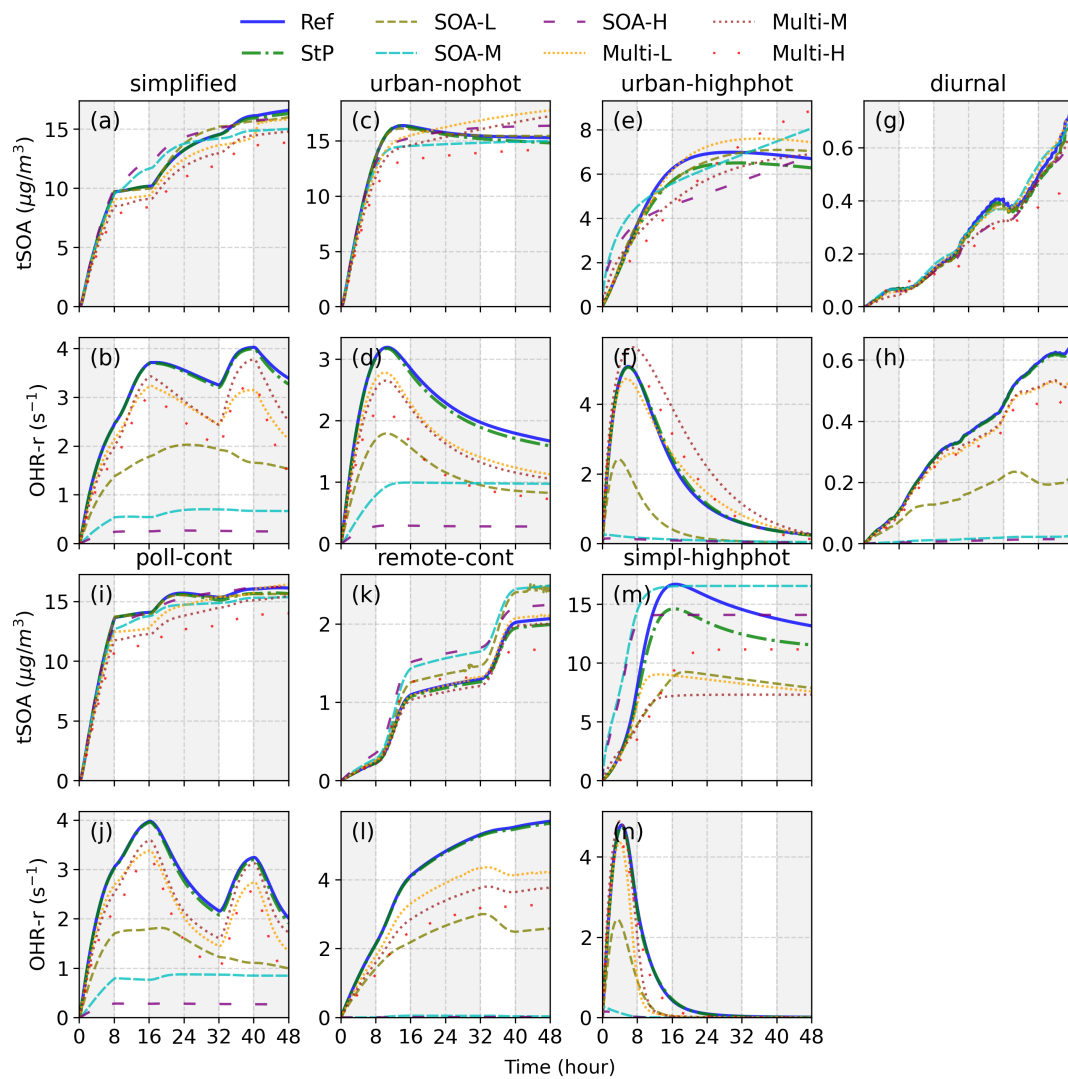

**Figure S25.** Time evolution of tSOA and OHR-r simulated with U8 reduced mechanisms for evaluation scenarios not included in Fig. 14.

### S3.3 Reaction pathway visualization for SBR mechanisms

Reaction pathways (Figs. S26–S31) are presented for the final reduced SBR mechanisms derived from the C12 and LIM reference mechanisms, using the same tolerance settings as the U8 SBR mechanism discussed in Sect. 6.4. These comparisons illustrate how differences in chemical complexity across mechanisms influence the resulting reduced mechanism structure and retained reaction pathways.

In all reaction graphs presented, the same legends as in Fig.15 are applied, consistent with those used in the main paper. Species are represented as nodes labeled by chemical name and molecular structure. PVOCs, basic non-reducible species, and other reducible species are indicated by red, blue, and black text, respectively. Reducible condensable species are shown as boxes, with SVOCs ( $P_{\text{sat}} > 10^{-9}$  atm at 298 K) in light gray and lower-volatility species in black. Reactions are shown as edges with colors and symbols indicating reaction types: OH oxidation (red line with open diamond),  $\text{O}_3$  oxidation (blue filled V-shaped arrow),  $\text{NO}_3$  oxidation (green open triangle), reactions with  $\text{HO}_2$  (cyan open circle), reactions with NO (orange filled circle),  $\text{RO}_2$  reactions (gray filled diamond), unimolecular reactions (“uni”, black filled tee), photolysis reactions (“ $h\nu$ ”, brown open square), and isomerization reactions (“isom”, darkcyan inverted triangle). Terminal species (i.e., species that do not lead to the formation of other reducible species) that undergo further atmospheric processing not explicitly shown are connected to a gray dot.

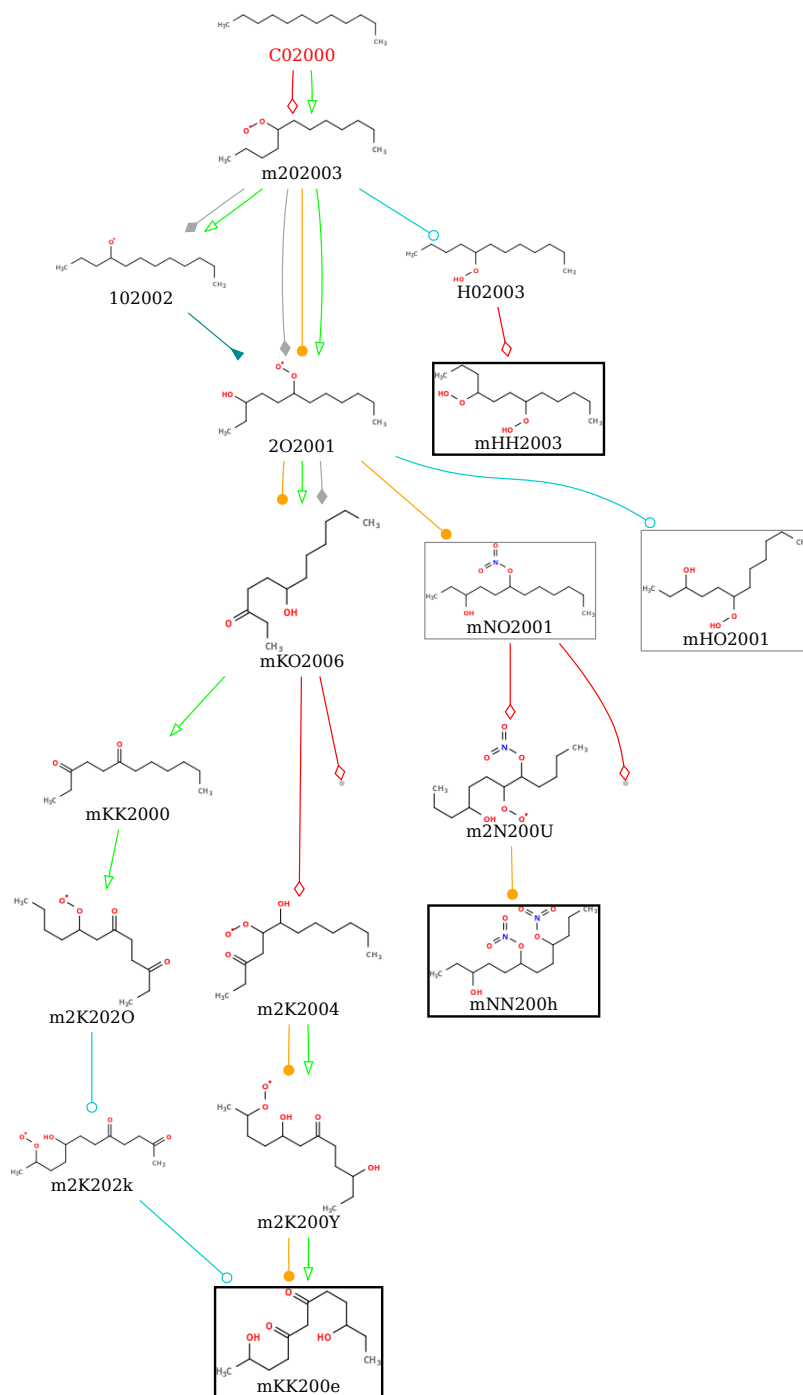

**Figure S26.** Reaction pathways of C12SOA-H (C12A3d) mechanism.

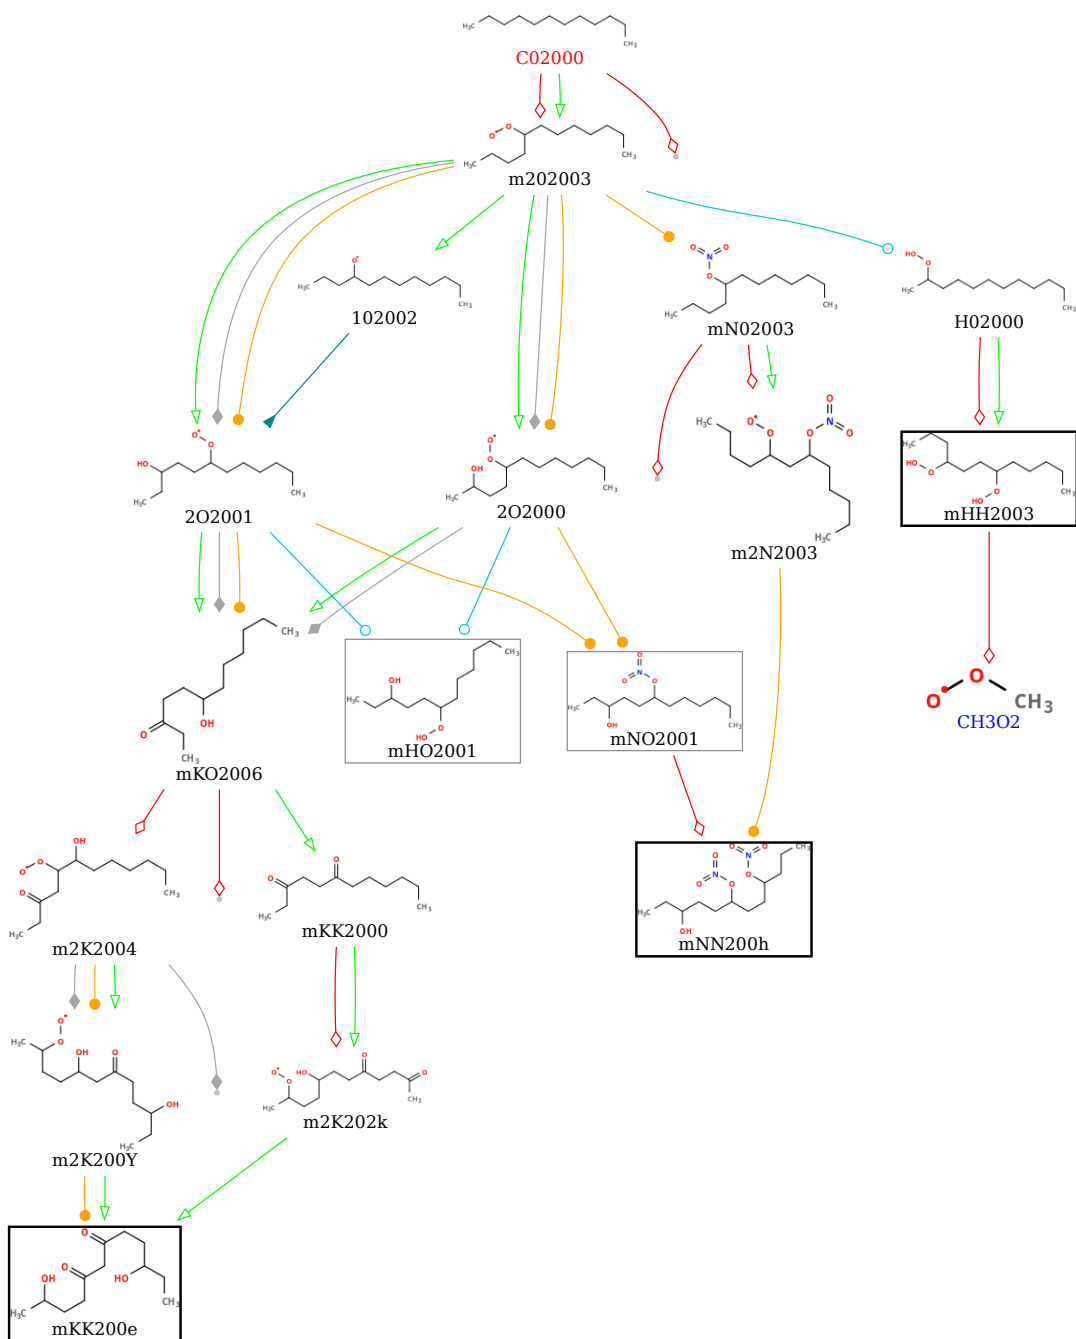

**Figure S27.** Reaction pathways of C12SOA-M (C12A3c) mechanism.

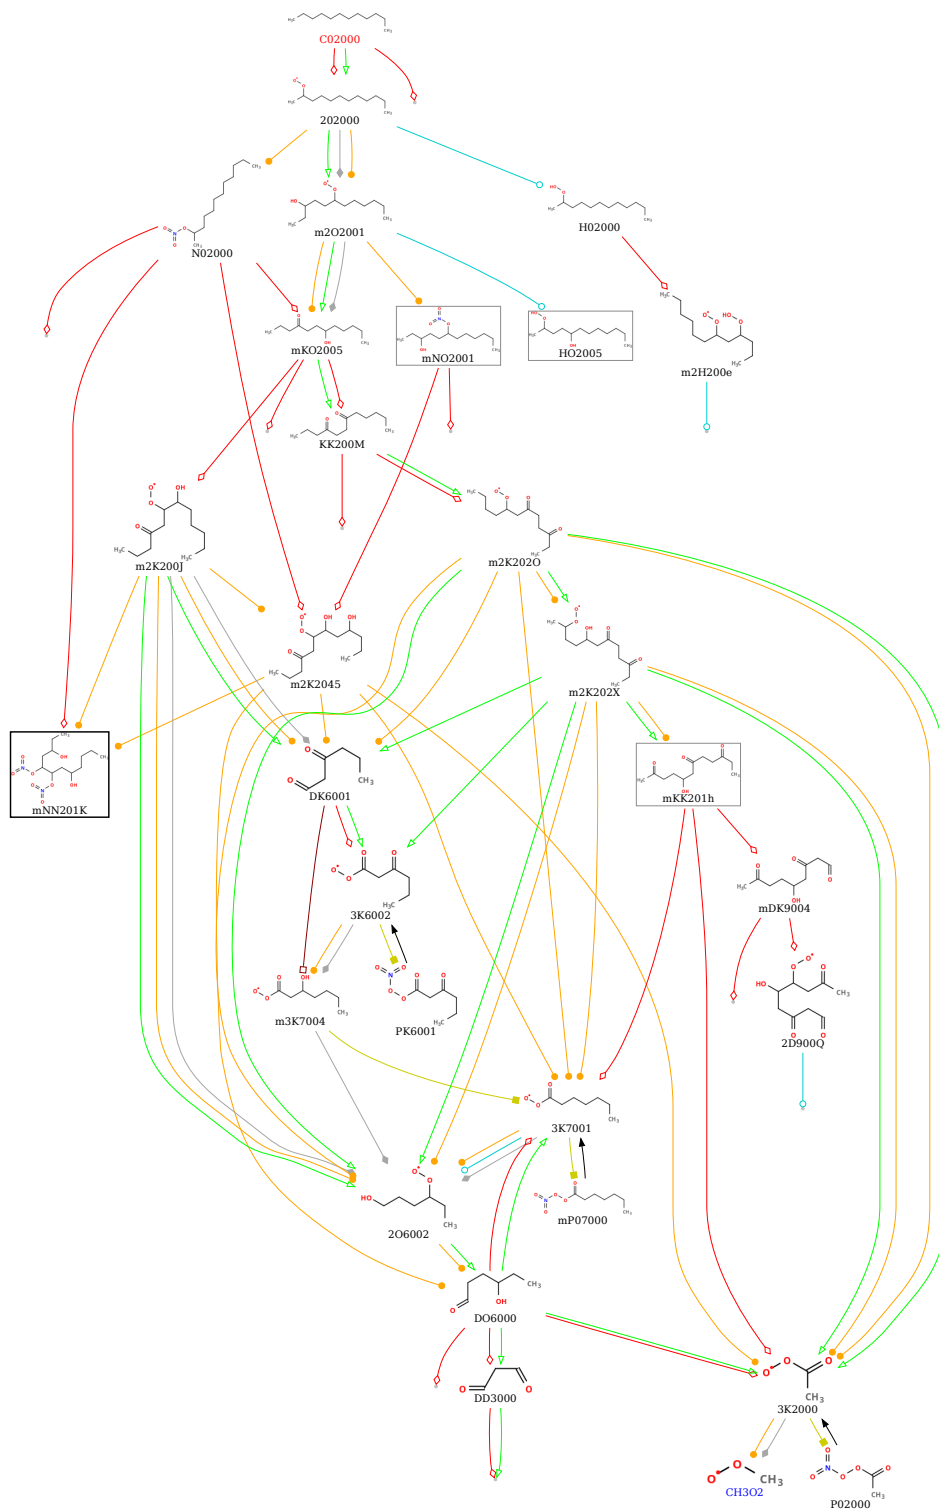

**Figure S28.** Reaction pathways of C12Multi-H (C12B2d) mechanism.

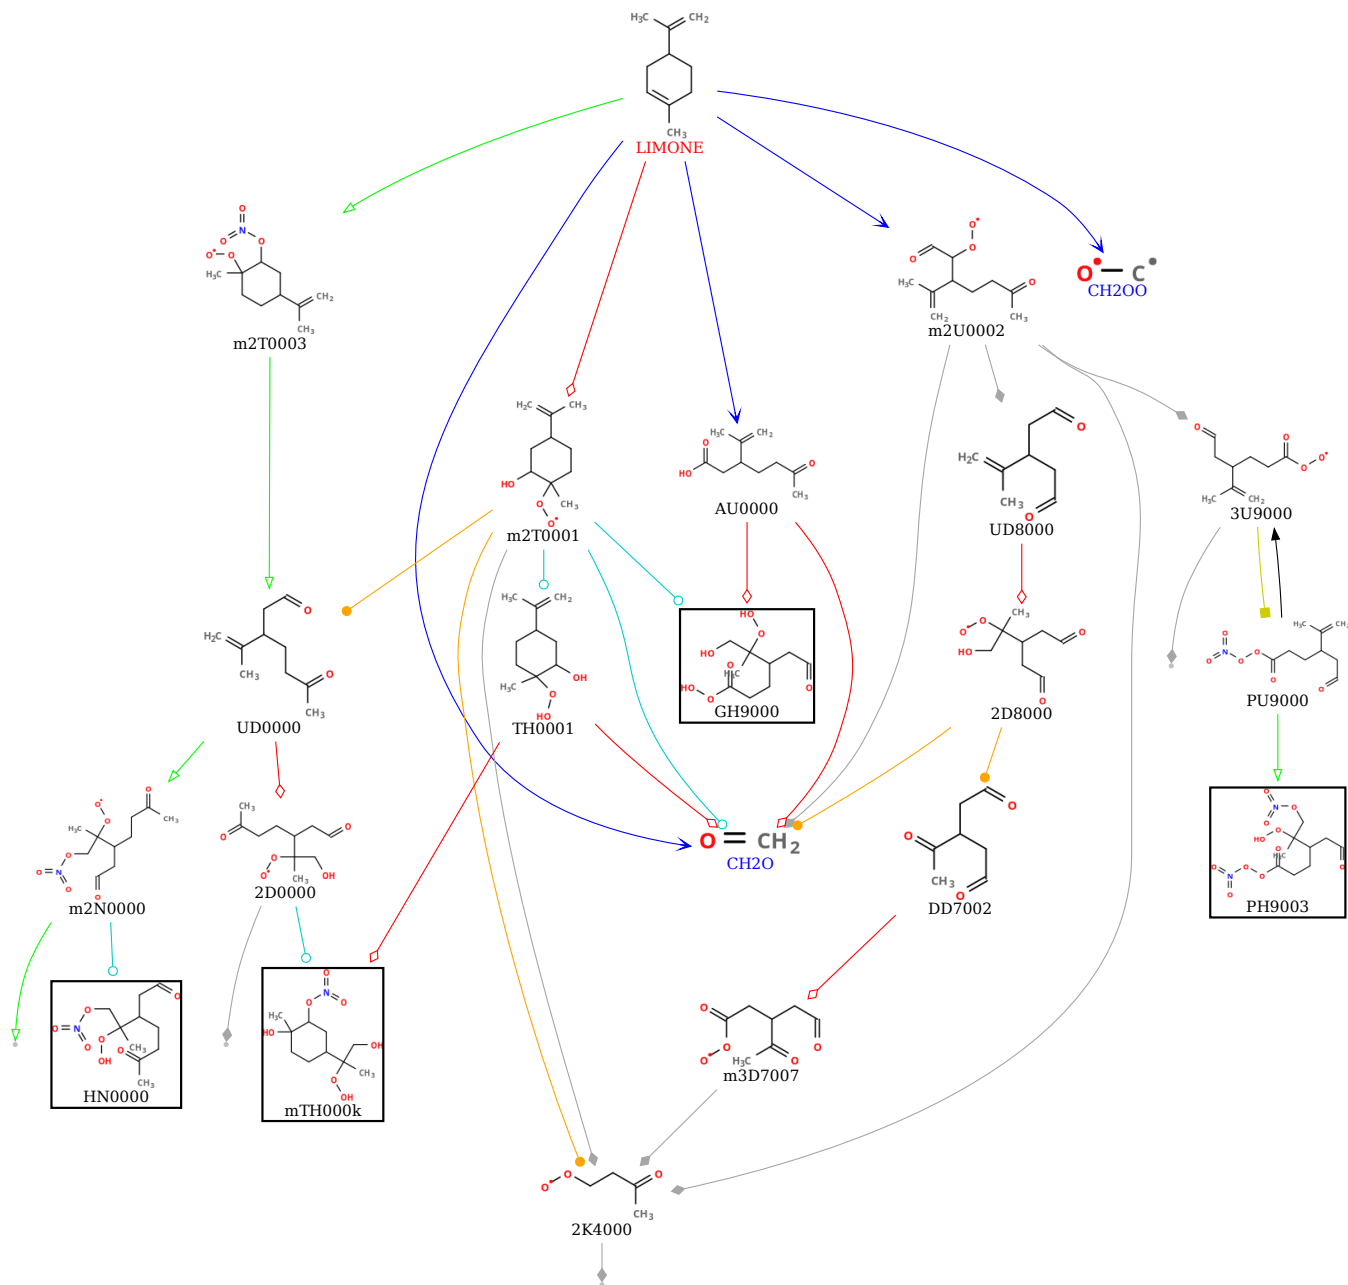

**Figure S29.** Reaction pathways of LIMSOA-H (LIMA3d) mechanism.

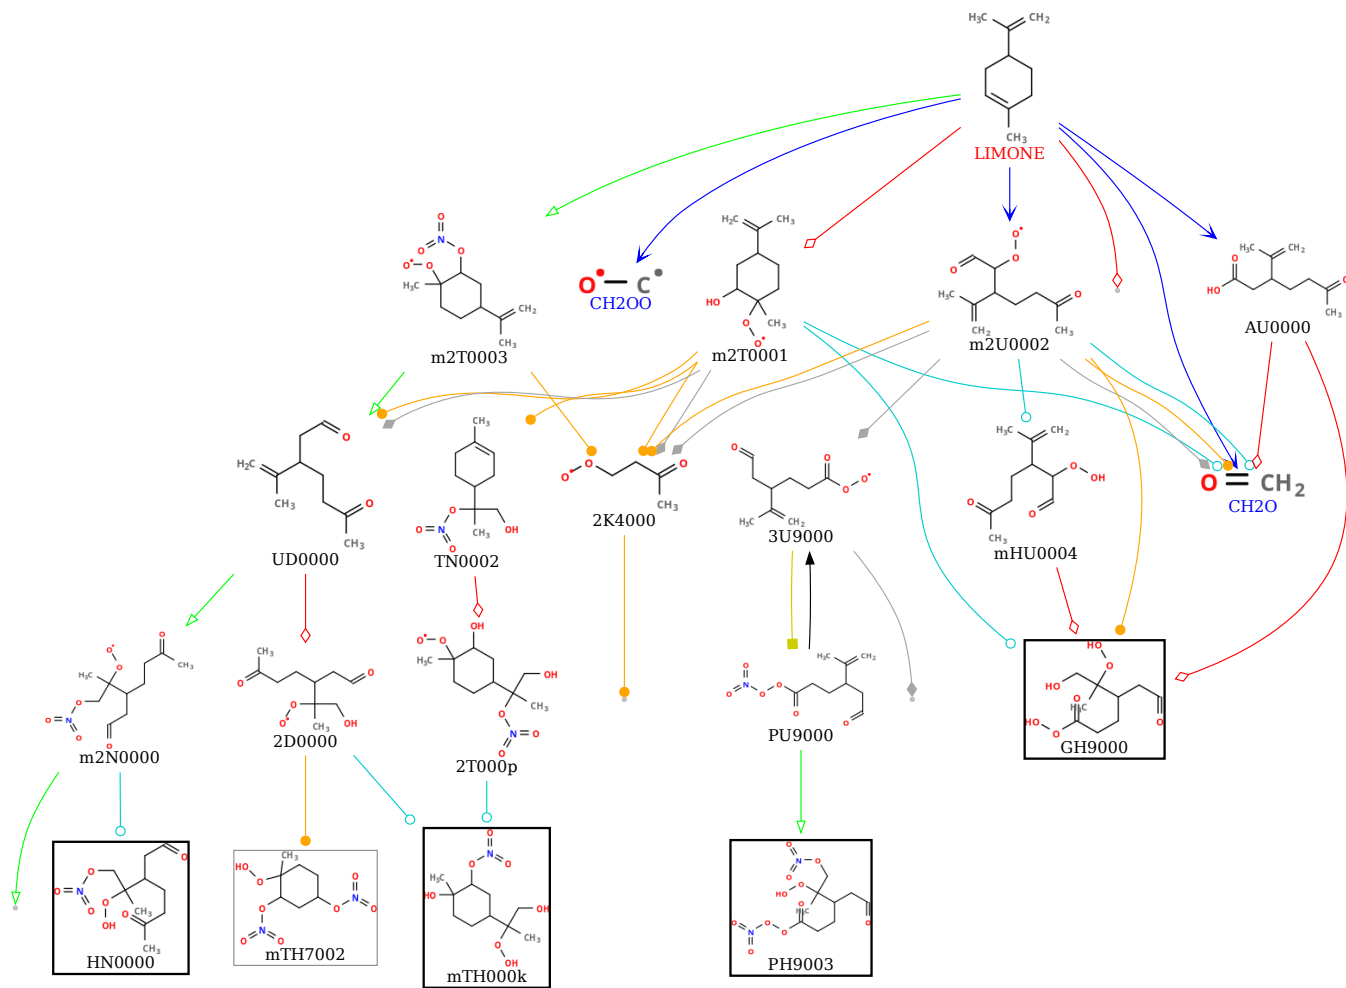

**Figure S30.** Reaction pathways of LIMSOA-M (LIMA3c) mechanism.

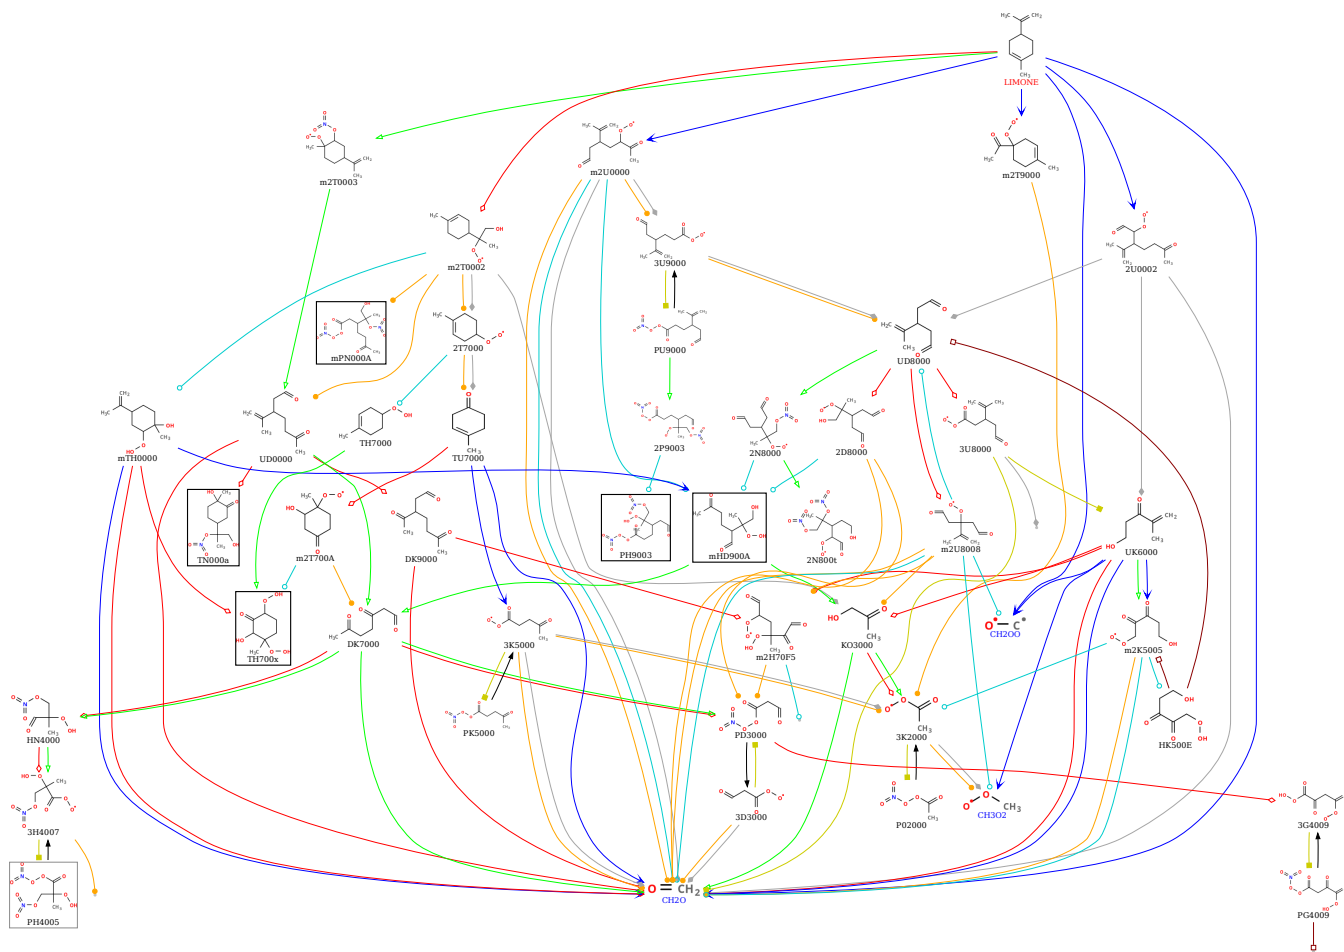

**Figure S31.** Reaction pathways of LIMMulti-H (LIMB2d) mechanism.

### S3.4 Reduction mechanism details

#### S3.4.1 Species mapping for surrogates from lumping

Table S6: Newly introduced surrogate species in U8SOA-H (U8A3d) and their associated reduced species, generated through lumping (“lp”) and, where applicable, replacement (“rp”). Molecular drawings are shown for all species. The dominant GECKO-A species defining each surrogate (“m” + species name) is listed in the first column, consistent with the reaction graph in Fig. 15(a), and is implicitly included in the lumped group but not duplicated in the associated species column.

| Surrogate | Sgy. | Merged species (U8SOA-H)                                                                       |                                                                                               |                                                                                               |                                                                                                |                                                                                                 |                                                                                                 |                                                                                               |
|-----------|------|------------------------------------------------------------------------------------------------|-----------------------------------------------------------------------------------------------|-----------------------------------------------------------------------------------------------|------------------------------------------------------------------------------------------------|-------------------------------------------------------------------------------------------------|-------------------------------------------------------------------------------------------------|-----------------------------------------------------------------------------------------------|
|           |      | 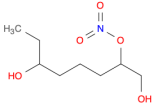<br>NO8006    | <br>NN800h   | <br>NK800A   | <br>NO800G   | <br>NN801Q   | <br>NK800z   |                                                                                               |
|           | rp   | <br>m2N800L   | <br>NN801P   | <br>NK800y   | <br>NO800F    | <br>NK800x    | <br>NN801O   | <br>NO800E |
|           |      | <br>2N801L    | <br>2N801K   | <br>2N8017   | <br>2N800P   |                                                                                                 |                                                                                                 |                                                                                               |
|           | lp   | <br>2N8013  | <br>2N8012 | <br>2N8011 | <br>2N801M | <br>2N800q |                                                                                                 |                                                                                               |
|           |      | <br>HN8022  | <br>HN8021 | <br>HN801Y | <br>HN801z | <br>HN802N | <br>HN800S |                                                                                               |
|           | lp   | <br>mHN800n | <br>HN800P | <br>HN801K | <br>HN800w  | <br>HN8007  |                                                                                                 |                                                                                               |

Surrogate

Sgy.

Merged species (U8SOA-H, continued)

rp

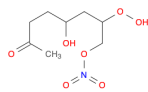

HN800U

rp

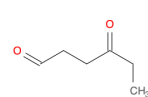

DK6003

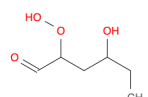

2D6005

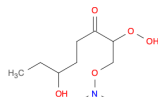

HN800R

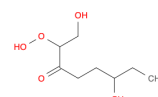

HK800J

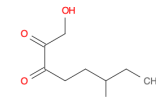

KK8003

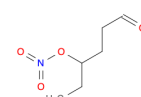

ND6006

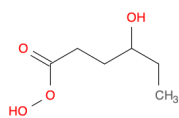

m3K6001

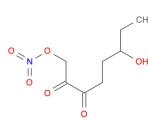

NK800J

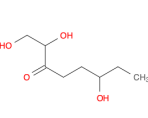

KO8005

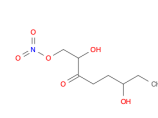

NK800I

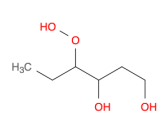

HO6002

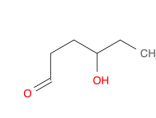

DO6000

lp

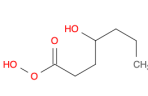

3K7000

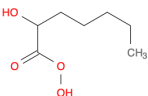

3K7002

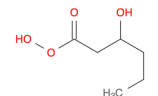

3K6002

lp

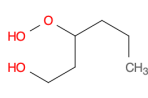

2O6004

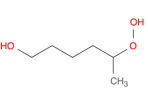

2O6003

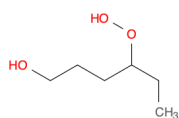

m2O6000

rp

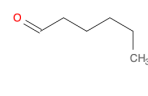

D06000

lp

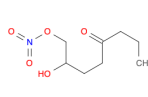

NK800I

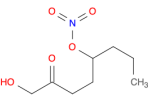

NK800K

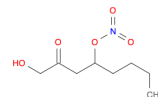

NK800s

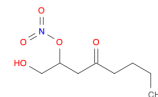

NK8008

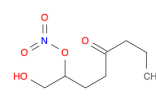

NK800B

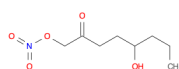

mNK8002

rp

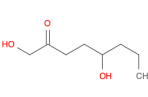

KO8002

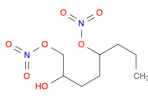

NN8001

| Surrogate                                                                                      | Sgy. | Merged species (U8SOA-H, continued)                                                           |                                                                                               |
|------------------------------------------------------------------------------------------------|------|-----------------------------------------------------------------------------------------------|-----------------------------------------------------------------------------------------------|
| 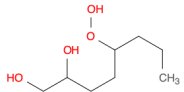<br>m2O8002   | lp   | <br>2O8005   | <br>2O8006   |
| <br>m2N8001   | rp   | <br>2N800J   | <br>2N800H   |
|                                                                                                | lp   | <br>2N800w   |                                                                                               |
| <br>mHO8002   | lp   | <br>HO8004   |                                                                                               |
|                                                                                                | rp   | <br>HO800G  |                                                                                               |
| <br>mNO8001 | lp   | <br>NO8000 |                                                                                               |
| <br>m2O8001 | lp   | <br>2O8000 | <br>2O7000 |

Table S7: New surrogate species and associated reduced species in U8SOA-M (U8A3c). The table follows the layout of Table S6. For clarity, only surrogate species and associated reduced species differing from Table S6 are shown. Surrogate species identical to those in Table S6 include m2N800L, mHN800n, m3K6001, m2O6000, mNK8002, m2O8002, m2N8001, mHO8002, mNO8001, and m2O8001. The corresponding reaction graph is presented in Fig. 15(b) of the main paper.

| Surrogate                                                                                    | Sgy. | Merged species (U8SOA-M)                                                                    |                                                                                             |                                                                                             |                                                                                              |                                                                                               |
|----------------------------------------------------------------------------------------------|------|---------------------------------------------------------------------------------------------|---------------------------------------------------------------------------------------------|---------------------------------------------------------------------------------------------|----------------------------------------------------------------------------------------------|-----------------------------------------------------------------------------------------------|
| 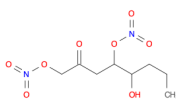<br>mNN8003 | lp   | <br>NN800q | <br>NN800w |                                                                                             |                                                                                              |                                                                                               |
|                                                                                              | rp   | <br>1H803c | <br>ND700F | <br>NK8007 | <br>NK800F | <br>NK800D |

Table S8: New surrogate species and associated reduced mechanisms in U8Multi-H (U8B2d). The table layout is shown in Table S6, with the corresponding reaction graph shown in Fig. 16 of the main paper.

| Surrogate                                                                                      | Sgy. | Merged species (U8Multi-H)                                                                    |                                                                                               |                                                                                               |                                                                                                |                                                                                                 |                                                                                                 |
|------------------------------------------------------------------------------------------------|------|-----------------------------------------------------------------------------------------------|-----------------------------------------------------------------------------------------------|-----------------------------------------------------------------------------------------------|------------------------------------------------------------------------------------------------|-------------------------------------------------------------------------------------------------|-------------------------------------------------------------------------------------------------|
| 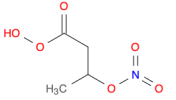<br>m3N4002 | rp   | <br>2O4003 | <br>3K4004 | <br>3K4000 | <br>DK5002 | <br>3K5002 | <br>2D4006 |
|                                                                                                | lp   | <br>3N3004 |                                                                                               |                                                                                               |                                                                                                |                                                                                                 |                                                                                                 |
| <br>m2O6000 | lp   | <br>2O6001 |                                                                                               |                                                                                               |                                                                                                |                                                                                                 |                                                                                                 |

Surrogate

Sgy.

Merged species (U8Multi-H, continued)

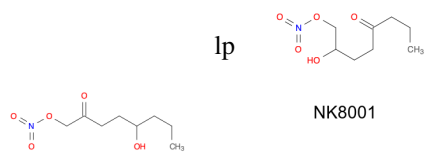

lp

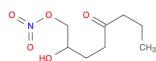

rp

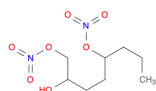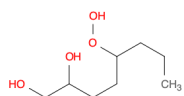

lp

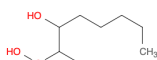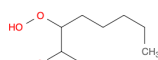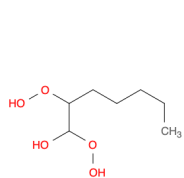

rp

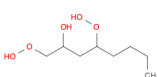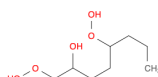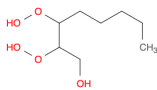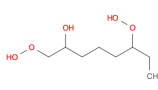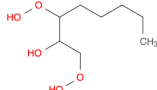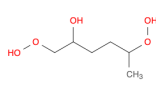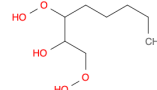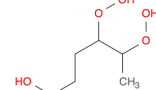

lp

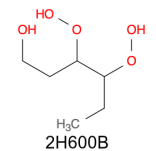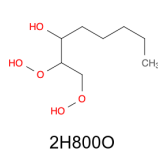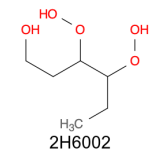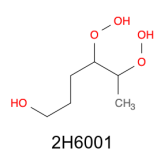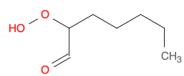

lp

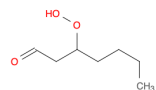

| Surrogate                                                                           | Sgy. | Merged species (U8Multi-H, continued)                                               |
|-------------------------------------------------------------------------------------|------|-------------------------------------------------------------------------------------|
| 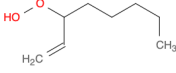   | lp   |    |
| m2U8000                                                                             |      | 2U8001                                                                              |
|    | lp   |    |
| mHU8000                                                                             |      | HU8001                                                                              |
|    | lp   |    |
| m2O8001                                                                             |      | 2O8000                                                                              |
|                                                                                     |      |    |
|                                                                                     |      | 2O7000                                                                              |
|    | lp   |    |
| mP07000                                                                             |      | P06000                                                                              |
|  | lp   |   |
| mNK800E                                                                             |      | NK800H                                                                              |
|                                                                                     |      |   |
|                                                                                     |      | NK8005                                                                              |
|                                                                                     |      |  |
|                                                                                     |      | NK800g                                                                              |
|                                                                                     | rp   |  |
|                                                                                     |      | ND6006                                                                              |
|                                                                                     |      |  |
|                                                                                     |      | NK800F                                                                              |

### S3.5 Carbon propagation and conservation

To diagnose how different reduction configurations affect carbon representation, a carbon propagation analysis was performed for reduced mechanisms derived from the U8, C12, and LIM reductions. The carbon loss fraction ( $C_{\text{loss}}$ ) measures the fraction of PVOC carbon not propagated into explicitly represented downstream products. This metric reflects the extent to which

downstream reaction pathways remain represented in a reduced mechanism and does not imply a lack of stoichiometric consistency within individual reactions. This diagnostic is intended to characterize configuration sensitivity rather than to serve as a performance metric.

As shown in Table S9, reference mechanisms (Ref) show negligible carbon loss across all PVOCs ( $C_{\text{loss}} < 0.03$ ), while the TBR mechanisms used as starting points for SBR (StP) show carbon loss in the range of 0.23–0.31, reflecting pruning induced in TBR. SOA-focused reductions exhibit substantially higher carbon loss at early SBR stages, with  $C_{\text{loss}}$  reaching 0.77–0.87 for U8 and LIM and 0.56–0.85 for C12 during Stage 1. This behavior is expected, as SOA-focused reduction prioritizes compact mechanisms by truncating downstream oxidation pathways that are weakly relevant for SOA formation. At Stage 3, carbon loss decreases for some configurations, with  $C_{\text{loss}}$  ranging from 0.48–0.61 for U8, 0.28–0.86 for C12, and 0.56–0.62 for LIM.

Multi-target reductions retain a larger fraction of carbon than SOA-focused reductions, with the final reduced mechanisms (B2a–B2d) exhibiting  $C_{\text{loss}} = 0.56$ –0.60 for U8, 0.60–0.73 for C12, and 0.35–0.54 for LIM. This reflects the additional constraints imposed by gas-phase evaluation targets, which limit pathway truncation and preserve greater propagation depth.

These results are consistent with the reduction philosophy described in the main text. The reduction workflow prioritizes removal-based strategies to produce compact mechanisms optimized for selected targets, rather than enforcing carbon conservation across all generations. Reduction therefore proceeds primarily through branch truncation, with downstream chemistry excluded once it no longer influences the specified targets. That said, elevated  $C_{\text{loss}}$  values quantify the resulting pathway truncation and do not indicate numerical or chemical inconsistency.

**Table S9.** Fraction of carbon not propagated into explicitly represented downstream species ( $C_{\text{loss}}$ ) for SOA-focused (A) and multi-target (B) reduction configurations across the U8, C12, and LIM reductions.

| SOA-focused (A) |       |       |       | Multi-target (B) |       |       |       |
|-----------------|-------|-------|-------|------------------|-------|-------|-------|
| Mech.           | U8    | C12   | LIM   | Mech.            | U8    | C12   | LIM   |
| Ref             | 0.003 | 0.030 | 0.001 | Ref              | 0.003 | 0.030 | 0.001 |
| StP             | 0.232 | 0.310 | 0.251 | StP              | 0.232 | 0.310 | 0.251 |
| A0.1            | 0.774 | 0.563 | 0.859 | B0.1             | 0.566 | 0.715 | 0.389 |
| A1              | 0.826 | 0.846 | 0.871 | B1               | 0.604 | 0.770 | 0.391 |
| A2a             | 0.819 | 0.792 | 0.736 | –                | –     | –     | –     |
| A2b             | 0.774 | 0.751 | 0.740 | –                | –     | –     | –     |
| A2c             | 0.776 | 0.752 | 0.692 | –                | –     | –     | –     |
| <b>A3a</b>      | 0.478 | 0.864 | 0.619 | <b>B2a</b>       | 0.591 | 0.734 | 0.349 |
| A3b             | 0.511 | 0.371 | 0.559 | B2b              | 0.600 | 0.671 | 0.346 |
| <b>A3c</b>      | 0.612 | 0.638 | 0.608 | <b>B2c</b>       | 0.556 | 0.604 | 0.412 |
| <b>A3d</b>      | 0.556 | 0.278 | 0.597 | <b>B2d</b>       | 0.591 | 0.680 | 0.535 |

## References

- Aumont, B., Camredon, M., Lee-Taylor, J., and Valorso, R.: GECKO-A: Generator for Explicit Chemistry and Kinetics of Organics in the Atmosphere, <https://doi.org/10.5281/zenodo.15309905>, 2025.
- Wolfe, G. and Haskins, D. J.: F0AM v4.3.0.1, <https://doi.org/10.5281/zenodo.10069985>, 2023.
